# Supplementary material for: Detection and characterization of microRNA expression profiling and its target genes in response to canine parvovirus in Crandell Reese Feline Kidney cells
Source: PeerJ. 2020 Feb 12;8:e8522. doi: 10.7717/peerj.8522 (PMC7023829; doi:10.7717/peerj.8522)
Supplement: Supplemental Information 11 — GO enrichment analysis of target genes of differentially expressed miRNA genes (miR-222, miR-322, miR-361, miR-365, miR-1247 and Novel-137) by g:Profiler and PANTHER GO Enrichment Analysis. [file peerj-08-8522-s011.xlsx]

## Sheet: gProfiler
gProfiler: fcatus-miR-222
source	term_name	term_id	adjusted_p_value	negative_log10_of_adjusted_p_value	term_size	query_size	intersection_size	effective_domain_size	intersections
GO:CC	cytoplasm	GO:0005737	0.0202766	1.69301	7686	314	198	14804	ENSFCAG00000024442,ENSFCAG00000006368,ENSFCAG00000040114,ENSFCAG00000008445,ENSFCAG00000003562,ENSFCAG00000033639,ENSFCAG00000013369,ENSFCAG00000010025,ENSFCAG00000022033,ENSFCAG00000005921,ENSFCAG00000031267,ENSFCAG00000031235,ENSFCAG00000012263,ENSFCAG00000004738,ENSFCAG00000029889,ENSFCAG00000008965,ENSFCAG00000041521,ENSFCAG00000026468,ENSFCAG00000009931,ENSFCAG00000003346,ENSFCAG00000029229,…
GO:CC	intracellular part	GO:0044424	0.0396481	1.40178	10496	314	251	14804	ENSFCAG00000003905,ENSFCAG00000024442,ENSFCAG00000006368,ENSFCAG00000040114,ENSFCAG00000008445,ENSFCAG00000003562,ENSFCAG00000033639,ENSFCAG00000013369,ENSFCAG00000010025,ENSFCAG00000030569,ENSFCAG00000022033,ENSFCAG00000005921,ENSFCAG00000031267,ENSFCAG00000031235,ENSFCAG00000014905,ENSFCAG00000012263,ENSFCAG00000004738,ENSFCAG00000029889,ENSFCAG00000008965,ENSFCAG00000041521,ENSFCAG00000026468,…
GO:CC	cytoplasmic part	GO:0044444	0.0396481	1.40178	6125	314	161	14804	ENSFCAG00000024442,ENSFCAG00000006368,ENSFCAG00000040114,ENSFCAG00000008445,ENSFCAG00000003562,ENSFCAG00000033639,ENSFCAG00000013369,ENSFCAG00000010025,ENSFCAG00000022033,ENSFCAG00000031267,ENSFCAG00000012263,ENSFCAG00000029889,ENSFCAG00000041521,ENSFCAG00000026468,ENSFCAG00000003346,ENSFCAG00000000737,ENSFCAG00000007712,ENSFCAG00000041096,ENSFCAG00000003884,ENSFCAG00000029132,ENSFCAG00000036785,…
gProfiler: fcatus-miR-322
source	term_name	term_id	adjusted_p_value	negative_log10_of_adjusted_p_value	term_size	query_size	intersection_size	effective_domain_size	intersections
GO:MF	protein binding	GO:0005515	1.52026e-06	5.81808	5273	738	371	13297	ENSFCAG00000002372,ENSFCAG00000042641,ENSFCAG00000012982,ENSFCAG00000005618,ENSFCAG00000001913,ENSFCAG00000032144,ENSFCAG00000023845,ENSFCAG00000000939,ENSFCAG00000028685,ENSFCAG00000001632,ENSFCAG00000001749,ENSFCAG00000045902,ENSFCAG00000006839,ENSFCAG00000012005,ENSFCAG00000009244,ENSFCAG00000008668,ENSFCAG00000011721,ENSFCAG00000022205,ENSFCAG00000012828,ENSFCAG00000011280,ENSFCAG00000004245,…
GO:MF	enzyme binding	GO:0019899	1.2241e-05	4.91218	1637	738	142	13297	ENSFCAG00000012982,ENSFCAG00000032144,ENSFCAG00000000939,ENSFCAG00000028685,ENSFCAG00000012005,ENSFCAG00000008668,ENSFCAG00000022205,ENSFCAG00000004245,ENSFCAG00000028065,ENSFCAG00000004429,ENSFCAG00000001556,ENSFCAG00000012553,ENSFCAG00000002868,ENSFCAG00000014533,ENSFCAG00000011941,ENSFCAG00000026735,ENSFCAG00000013637,ENSFCAG00000029645,ENSFCAG00000000178,ENSFCAG00000043362,ENSFCAG00000004503,…
GO:MF	phosphotransferase activity, alcohol group as acceptor	GO:0016773	0.000260338	3.58446	638	738	66	13297	ENSFCAG00000023845,ENSFCAG00000003700,ENSFCAG00000002604,ENSFCAG00000029927,ENSFCAG00000011147,ENSFCAG00000004828,ENSFCAG00000009897,ENSFCAG00000027060,ENSFCAG00000006721,ENSFCAG00000015103,ENSFCAG00000000924,ENSFCAG00000027515,ENSFCAG00000004159,ENSFCAG00000002072,ENSFCAG00000012659,ENSFCAG00000006717,ENSFCAG00000011099,ENSFCAG00000013612,ENSFCAG00000016224,ENSFCAG00000030121,ENSFCAG00000004539,…
GO:MF	transferase activity, transferring phosphorus-containing groups	GO:0016772	0.000787554	3.10372	829	738	78	13297	ENSFCAG00000023845,ENSFCAG00000003700,ENSFCAG00000002604,ENSFCAG00000029927,ENSFCAG00000011147,ENSFCAG00000001624,ENSFCAG00000004828,ENSFCAG00000009897,ENSFCAG00000027060,ENSFCAG00000006721,ENSFCAG00000031257,ENSFCAG00000015103,ENSFCAG00000000924,ENSFCAG00000027515,ENSFCAG00000004159,ENSFCAG00000002072,ENSFCAG00000012659,ENSFCAG00000001163,ENSFCAG00000006717,ENSFCAG00000011099,ENSFCAG00000013612,…
GO:MF	kinase activity	GO:0016301	0.000808282	3.09244	696	738	68	13297	ENSFCAG00000023845,ENSFCAG00000003700,ENSFCAG00000002604,ENSFCAG00000029927,ENSFCAG00000011147,ENSFCAG00000001624,ENSFCAG00000004828,ENSFCAG00000009897,ENSFCAG00000027060,ENSFCAG00000006721,ENSFCAG00000015103,ENSFCAG00000000924,ENSFCAG00000027515,ENSFCAG00000004159,ENSFCAG00000002072,ENSFCAG00000012659,ENSFCAG00000006717,ENSFCAG00000011099,ENSFCAG00000013612,ENSFCAG00000016224,ENSFCAG00000030121,…
GO:MF	binding	GO:0005488	0.00125681	2.90073	9644	738	586	13297	ENSFCAG00000002372,ENSFCAG00000042641,ENSFCAG00000009259,ENSFCAG00000007784,ENSFCAG00000012982,ENSFCAG00000005618,ENSFCAG00000001913,ENSFCAG00000002309,ENSFCAG00000032144,ENSFCAG00000023845,ENSFCAG00000000939,ENSFCAG00000025759,ENSFCAG00000022677,ENSFCAG00000028685,ENSFCAG00000022120,ENSFCAG00000013803,ENSFCAG00000001632,ENSFCAG00000001749,ENSFCAG00000045902,ENSFCAG00000006839,ENSFCAG00000012005,…
GO:MF	catalytic activity, acting on a protein	GO:0140096	0.00127483	2.89455	1825	738	143	13297	ENSFCAG00000023845,ENSFCAG00000010408,ENSFCAG00000013803,ENSFCAG00000001749,ENSFCAG00000003700,ENSFCAG00000008668,ENSFCAG00000022205,ENSFCAG00000006368,ENSFCAG00000000178,ENSFCAG00000002604,ENSFCAG00000029927,ENSFCAG00000004893,ENSFCAG00000011147,ENSFCAG00000004828,ENSFCAG00000019152,ENSFCAG00000009897,ENSFCAG00000027060,ENSFCAG00000006721,ENSFCAG00000015103,ENSFCAG00000000924,ENSFCAG00000008274,…
GO:MF	protein kinase activity	GO:0004672	0.00129788	2.88676	541	738	55	13297	ENSFCAG00000023845,ENSFCAG00000003700,ENSFCAG00000002604,ENSFCAG00000029927,ENSFCAG00000011147,ENSFCAG00000004828,ENSFCAG00000009897,ENSFCAG00000027060,ENSFCAG00000006721,ENSFCAG00000015103,ENSFCAG00000000924,ENSFCAG00000027515,ENSFCAG00000004159,ENSFCAG00000006717,ENSFCAG00000011099,ENSFCAG00000013612,ENSFCAG00000016224,ENSFCAG00000004539,ENSFCAG00000013696,ENSFCAG00000003030,ENSFCAG00000028588,…
GO:MF	transferase activity	GO:0016740	0.00129788	2.88676	1864	738	145	13297	ENSFCAG00000023845,ENSFCAG00000003700,ENSFCAG00000008668,ENSFCAG00000022205,ENSFCAG00000006368,ENSFCAG00000002604,ENSFCAG00000011884,ENSFCAG00000029927,ENSFCAG00000004893,ENSFCAG00000028436,ENSFCAG00000011147,ENSFCAG00000001624,ENSFCAG00000004828,ENSFCAG00000009897,ENSFCAG00000027060,ENSFCAG00000006721,ENSFCAG00000031257,ENSFCAG00000007543,ENSFCAG00000015103,ENSFCAG00000023928,ENSFCAG00000000924,…
GO:MF	SMAD binding	GO:0046332	0.0036619	2.43629	71	738	14	13297	ENSFCAG00000023845,ENSFCAG00000018794,ENSFCAG00000015036,ENSFCAG00000030327,ENSFCAG00000022980,ENSFCAG00000022495,ENSFCAG00000012502,ENSFCAG00000009412,ENSFCAG00000026707,ENSFCAG00000027081,ENSFCAG00000005257,ENSFCAG00000015062,ENSFCAG00000012148,ENSFCAG00000040498
GO:MF	translation initiation factor binding	GO:0031369	0.0248044	1.60547	24	738	7	13297	ENSFCAG00000011721,ENSFCAG00000002535,ENSFCAG00000025339,ENSFCAG00000007787,ENSFCAG00000007794,ENSFCAG00000027816,ENSFCAG00000037688
GO:MF	Ran GTPase binding	GO:0008536	0.0248044	1.60547	24	738	7	13297	ENSFCAG00000030327,ENSFCAG00000007002,ENSFCAG00000000444,ENSFCAG00000023994,ENSFCAG00000012502,ENSFCAG00000010309,ENSFCAG00000008965
GO:MF	transcription factor binding	GO:0008134	0.0409217	1.38805	496	738	46	13297	ENSFCAG00000001749,ENSFCAG00000024950,ENSFCAG00000011941,ENSFCAG00000042690,ENSFCAG00000009897,ENSFCAG00000009367,ENSFCAG00000003572,ENSFCAG00000000566,ENSFCAG00000031864,ENSFCAG00000025339,ENSFCAG00000012659,ENSFCAG00000004661,ENSFCAG00000040439,ENSFCAG00000000145,ENSFCAG00000012368,ENSFCAG00000015036,ENSFCAG00000027147,ENSFCAG00000002156,ENSFCAG00000011470,ENSFCAG00000002605,ENSFCAG00000013801,…
GO:BP	localization	GO:0051179	7.50409e-05	4.1247	4500	812	328	14276	ENSFCAG00000009259,ENSFCAG00000007784,ENSFCAG00000012982,ENSFCAG00000001913,ENSFCAG00000000939,ENSFCAG00000015536,ENSFCAG00000001749,ENSFCAG00000003700,ENSFCAG00000031392,ENSFCAG00000012828,ENSFCAG00000011280,ENSFCAG00000004245,ENSFCAG00000028065,ENSFCAG00000033067,ENSFCAG00000004429,ENSFCAG00000043283,ENSFCAG00000001556,ENSFCAG00000023791,ENSFCAG00000037651,ENSFCAG00000027689,ENSFCAG00000004831,…
GO:BP	cellular component organization	GO:0016043	7.50409e-05	4.1247	4461	812	326	14276	ENSFCAG00000009259,ENSFCAG00000012982,ENSFCAG00000032144,ENSFCAG00000015677,ENSFCAG00000022677,ENSFCAG00000015289,ENSFCAG00000001749,ENSFCAG00000006543,ENSFCAG00000003700,ENSFCAG00000009244,ENSFCAG00000008668,ENSFCAG00000031392,ENSFCAG00000012828,ENSFCAG00000001556,ENSFCAG00000027689,ENSFCAG00000004831,ENSFCAG00000002122,ENSFCAG00000012553,ENSFCAG00000002868,ENSFCAG00000014533,ENSFCAG00000011941,…
GO:BP	cellular component organization or biogenesis	GO:0071840	0.000113853	3.94365	4599	812	332	14276	ENSFCAG00000002372,ENSFCAG00000042641,ENSFCAG00000009259,ENSFCAG00000012982,ENSFCAG00000032144,ENSFCAG00000015677,ENSFCAG00000022677,ENSFCAG00000015289,ENSFCAG00000001749,ENSFCAG00000006543,ENSFCAG00000003700,ENSFCAG00000009244,ENSFCAG00000008668,ENSFCAG00000031392,ENSFCAG00000012828,ENSFCAG00000001556,ENSFCAG00000027689,ENSFCAG00000004831,ENSFCAG00000002122,ENSFCAG00000012553,ENSFCAG00000002868,…
GO:BP	cellular localization	GO:0051641	0.000214846	3.66787	1864	812	157	14276	ENSFCAG00000000939,ENSFCAG00000001749,ENSFCAG00000031392,ENSFCAG00000004245,ENSFCAG00000028065,ENSFCAG00000033067,ENSFCAG00000004429,ENSFCAG00000043283,ENSFCAG00000001556,ENSFCAG00000023791,ENSFCAG00000011941,ENSFCAG00000013637,ENSFCAG00000029645,ENSFCAG00000031909,ENSFCAG00000004503,ENSFCAG00000015453,ENSFCAG00000005059,ENSFCAG00000004893,ENSFCAG00000001588,ENSFCAG00000001624,ENSFCAG00000027698,…
GO:BP	anatomical structure development	GO:0048856	0.000353105	3.4521	3817	812	280	14276	ENSFCAG00000042641,ENSFCAG00000012982,ENSFCAG00000032144,ENSFCAG00000023845,ENSFCAG00000010408,ENSFCAG00000015536,ENSFCAG00000015677,ENSFCAG00000025759,ENSFCAG00000022677,ENSFCAG00000022120,ENSFCAG00000045902,ENSFCAG00000006543,ENSFCAG00000003700,ENSFCAG00000033553,ENSFCAG00000012828,ENSFCAG00000011280,ENSFCAG00000004245,ENSFCAG00000043283,ENSFCAG00000001556,ENSFCAG00000027689,ENSFCAG00000004831,…
GO:BP	developmental process	GO:0032502	0.000353105	3.4521	4047	812	294	14276	ENSFCAG00000042641,ENSFCAG00000012982,ENSFCAG00000032144,ENSFCAG00000023845,ENSFCAG00000010408,ENSFCAG00000015536,ENSFCAG00000015677,ENSFCAG00000025759,ENSFCAG00000022677,ENSFCAG00000022120,ENSFCAG00000045902,ENSFCAG00000006543,ENSFCAG00000003700,ENSFCAG00000033553,ENSFCAG00000012828,ENSFCAG00000011280,ENSFCAG00000004245,ENSFCAG00000028065,ENSFCAG00000043283,ENSFCAG00000001556,ENSFCAG00000027689,…
GO:BP	negative regulation of cellular process	GO:0048523	0.000684178	3.16483	3350	812	249	14276	ENSFCAG00000042641,ENSFCAG00000010408,ENSFCAG00000015536,ENSFCAG00000022677,ENSFCAG00000028685,ENSFCAG00000045902,ENSFCAG00000003700,ENSFCAG00000009244,ENSFCAG00000033553,ENSFCAG00000004429,ENSFCAG00000001556,ENSFCAG00000006368,ENSFCAG00000027689,ENSFCAG00000004831,ENSFCAG00000002122,ENSFCAG00000024950,ENSFCAG00000011941,ENSFCAG00000026735,ENSFCAG00000029636,ENSFCAG00000029645,ENSFCAG00000031909,…
GO:BP	protein modification process	GO:0036211	0.000747935	3.12614	2901	812	220	14276	ENSFCAG00000012982,ENSFCAG00000023845,ENSFCAG00000022120,ENSFCAG00000013803,ENSFCAG00000001749,ENSFCAG00000003700,ENSFCAG00000008668,ENSFCAG00000022205,ENSFCAG00000001556,ENSFCAG00000006368,ENSFCAG00000011941,ENSFCAG00000026735,ENSFCAG00000029636,ENSFCAG00000013637,ENSFCAG00000029645,ENSFCAG00000031909,ENSFCAG00000043362,ENSFCAG00000004503,ENSFCAG00000002604,ENSFCAG00000001748,ENSFCAG00000029927,…
GO:BP	cellular protein modification process	GO:0006464	0.000747935	3.12614	2901	812	220	14276	ENSFCAG00000012982,ENSFCAG00000023845,ENSFCAG00000022120,ENSFCAG00000013803,ENSFCAG00000001749,ENSFCAG00000003700,ENSFCAG00000008668,ENSFCAG00000022205,ENSFCAG00000001556,ENSFCAG00000006368,ENSFCAG00000011941,ENSFCAG00000026735,ENSFCAG00000029636,ENSFCAG00000013637,ENSFCAG00000029645,ENSFCAG00000031909,ENSFCAG00000043362,ENSFCAG00000004503,ENSFCAG00000002604,ENSFCAG00000001748,ENSFCAG00000029927,…
GO:BP	system development	GO:0048731	0.000881963	3.05455	3182	812	237	14276	ENSFCAG00000012982,ENSFCAG00000023845,ENSFCAG00000010408,ENSFCAG00000015536,ENSFCAG00000015677,ENSFCAG00000025759,ENSFCAG00000022677,ENSFCAG00000022120,ENSFCAG00000045902,ENSFCAG00000003700,ENSFCAG00000033553,ENSFCAG00000012828,ENSFCAG00000011280,ENSFCAG00000004245,ENSFCAG00000001556,ENSFCAG00000004831,ENSFCAG00000012553,ENSFCAG00000014533,ENSFCAG00000029636,ENSFCAG00000031909,ENSFCAG00000004503,…
GO:BP	cell-cell signaling	GO:0007267	0.000982538	3.00765	909	812	86	14276	ENSFCAG00000000939,ENSFCAG00000028685,ENSFCAG00000043283,ENSFCAG00000001556,ENSFCAG00000014533,ENSFCAG00000011941,ENSFCAG00000000178,ENSFCAG00000011461,ENSFCAG00000015492,ENSFCAG00000000080,ENSFCAG00000001588,ENSFCAG00000001624,ENSFCAG00000010133,ENSFCAG00000014103,ENSFCAG00000001932,ENSFCAG00000001930,ENSFCAG00000001933,ENSFCAG00000002429,ENSFCAG00000011417,ENSFCAG00000033190,ENSFCAG00000025339,…
GO:BP	cellular developmental process	GO:0048869	0.00263904	2.57855	2819	812	211	14276	ENSFCAG00000012982,ENSFCAG00000032144,ENSFCAG00000023845,ENSFCAG00000015536,ENSFCAG00000022677,ENSFCAG00000022120,ENSFCAG00000045902,ENSFCAG00000006543,ENSFCAG00000003700,ENSFCAG00000033553,ENSFCAG00000028065,ENSFCAG00000001556,ENSFCAG00000004831,ENSFCAG00000012553,ENSFCAG00000014533,ENSFCAG00000029636,ENSFCAG00000031909,ENSFCAG00000011461,ENSFCAG00000042690,ENSFCAG00000015453,ENSFCAG00000005059,…
GO:BP	anatomical structure morphogenesis	GO:0009653	0.00287793	2.54092	1922	812	153	14276	ENSFCAG00000032144,ENSFCAG00000023845,ENSFCAG00000015536,ENSFCAG00000015677,ENSFCAG00000045902,ENSFCAG00000006543,ENSFCAG00000003700,ENSFCAG00000033553,ENSFCAG00000011280,ENSFCAG00000001556,ENSFCAG00000027689,ENSFCAG00000004831,ENSFCAG00000011461,ENSFCAG00000005059,ENSFCAG00000011581,ENSFCAG00000004893,ENSFCAG00000034944,ENSFCAG00000026699,ENSFCAG00000011301,ENSFCAG00000013129,ENSFCAG00000042990,…
GO:BP	multicellular organism development	GO:0007275	0.00296163	2.52847	3411	812	247	14276	ENSFCAG00000042641,ENSFCAG00000012982,ENSFCAG00000023845,ENSFCAG00000010408,ENSFCAG00000015536,ENSFCAG00000015677,ENSFCAG00000025759,ENSFCAG00000022677,ENSFCAG00000022120,ENSFCAG00000045902,ENSFCAG00000003700,ENSFCAG00000033553,ENSFCAG00000012828,ENSFCAG00000011280,ENSFCAG00000004245,ENSFCAG00000043283,ENSFCAG00000001556,ENSFCAG00000004831,ENSFCAG00000012553,ENSFCAG00000014533,ENSFCAG00000029636,…
GO:BP	cell surface receptor signaling pathway involved in cell-cell signaling	GO:1905114	0.00296163	2.52847	371	812	43	14276	ENSFCAG00000028685,ENSFCAG00000001556,ENSFCAG00000001588,ENSFCAG00000001624,ENSFCAG00000014103,ENSFCAG00000001932,ENSFCAG00000001930,ENSFCAG00000001933,ENSFCAG00000033190,ENSFCAG00000025339,ENSFCAG00000000063,ENSFCAG00000019220,ENSFCAG00000033140,ENSFCAG00000005027,ENSFCAG00000045255,ENSFCAG00000023738,ENSFCAG00000033108,ENSFCAG00000011470,ENSFCAG00000004558,ENSFCAG00000023857,ENSFCAG00000008064,…
GO:BP	cell surface receptor signaling pathway	GO:0007166	0.00303494	2.51785	1870	812	149	14276	ENSFCAG00000001913,ENSFCAG00000023845,ENSFCAG00000000939,ENSFCAG00000015536,ENSFCAG00000015677,ENSFCAG00000014334,ENSFCAG00000025759,ENSFCAG00000028685,ENSFCAG00000012828,ENSFCAG00000001556,ENSFCAG00000011941,ENSFCAG00000026735,ENSFCAG00000029636,ENSFCAG00000004503,ENSFCAG00000010776,ENSFCAG00000000080,ENSFCAG00000038541,ENSFCAG00000001588,ENSFCAG00000001624,ENSFCAG00000034944,ENSFCAG00000033191,…
GO:BP	negative regulation of biological process	GO:0048519	0.00323876	2.48962	3714	812	265	14276	ENSFCAG00000042641,ENSFCAG00000010408,ENSFCAG00000015536,ENSFCAG00000015677,ENSFCAG00000022677,ENSFCAG00000028685,ENSFCAG00000045902,ENSFCAG00000003700,ENSFCAG00000009244,ENSFCAG00000033553,ENSFCAG00000004429,ENSFCAG00000001556,ENSFCAG00000006368,ENSFCAG00000027689,ENSFCAG00000004831,ENSFCAG00000002122,ENSFCAG00000024950,ENSFCAG00000011941,ENSFCAG00000026735,ENSFCAG00000029636,ENSFCAG00000029645,…
GO:BP	regulation of cellular response to growth factor stimulus	GO:0090287	0.00324645	2.48859	201	812	28	14276	ENSFCAG00000023845,ENSFCAG00000015536,ENSFCAG00000011147,ENSFCAG00000018794,ENSFCAG00000004661,ENSFCAG00000006717,ENSFCAG00000040439,ENSFCAG00000019220,ENSFCAG00000013612,ENSFCAG00000007838,ENSFCAG00000033140,ENSFCAG00000037811,ENSFCAG00000002726,ENSFCAG00000004558,ENSFCAG00000022980,ENSFCAG00000005274,ENSFCAG00000007960,ENSFCAG00000011124,ENSFCAG00000025034,ENSFCAG00000009412,ENSFCAG00000026811,…
GO:BP	nervous system development	GO:0007399	0.00324645	2.48859	1502	812	124	14276	ENSFCAG00000012982,ENSFCAG00000015536,ENSFCAG00000015677,ENSFCAG00000025759,ENSFCAG00000022677,ENSFCAG00000022120,ENSFCAG00000003700,ENSFCAG00000033553,ENSFCAG00000001556,ENSFCAG00000004831,ENSFCAG00000012553,ENSFCAG00000004503,ENSFCAG00000011461,ENSFCAG00000015453,ENSFCAG00000034944,ENSFCAG00000045383,ENSFCAG00000001932,ENSFCAG00000002429,ENSFCAG00000030194,ENSFCAG00000013129,ENSFCAG00000039189,…
GO:BP	skeletal muscle fiber differentiation	GO:0098528	0.00324645	2.48859	4	812	4	14276	ENSFCAG00000026867,ENSFCAG00000024818,ENSFCAG00000046251,ENSFCAG00000026109
GO:BP	protein localization	GO:0008104	0.0037333	2.42791	1765	812	141	14276	ENSFCAG00000000939,ENSFCAG00000001749,ENSFCAG00000031392,ENSFCAG00000004245,ENSFCAG00000028065,ENSFCAG00000033067,ENSFCAG00000004429,ENSFCAG00000043283,ENSFCAG00000011941,ENSFCAG00000026735,ENSFCAG00000013637,ENSFCAG00000031909,ENSFCAG00000004503,ENSFCAG00000030303,ENSFCAG00000004893,ENSFCAG00000001624,ENSFCAG00000027698,ENSFCAG00000045383,ENSFCAG00000009367,ENSFCAG00000012937,ENSFCAG00000025745,…
GO:BP	macromolecule localization	GO:0033036	0.0037333	2.42791	2011	812	157	14276	ENSFCAG00000009259,ENSFCAG00000000939,ENSFCAG00000001749,ENSFCAG00000031392,ENSFCAG00000012828,ENSFCAG00000004245,ENSFCAG00000028065,ENSFCAG00000033067,ENSFCAG00000004429,ENSFCAG00000043283,ENSFCAG00000011941,ENSFCAG00000026735,ENSFCAG00000013637,ENSFCAG00000031909,ENSFCAG00000004503,ENSFCAG00000030303,ENSFCAG00000004893,ENSFCAG00000001624,ENSFCAG00000027698,ENSFCAG00000045383,ENSFCAG00000009367,…
GO:BP	negative regulation of signaling	GO:0023057	0.0040394	2.39368	946	812	85	14276	ENSFCAG00000015536,ENSFCAG00000027689,ENSFCAG00000004831,ENSFCAG00000011941,ENSFCAG00000026735,ENSFCAG00000029636,ENSFCAG00000027698,ENSFCAG00000009367,ENSFCAG00000033191,ENSFCAG00000021968,ENSFCAG00000018794,ENSFCAG00000012450,ENSFCAG00000033190,ENSFCAG00000026867,ENSFCAG00000025339,ENSFCAG00000014721,ENSFCAG00000000063,ENSFCAG00000000764,ENSFCAG00000037697,ENSFCAG00000046381,ENSFCAG00000011099,…
GO:BP	positive regulation of biological process	GO:0048518	0.00417714	2.37912	4388	812	304	14276	ENSFCAG00000042641,ENSFCAG00000012982,ENSFCAG00000023845,ENSFCAG00000015536,ENSFCAG00000015677,ENSFCAG00000022677,ENSFCAG00000028685,ENSFCAG00000022120,ENSFCAG00000003700,ENSFCAG00000033553,ENSFCAG00000022205,ENSFCAG00000012828,ENSFCAG00000011280,ENSFCAG00000028065,ENSFCAG00000001556,ENSFCAG00000006368,ENSFCAG00000004831,ENSFCAG00000012553,ENSFCAG00000014533,ENSFCAG00000011941,ENSFCAG00000029636,…
GO:BP	macromolecule modification	GO:0043412	0.00417714	2.37912	3045	812	222	14276	ENSFCAG00000012982,ENSFCAG00000023845,ENSFCAG00000022120,ENSFCAG00000013803,ENSFCAG00000001749,ENSFCAG00000003700,ENSFCAG00000008668,ENSFCAG00000022205,ENSFCAG00000001556,ENSFCAG00000006368,ENSFCAG00000011941,ENSFCAG00000026735,ENSFCAG00000029636,ENSFCAG00000013637,ENSFCAG00000029645,ENSFCAG00000031909,ENSFCAG00000043362,ENSFCAG00000004503,ENSFCAG00000002604,ENSFCAG00000001748,ENSFCAG00000029927,…
GO:BP	cellular protein localization	GO:0034613	0.00455498	2.34151	1270	812	107	14276	ENSFCAG00000001749,ENSFCAG00000031392,ENSFCAG00000004245,ENSFCAG00000028065,ENSFCAG00000033067,ENSFCAG00000004429,ENSFCAG00000043283,ENSFCAG00000013637,ENSFCAG00000004503,ENSFCAG00000004893,ENSFCAG00000001624,ENSFCAG00000027698,ENSFCAG00000045383,ENSFCAG00000009367,ENSFCAG00000012937,ENSFCAG00000031450,ENSFCAG00000013129,ENSFCAG00000004159,ENSFCAG00000003903,ENSFCAG00000031864,ENSFCAG00000025339,…
GO:BP	positive regulation of cellular process	GO:0048522	0.00523009	2.28149	3846	812	270	14276	ENSFCAG00000042641,ENSFCAG00000012982,ENSFCAG00000023845,ENSFCAG00000015536,ENSFCAG00000015677,ENSFCAG00000022677,ENSFCAG00000028685,ENSFCAG00000022120,ENSFCAG00000003700,ENSFCAG00000033553,ENSFCAG00000022205,ENSFCAG00000012828,ENSFCAG00000011280,ENSFCAG00000028065,ENSFCAG00000001556,ENSFCAG00000004831,ENSFCAG00000012553,ENSFCAG00000014533,ENSFCAG00000011941,ENSFCAG00000029636,ENSFCAG00000013637,…
GO:BP	negative regulation of response to stimulus	GO:0048585	0.00523009	2.28149	1145	812	98	14276	ENSFCAG00000010408,ENSFCAG00000015536,ENSFCAG00000028685,ENSFCAG00000045902,ENSFCAG00000003700,ENSFCAG00000027689,ENSFCAG00000004831,ENSFCAG00000011941,ENSFCAG00000026735,ENSFCAG00000029636,ENSFCAG00000011147,ENSFCAG00000027698,ENSFCAG00000034944,ENSFCAG00000009367,ENSFCAG00000033191,ENSFCAG00000021968,ENSFCAG00000018794,ENSFCAG00000012450,ENSFCAG00000033190,ENSFCAG00000026867,ENSFCAG00000025339,…
GO:BP	negative regulation of cell communication	GO:0010648	0.00523009	2.28149	943	812	84	14276	ENSFCAG00000015536,ENSFCAG00000027689,ENSFCAG00000004831,ENSFCAG00000011941,ENSFCAG00000026735,ENSFCAG00000029636,ENSFCAG00000027698,ENSFCAG00000009367,ENSFCAG00000033191,ENSFCAG00000021968,ENSFCAG00000018794,ENSFCAG00000012450,ENSFCAG00000033190,ENSFCAG00000026867,ENSFCAG00000025339,ENSFCAG00000014721,ENSFCAG00000000063,ENSFCAG00000000764,ENSFCAG00000037697,ENSFCAG00000046381,ENSFCAG00000011099,…
GO:BP	cellular macromolecule localization	GO:0070727	0.00523009	2.28149	1278	812	107	14276	ENSFCAG00000001749,ENSFCAG00000031392,ENSFCAG00000004245,ENSFCAG00000028065,ENSFCAG00000033067,ENSFCAG00000004429,ENSFCAG00000043283,ENSFCAG00000013637,ENSFCAG00000004503,ENSFCAG00000004893,ENSFCAG00000001624,ENSFCAG00000027698,ENSFCAG00000045383,ENSFCAG00000009367,ENSFCAG00000012937,ENSFCAG00000031450,ENSFCAG00000013129,ENSFCAG00000004159,ENSFCAG00000003903,ENSFCAG00000031864,ENSFCAG00000025339,…
GO:BP	somite development	GO:0061053	0.0056439	2.24842	78	812	15	14276	ENSFCAG00000033553,ENSFCAG00000026699,ENSFCAG00000004661,ENSFCAG00000022135,ENSFCAG00000028542,ENSFCAG00000000253,ENSFCAG00000000965,ENSFCAG00000007884,ENSFCAG00000025483,ENSFCAG00000011205,ENSFCAG00000033649,ENSFCAG00000026109,ENSFCAG00000027081,ENSFCAG00000005257,ENSFCAG00000040613
GO:BP	cell differentiation	GO:0030154	0.00690517	2.16083	2663	812	196	14276	ENSFCAG00000012982,ENSFCAG00000032144,ENSFCAG00000023845,ENSFCAG00000015536,ENSFCAG00000022677,ENSFCAG00000022120,ENSFCAG00000045902,ENSFCAG00000006543,ENSFCAG00000033553,ENSFCAG00000028065,ENSFCAG00000001556,ENSFCAG00000004831,ENSFCAG00000012553,ENSFCAG00000014533,ENSFCAG00000029636,ENSFCAG00000031909,ENSFCAG00000011461,ENSFCAG00000042690,ENSFCAG00000015453,ENSFCAG00000005059,ENSFCAG00000004893,…
GO:BP	ubiquitin-dependent protein catabolic process	GO:0006511	0.00690517	2.16083	461	812	48	14276	ENSFCAG00000008668,ENSFCAG00000022205,ENSFCAG00000006368,ENSFCAG00000001954,ENSFCAG00000011941,ENSFCAG00000026735,ENSFCAG00000004503,ENSFCAG00000044111,ENSFCAG00000014246,ENSFCAG00000031864,ENSFCAG00000004069,ENSFCAG00000026076,ENSFCAG00000007266,ENSFCAG00000014617,ENSFCAG00000032581,ENSFCAG00000002568,ENSFCAG00000022049,ENSFCAG00000023857,ENSFCAG00000007897,ENSFCAG00000002182,ENSFCAG00000014763,…
GO:BP	regulation of signaling	GO:0023051	0.00697617	2.15638	2411	812	180	14276	ENSFCAG00000023845,ENSFCAG00000000939,ENSFCAG00000015536,ENSFCAG00000028685,ENSFCAG00000022120,ENSFCAG00000015289,ENSFCAG00000006839,ENSFCAG00000012005,ENSFCAG00000006543,ENSFCAG00000003700,ENSFCAG00000001556,ENSFCAG00000027689,ENSFCAG00000004831,ENSFCAG00000012553,ENSFCAG00000002868,ENSFCAG00000014533,ENSFCAG00000011941,ENSFCAG00000026735,ENSFCAG00000029636,ENSFCAG00000000178,ENSFCAG00000011461,…
GO:BP	regulation of localization	GO:0032879	0.00704106	2.15236	1836	812	143	14276	ENSFCAG00000000939,ENSFCAG00000015536,ENSFCAG00000003700,ENSFCAG00000012828,ENSFCAG00000011280,ENSFCAG00000028065,ENSFCAG00000001556,ENSFCAG00000014533,ENSFCAG00000011941,ENSFCAG00000031909,ENSFCAG00000005059,ENSFCAG00000013500,ENSFCAG00000015492,ENSFCAG00000000080,ENSFCAG00000038541,ENSFCAG00000011147,ENSFCAG00000008717,ENSFCAG00000001624,ENSFCAG00000008898,ENSFCAG00000027698,ENSFCAG00000034944,…
GO:BP	negative regulation of signal transduction	GO:0009968	0.00778521	2.10873	890	812	79	14276	ENSFCAG00000015536,ENSFCAG00000027689,ENSFCAG00000004831,ENSFCAG00000011941,ENSFCAG00000026735,ENSFCAG00000029636,ENSFCAG00000027698,ENSFCAG00000009367,ENSFCAG00000033191,ENSFCAG00000021968,ENSFCAG00000018794,ENSFCAG00000012450,ENSFCAG00000033190,ENSFCAG00000026867,ENSFCAG00000025339,ENSFCAG00000014721,ENSFCAG00000000063,ENSFCAG00000037697,ENSFCAG00000046381,ENSFCAG00000011099,ENSFCAG00000000245,…
GO:BP	regulation of response to stimulus	GO:0048583	0.00778521	2.10873	2768	812	202	14276	ENSFCAG00000023845,ENSFCAG00000010408,ENSFCAG00000000939,ENSFCAG00000015536,ENSFCAG00000028685,ENSFCAG00000022120,ENSFCAG00000015289,ENSFCAG00000045902,ENSFCAG00000006839,ENSFCAG00000012005,ENSFCAG00000006543,ENSFCAG00000003700,ENSFCAG00000012828,ENSFCAG00000028065,ENSFCAG00000001556,ENSFCAG00000027689,ENSFCAG00000004831,ENSFCAG00000012553,ENSFCAG00000002868,ENSFCAG00000014533,ENSFCAG00000011941,…
GO:BP	regulation of cell communication	GO:0010646	0.00903506	2.04407	2395	812	178	14276	ENSFCAG00000023845,ENSFCAG00000000939,ENSFCAG00000015536,ENSFCAG00000028685,ENSFCAG00000022120,ENSFCAG00000015289,ENSFCAG00000006839,ENSFCAG00000012005,ENSFCAG00000006543,ENSFCAG00000003700,ENSFCAG00000001556,ENSFCAG00000027689,ENSFCAG00000004831,ENSFCAG00000012553,ENSFCAG00000002868,ENSFCAG00000014533,ENSFCAG00000011941,ENSFCAG00000026735,ENSFCAG00000029636,ENSFCAG00000000178,ENSFCAG00000011461,…
GO:BP	modification-dependent protein catabolic process	GO:0019941	0.00988071	2.00521	471	812	48	14276	ENSFCAG00000008668,ENSFCAG00000022205,ENSFCAG00000006368,ENSFCAG00000001954,ENSFCAG00000011941,ENSFCAG00000026735,ENSFCAG00000004503,ENSFCAG00000044111,ENSFCAG00000014246,ENSFCAG00000031864,ENSFCAG00000004069,ENSFCAG00000026076,ENSFCAG00000007266,ENSFCAG00000014617,ENSFCAG00000032581,ENSFCAG00000002568,ENSFCAG00000022049,ENSFCAG00000023857,ENSFCAG00000007897,ENSFCAG00000002182,ENSFCAG00000014763,…
GO:BP	transcription by RNA polymerase II	GO:0006366	0.0105864	1.97525	1611	812	127	14276	ENSFCAG00000042641,ENSFCAG00000023845,ENSFCAG00000001556,ENSFCAG00000004831,ENSFCAG00000024950,ENSFCAG00000011941,ENSFCAG00000029636,ENSFCAG00000042690,ENSFCAG00000004893,ENSFCAG00000011147,ENSFCAG00000045850,ENSFCAG00000002516,ENSFCAG00000001624,ENSFCAG00000004828,ENSFCAG00000005138,ENSFCAG00000009897,ENSFCAG00000009367,ENSFCAG00000026699,ENSFCAG00000006319,ENSFCAG00000003572,ENSFCAG00000015103,…
GO:BP	regulation of transcription by RNA polymerase II	GO:0006357	0.0114953	1.93948	1554	812	123	14276	ENSFCAG00000042641,ENSFCAG00000023845,ENSFCAG00000001556,ENSFCAG00000004831,ENSFCAG00000024950,ENSFCAG00000011941,ENSFCAG00000029636,ENSFCAG00000042690,ENSFCAG00000004893,ENSFCAG00000011147,ENSFCAG00000045850,ENSFCAG00000002516,ENSFCAG00000001624,ENSFCAG00000004828,ENSFCAG00000005138,ENSFCAG00000009897,ENSFCAG00000009367,ENSFCAG00000026699,ENSFCAG00000006319,ENSFCAG00000003572,ENSFCAG00000015103,…
GO:BP	establishment of localization	GO:0051234	0.0115231	1.93843	3379	812	238	14276	ENSFCAG00000009259,ENSFCAG00000007784,ENSFCAG00000001913,ENSFCAG00000000939,ENSFCAG00000001749,ENSFCAG00000031392,ENSFCAG00000012828,ENSFCAG00000011280,ENSFCAG00000004245,ENSFCAG00000028065,ENSFCAG00000033067,ENSFCAG00000004429,ENSFCAG00000043283,ENSFCAG00000001556,ENSFCAG00000023791,ENSFCAG00000037651,ENSFCAG00000027689,ENSFCAG00000014533,ENSFCAG00000011941,ENSFCAG00000026735,ENSFCAG00000029645,…
GO:BP	divalent metal ion transport	GO:0070838	0.0115231	1.93843	310	812	35	14276	ENSFCAG00000012828,ENSFCAG00000031909,ENSFCAG00000004031,ENSFCAG00000013500,ENSFCAG00000015492,ENSFCAG00000000080,ENSFCAG00000038541,ENSFCAG00000011147,ENSFCAG00000008717,ENSFCAG00000012937,ENSFCAG00000015741,ENSFCAG00000000764,ENSFCAG00000018633,ENSFCAG00000036489,ENSFCAG00000038903,ENSFCAG00000014030,ENSFCAG00000045298,ENSFCAG00000001105,ENSFCAG00000008287,ENSFCAG00000000725,ENSFCAG00000024723,…
GO:BP	proteasome-mediated ubiquitin-dependent protein catabolic process	GO:0043161	0.0115231	1.93843	309	812	35	14276	ENSFCAG00000008668,ENSFCAG00000022205,ENSFCAG00000006368,ENSFCAG00000001954,ENSFCAG00000011941,ENSFCAG00000004503,ENSFCAG00000014246,ENSFCAG00000031864,ENSFCAG00000004069,ENSFCAG00000026076,ENSFCAG00000007266,ENSFCAG00000014617,ENSFCAG00000032581,ENSFCAG00000022049,ENSFCAG00000002182,ENSFCAG00000014763,ENSFCAG00000003278,ENSFCAG00000022567,ENSFCAG00000001317,ENSFCAG00000028822,ENSFCAG00000002440,…
GO:BP	divalent inorganic cation transport	GO:0072511	0.0115231	1.93843	310	812	35	14276	ENSFCAG00000012828,ENSFCAG00000031909,ENSFCAG00000004031,ENSFCAG00000013500,ENSFCAG00000015492,ENSFCAG00000000080,ENSFCAG00000038541,ENSFCAG00000011147,ENSFCAG00000008717,ENSFCAG00000012937,ENSFCAG00000015741,ENSFCAG00000000764,ENSFCAG00000018633,ENSFCAG00000036489,ENSFCAG00000038903,ENSFCAG00000014030,ENSFCAG00000045298,ENSFCAG00000001105,ENSFCAG00000008287,ENSFCAG00000000725,ENSFCAG00000024723,…
GO:BP	proteolysis involved in cellular protein catabolic process	GO:0051603	0.011904	1.92431	558	812	54	14276	ENSFCAG00000009244,ENSFCAG00000008668,ENSFCAG00000022205,ENSFCAG00000006368,ENSFCAG00000001954,ENSFCAG00000011941,ENSFCAG00000026735,ENSFCAG00000043362,ENSFCAG00000004503,ENSFCAG00000044111,ENSFCAG00000007389,ENSFCAG00000014246,ENSFCAG00000031864,ENSFCAG00000004069,ENSFCAG00000026076,ENSFCAG00000007266,ENSFCAG00000014617,ENSFCAG00000032581,ENSFCAG00000002568,ENSFCAG00000022049,ENSFCAG00000023857,…
GO:BP	Wnt signaling pathway	GO:0016055	0.0128759	1.89022	300	812	34	14276	ENSFCAG00000001588,ENSFCAG00000001624,ENSFCAG00000033190,ENSFCAG00000025339,ENSFCAG00000000063,ENSFCAG00000019220,ENSFCAG00000033140,ENSFCAG00000005027,ENSFCAG00000045255,ENSFCAG00000033108,ENSFCAG00000011470,ENSFCAG00000004558,ENSFCAG00000023857,ENSFCAG00000008064,ENSFCAG00000045078,ENSFCAG00000000253,ENSFCAG00000014763,ENSFCAG00000012267,ENSFCAG00000005782,ENSFCAG00000024654,ENSFCAG00000005354,…
GO:BP	cell-cell signaling by wnt	GO:0198738	0.0138465	1.85866	302	812	34	14276	ENSFCAG00000001588,ENSFCAG00000001624,ENSFCAG00000033190,ENSFCAG00000025339,ENSFCAG00000000063,ENSFCAG00000019220,ENSFCAG00000033140,ENSFCAG00000005027,ENSFCAG00000045255,ENSFCAG00000033108,ENSFCAG00000011470,ENSFCAG00000004558,ENSFCAG00000023857,ENSFCAG00000008064,ENSFCAG00000045078,ENSFCAG00000000253,ENSFCAG00000014763,ENSFCAG00000012267,ENSFCAG00000005782,ENSFCAG00000024654,ENSFCAG00000005354,…
GO:BP	proteasomal protein catabolic process	GO:0010498	0.0138465	1.85866	365	812	39	14276	ENSFCAG00000009244,ENSFCAG00000008668,ENSFCAG00000022205,ENSFCAG00000006368,ENSFCAG00000001954,ENSFCAG00000011941,ENSFCAG00000043362,ENSFCAG00000004503,ENSFCAG00000014246,ENSFCAG00000031864,ENSFCAG00000004069,ENSFCAG00000026076,ENSFCAG00000007266,ENSFCAG00000014617,ENSFCAG00000032581,ENSFCAG00000022049,ENSFCAG00000002182,ENSFCAG00000014763,ENSFCAG00000013130,ENSFCAG00000027866,ENSFCAG00000003278,…
GO:BP	modification-dependent macromolecule catabolic process	GO:0043632	0.0138465	1.85866	482	812	48	14276	ENSFCAG00000008668,ENSFCAG00000022205,ENSFCAG00000006368,ENSFCAG00000001954,ENSFCAG00000011941,ENSFCAG00000026735,ENSFCAG00000004503,ENSFCAG00000044111,ENSFCAG00000014246,ENSFCAG00000031864,ENSFCAG00000004069,ENSFCAG00000026076,ENSFCAG00000007266,ENSFCAG00000014617,ENSFCAG00000032581,ENSFCAG00000002568,ENSFCAG00000022049,ENSFCAG00000023857,ENSFCAG00000007897,ENSFCAG00000002182,ENSFCAG00000014763,…
GO:BP	protein modification by small protein conjugation or removal	GO:0070647	0.0140259	1.85307	646	812	60	14276	ENSFCAG00000008668,ENSFCAG00000022205,ENSFCAG00000006368,ENSFCAG00000011941,ENSFCAG00000026735,ENSFCAG00000031909,ENSFCAG00000043362,ENSFCAG00000009367,ENSFCAG00000021968,ENSFCAG00000043178,ENSFCAG00000014246,ENSFCAG00000031864,ENSFCAG00000000245,ENSFCAG00000032581,ENSFCAG00000002568,ENSFCAG00000001734,ENSFCAG00000023951,ENSFCAG00000029905,ENSFCAG00000033794,ENSFCAG00000013801,ENSFCAG00000022049,…
GO:BP	cellular protein catabolic process	GO:0044257	0.0164297	1.78437	595	812	56	14276	ENSFCAG00000009244,ENSFCAG00000008668,ENSFCAG00000022205,ENSFCAG00000006368,ENSFCAG00000001954,ENSFCAG00000011941,ENSFCAG00000026735,ENSFCAG00000043362,ENSFCAG00000004503,ENSFCAG00000044111,ENSFCAG00000009367,ENSFCAG00000007389,ENSFCAG00000014246,ENSFCAG00000031864,ENSFCAG00000004069,ENSFCAG00000026076,ENSFCAG00000007266,ENSFCAG00000014617,ENSFCAG00000032581,ENSFCAG00000002568,ENSFCAG00000022049,…
GO:BP	cell development	GO:0048468	0.0176154	1.75411	1518	812	119	14276	ENSFCAG00000012982,ENSFCAG00000032144,ENSFCAG00000015536,ENSFCAG00000022120,ENSFCAG00000006543,ENSFCAG00000033553,ENSFCAG00000001556,ENSFCAG00000004831,ENSFCAG00000012553,ENSFCAG00000031909,ENSFCAG00000011461,ENSFCAG00000015453,ENSFCAG00000005059,ENSFCAG00000019152,ENSFCAG00000002535,ENSFCAG00000030194,ENSFCAG00000013129,ENSFCAG00000039189,ENSFCAG00000004159,ENSFCAG00000004661,ENSFCAG00000014721,…
GO:BP	cellular component morphogenesis	GO:0032989	0.0176154	1.75411	822	812	72	14276	ENSFCAG00000032144,ENSFCAG00000006543,ENSFCAG00000001556,ENSFCAG00000004831,ENSFCAG00000011461,ENSFCAG00000005059,ENSFCAG00000011581,ENSFCAG00000034944,ENSFCAG00000013129,ENSFCAG00000004159,ENSFCAG00000000063,ENSFCAG00000022135,ENSFCAG00000032581,ENSFCAG00000009452,ENSFCAG00000005489,ENSFCAG00000033140,ENSFCAG00000023383,ENSFCAG00000002568,ENSFCAG00000011470,ENSFCAG00000000066,ENSFCAG00000029905,…
GO:BP	organelle organization	GO:0006996	0.0182146	1.73958	2779	812	199	14276	ENSFCAG00000012982,ENSFCAG00000032144,ENSFCAG00000015289,ENSFCAG00000001749,ENSFCAG00000003700,ENSFCAG00000031392,ENSFCAG00000027689,ENSFCAG00000004831,ENSFCAG00000002122,ENSFCAG00000012553,ENSFCAG00000002868,ENSFCAG00000014533,ENSFCAG00000011941,ENSFCAG00000013637,ENSFCAG00000029645,ENSFCAG00000031909,ENSFCAG00000004503,ENSFCAG00000013070,ENSFCAG00000011461,ENSFCAG00000001748,ENSFCAG00000011581,…
GO:BP	regulation of skeletal muscle fiber differentiation	GO:1902809	0.020097	1.69687	3	812	3	14276	ENSFCAG00000026867,ENSFCAG00000024818,ENSFCAG00000046251
GO:BP	protein ubiquitination	GO:0016567	0.020097	1.69687	506	812	49	14276	ENSFCAG00000008668,ENSFCAG00000022205,ENSFCAG00000006368,ENSFCAG00000011941,ENSFCAG00000026735,ENSFCAG00000031909,ENSFCAG00000043362,ENSFCAG00000009367,ENSFCAG00000021968,ENSFCAG00000014246,ENSFCAG00000032581,ENSFCAG00000002568,ENSFCAG00000001734,ENSFCAG00000029905,ENSFCAG00000013801,ENSFCAG00000022049,ENSFCAG00000005998,ENSFCAG00000009702,ENSFCAG00000007897,ENSFCAG00000034434,ENSFCAG00000004561,…
GO:BP	anterograde trans-synaptic signaling	GO:0098916	0.0214059	1.66947	402	812	41	14276	ENSFCAG00000028685,ENSFCAG00000043283,ENSFCAG00000001556,ENSFCAG00000000178,ENSFCAG00000011461,ENSFCAG00000015492,ENSFCAG00000000080,ENSFCAG00000010133,ENSFCAG00000014103,ENSFCAG00000001932,ENSFCAG00000001930,ENSFCAG00000001933,ENSFCAG00000002429,ENSFCAG00000011417,ENSFCAG00000008636,ENSFCAG00000000764,ENSFCAG00000005575,ENSFCAG00000039418,ENSFCAG00000005468,ENSFCAG00000023738,ENSFCAG00000010459,…
GO:BP	cellular response to organic substance	GO:0071310	0.0214059	1.66947	1560	812	121	14276	ENSFCAG00000001913,ENSFCAG00000032144,ENSFCAG00000023845,ENSFCAG00000000939,ENSFCAG00000015536,ENSFCAG00000022677,ENSFCAG00000009244,ENSFCAG00000033553,ENSFCAG00000008668,ENSFCAG00000001556,ENSFCAG00000037651,ENSFCAG00000011941,ENSFCAG00000029636,ENSFCAG00000004503,ENSFCAG00000004893,ENSFCAG00000011147,ENSFCAG00000045383,ENSFCAG00000009367,ENSFCAG00000021968,ENSFCAG00000032380,ENSFCAG00000027515,…
GO:BP	chemical synaptic transmission	GO:0007268	0.0214059	1.66947	402	812	41	14276	ENSFCAG00000028685,ENSFCAG00000043283,ENSFCAG00000001556,ENSFCAG00000000178,ENSFCAG00000011461,ENSFCAG00000015492,ENSFCAG00000000080,ENSFCAG00000010133,ENSFCAG00000014103,ENSFCAG00000001932,ENSFCAG00000001930,ENSFCAG00000001933,ENSFCAG00000002429,ENSFCAG00000011417,ENSFCAG00000008636,ENSFCAG00000000764,ENSFCAG00000005575,ENSFCAG00000039418,ENSFCAG00000005468,ENSFCAG00000023738,ENSFCAG00000010459,…
GO:BP	protein modification by small protein conjugation	GO:0032446	0.0216171	1.6652	550	812	52	14276	ENSFCAG00000008668,ENSFCAG00000022205,ENSFCAG00000006368,ENSFCAG00000011941,ENSFCAG00000026735,ENSFCAG00000031909,ENSFCAG00000043362,ENSFCAG00000009367,ENSFCAG00000021968,ENSFCAG00000014246,ENSFCAG00000031864,ENSFCAG00000000245,ENSFCAG00000032581,ENSFCAG00000002568,ENSFCAG00000001734,ENSFCAG00000023951,ENSFCAG00000029905,ENSFCAG00000013801,ENSFCAG00000022049,ENSFCAG00000005998,ENSFCAG00000009702,…
GO:BP	negative regulation of macromolecule metabolic process	GO:0010605	0.0217406	1.66273	1856	812	140	14276	ENSFCAG00000042641,ENSFCAG00000009244,ENSFCAG00000004429,ENSFCAG00000001556,ENSFCAG00000004831,ENSFCAG00000024950,ENSFCAG00000011941,ENSFCAG00000029636,ENSFCAG00000029645,ENSFCAG00000031909,ENSFCAG00000043362,ENSFCAG00000004503,ENSFCAG00000013070,ENSFCAG00000042690,ENSFCAG00000045850,ENSFCAG00000002516,ENSFCAG00000001624,ENSFCAG00000009367,ENSFCAG00000026699,ENSFCAG00000012805,ENSFCAG00000025745,…
GO:BP	heart development	GO:0007507	0.0224546	1.6487	417	812	42	14276	ENSFCAG00000033553,ENSFCAG00000004245,ENSFCAG00000031909,ENSFCAG00000005059,ENSFCAG00000012943,ENSFCAG00000004661,ENSFCAG00000014721,ENSFCAG00000000245,ENSFCAG00000044185,ENSFCAG00000013612,ENSFCAG00000015036,ENSFCAG00000037155,ENSFCAG00000002156,ENSFCAG00000028784,ENSFCAG00000003030,ENSFCAG00000011470,ENSFCAG00000005274,ENSFCAG00000011776,ENSFCAG00000013804,ENSFCAG00000028389,ENSFCAG00000011912,…
GO:BP	regulation of metabolic process	GO:0019222	0.0244272	1.61213	4656	812	311	14276	ENSFCAG00000042641,ENSFCAG00000012982,ENSFCAG00000023845,ENSFCAG00000022120,ENSFCAG00000001749,ENSFCAG00000009244,ENSFCAG00000033553,ENSFCAG00000022205,ENSFCAG00000011280,ENSFCAG00000004429,ENSFCAG00000043283,ENSFCAG00000001556,ENSFCAG00000006368,ENSFCAG00000004831,ENSFCAG00000024950,ENSFCAG00000011941,ENSFCAG00000029636,ENSFCAG00000013637,ENSFCAG00000029645,ENSFCAG00000031909,ENSFCAG00000003304,…
GO:BP	trans-synaptic signaling	GO:0099537	0.0254428	1.59444	408	812	41	14276	ENSFCAG00000028685,ENSFCAG00000043283,ENSFCAG00000001556,ENSFCAG00000000178,ENSFCAG00000011461,ENSFCAG00000015492,ENSFCAG00000000080,ENSFCAG00000010133,ENSFCAG00000014103,ENSFCAG00000001932,ENSFCAG00000001930,ENSFCAG00000001933,ENSFCAG00000002429,ENSFCAG00000011417,ENSFCAG00000008636,ENSFCAG00000000764,ENSFCAG00000005575,ENSFCAG00000039418,ENSFCAG00000005468,ENSFCAG00000023738,ENSFCAG00000010459,…
GO:BP	protein polyubiquitination	GO:0000209	0.0254428	1.59444	148	812	20	14276	ENSFCAG00000008668,ENSFCAG00000022205,ENSFCAG00000006368,ENSFCAG00000002568,ENSFCAG00000001734,ENSFCAG00000029905,ENSFCAG00000034434,ENSFCAG00000004561,ENSFCAG00000009309,ENSFCAG00000003278,ENSFCAG00000009412,ENSFCAG00000001419,ENSFCAG00000015062,ENSFCAG00000030664,ENSFCAG00000031235,ENSFCAG00000039904,ENSFCAG00000033193,ENSFCAG00000007602,ENSFCAG00000010582,ENSFCAG00000002959
GO:BP	regulation of catalytic activity	GO:0050790	0.0254428	1.59444	1555	812	120	14276	ENSFCAG00000012982,ENSFCAG00000023845,ENSFCAG00000022120,ENSFCAG00000001632,ENSFCAG00000011280,ENSFCAG00000001556,ENSFCAG00000027689,ENSFCAG00000013062,ENSFCAG00000002122,ENSFCAG00000012553,ENSFCAG00000014533,ENSFCAG00000011941,ENSFCAG00000013637,ENSFCAG00000029645,ENSFCAG00000043362,ENSFCAG00000005059,ENSFCAG00000029927,ENSFCAG00000044111,ENSFCAG00000011581,ENSFCAG00000008717,ENSFCAG00000046690,…
GO:BP	synaptic signaling	GO:0099536	0.0254428	1.59444	408	812	41	14276	ENSFCAG00000028685,ENSFCAG00000043283,ENSFCAG00000001556,ENSFCAG00000000178,ENSFCAG00000011461,ENSFCAG00000015492,ENSFCAG00000000080,ENSFCAG00000010133,ENSFCAG00000014103,ENSFCAG00000001932,ENSFCAG00000001930,ENSFCAG00000001933,ENSFCAG00000002429,ENSFCAG00000011417,ENSFCAG00000008636,ENSFCAG00000000764,ENSFCAG00000005575,ENSFCAG00000039418,ENSFCAG00000005468,ENSFCAG00000023738,ENSFCAG00000010459,…
GO:BP	protein catabolic process	GO:0030163	0.0254428	1.59444	710	812	63	14276	ENSFCAG00000009244,ENSFCAG00000008668,ENSFCAG00000022205,ENSFCAG00000006368,ENSFCAG00000001954,ENSFCAG00000011941,ENSFCAG00000026735,ENSFCAG00000000178,ENSFCAG00000043362,ENSFCAG00000004503,ENSFCAG00000044111,ENSFCAG00000009367,ENSFCAG00000007389,ENSFCAG00000014246,ENSFCAG00000031864,ENSFCAG00000004069,ENSFCAG00000026076,ENSFCAG00000007266,ENSFCAG00000014617,ENSFCAG00000032581,ENSFCAG00000005468,…
GO:BP	coenzyme biosynthetic process	GO:0009108	0.0294857	1.53039	139	812	19	14276	ENSFCAG00000002309,ENSFCAG00000000586,ENSFCAG00000039104,ENSFCAG00000007529,ENSFCAG00000004927,ENSFCAG00000005980,ENSFCAG00000044279,ENSFCAG00000036489,ENSFCAG00000003030,ENSFCAG00000002182,ENSFCAG00000009521,ENSFCAG00000002206,ENSFCAG00000009633,ENSFCAG00000008432,ENSFCAG00000006934,ENSFCAG00000005394,ENSFCAG00000002832,ENSFCAG00000030274,ENSFCAG00000038736
GO:BP	response to mitochondrial depolarisation	GO:0098780	0.0300667	1.52191	18	812	6	14276	ENSFCAG00000013637,ENSFCAG00000029645,ENSFCAG00000002568,ENSFCAG00000005980,ENSFCAG00000000076,ENSFCAG00000015062
GO:BP	cellular response to chemical stimulus	GO:0070887	0.0331336	1.47973	1943	812	144	14276	ENSFCAG00000001913,ENSFCAG00000032144,ENSFCAG00000023845,ENSFCAG00000000939,ENSFCAG00000015536,ENSFCAG00000022677,ENSFCAG00000001749,ENSFCAG00000009244,ENSFCAG00000033553,ENSFCAG00000008668,ENSFCAG00000012828,ENSFCAG00000001556,ENSFCAG00000037651,ENSFCAG00000024950,ENSFCAG00000011941,ENSFCAG00000029636,ENSFCAG00000040645,ENSFCAG00000025535,ENSFCAG00000004503,ENSFCAG00000004893,ENSFCAG00000011147,…
GO:BP	transport	GO:0006810	0.0332473	1.47824	3265	812	226	14276	ENSFCAG00000009259,ENSFCAG00000007784,ENSFCAG00000001913,ENSFCAG00000000939,ENSFCAG00000001749,ENSFCAG00000031392,ENSFCAG00000012828,ENSFCAG00000011280,ENSFCAG00000004245,ENSFCAG00000028065,ENSFCAG00000033067,ENSFCAG00000004429,ENSFCAG00000043283,ENSFCAG00000001556,ENSFCAG00000023791,ENSFCAG00000037651,ENSFCAG00000027689,ENSFCAG00000014533,ENSFCAG00000011941,ENSFCAG00000026735,ENSFCAG00000029645,…
GO:BP	phosphorylation	GO:0016310	0.0332473	1.47824	1725	812	130	14276	ENSFCAG00000012982,ENSFCAG00000023845,ENSFCAG00000022120,ENSFCAG00000003700,ENSFCAG00000001556,ENSFCAG00000011941,ENSFCAG00000029636,ENSFCAG00000013637,ENSFCAG00000029645,ENSFCAG00000002604,ENSFCAG00000029927,ENSFCAG00000044111,ENSFCAG00000011147,ENSFCAG00000001588,ENSFCAG00000046690,ENSFCAG00000001624,ENSFCAG00000026008,ENSFCAG00000004828,ENSFCAG00000029610,ENSFCAG00000005138,ENSFCAG00000019152,…
GO:BP	animal organ development	GO:0048513	0.0336386	1.47316	2342	812	169	14276	ENSFCAG00000012982,ENSFCAG00000023845,ENSFCAG00000010408,ENSFCAG00000025759,ENSFCAG00000045902,ENSFCAG00000003700,ENSFCAG00000033553,ENSFCAG00000012828,ENSFCAG00000004245,ENSFCAG00000001556,ENSFCAG00000004831,ENSFCAG00000014533,ENSFCAG00000029636,ENSFCAG00000031909,ENSFCAG00000004503,ENSFCAG00000005059,ENSFCAG00000030303,ENSFCAG00000004893,ENSFCAG00000000794,ENSFCAG00000026699,ENSFCAG00000007543,…
GO:BP	regulation of macromolecule metabolic process	GO:0060255	0.0338315	1.47068	4332	812	290	14276	ENSFCAG00000042641,ENSFCAG00000012982,ENSFCAG00000023845,ENSFCAG00000022120,ENSFCAG00000001749,ENSFCAG00000009244,ENSFCAG00000033553,ENSFCAG00000022205,ENSFCAG00000011280,ENSFCAG00000004429,ENSFCAG00000043283,ENSFCAG00000001556,ENSFCAG00000006368,ENSFCAG00000004831,ENSFCAG00000024950,ENSFCAG00000011941,ENSFCAG00000029636,ENSFCAG00000013637,ENSFCAG00000029645,ENSFCAG00000031909,ENSFCAG00000003304,…
GO:BP	protein phosphorylation	GO:0006468	0.0354794	1.45002	1436	812	111	14276	ENSFCAG00000012982,ENSFCAG00000023845,ENSFCAG00000022120,ENSFCAG00000003700,ENSFCAG00000001556,ENSFCAG00000011941,ENSFCAG00000029636,ENSFCAG00000013637,ENSFCAG00000029645,ENSFCAG00000002604,ENSFCAG00000029927,ENSFCAG00000044111,ENSFCAG00000011147,ENSFCAG00000001588,ENSFCAG00000046690,ENSFCAG00000001624,ENSFCAG00000026008,ENSFCAG00000004828,ENSFCAG00000029610,ENSFCAG00000005138,ENSFCAG00000019152,…
GO:BP	cellular protein metabolic process	GO:0044267	0.0391245	1.40755	3890	812	263	14276	ENSFCAG00000012982,ENSFCAG00000023845,ENSFCAG00000022120,ENSFCAG00000013803,ENSFCAG00000001749,ENSFCAG00000003700,ENSFCAG00000009244,ENSFCAG00000008668,ENSFCAG00000022205,ENSFCAG00000001556,ENSFCAG00000006368,ENSFCAG00000001954,ENSFCAG00000011941,ENSFCAG00000026735,ENSFCAG00000029636,ENSFCAG00000013637,ENSFCAG00000029645,ENSFCAG00000031909,ENSFCAG00000043362,ENSFCAG00000004503,ENSFCAG00000002604,…
GO:BP	somitogenesis	GO:0001756	0.0393606	1.40494	60	812	11	14276	ENSFCAG00000033553,ENSFCAG00000026699,ENSFCAG00000004661,ENSFCAG00000022135,ENSFCAG00000028542,ENSFCAG00000000253,ENSFCAG00000007884,ENSFCAG00000025483,ENSFCAG00000033649,ENSFCAG00000027081,ENSFCAG00000005257
GO:BP	mitotic cell cycle process	GO:1903047	0.0407628	1.38974	502	812	47	14276	ENSFCAG00000031392,ENSFCAG00000001556,ENSFCAG00000012553,ENSFCAG00000044111,ENSFCAG00000046690,ENSFCAG00000001624,ENSFCAG00000026008,ENSFCAG00000029610,ENSFCAG00000019152,ENSFCAG00000009367,ENSFCAG00000012805,ENSFCAG00000015103,ENSFCAG00000025745,ENSFCAG00000033191,ENSFCAG00000031450,ENSFCAG00000000924,ENSFCAG00000000566,ENSFCAG00000014246,ENSFCAG00000025339,ENSFCAG00000007794,ENSFCAG00000007266,…
GO:BP	regulation of cellular metabolic process	GO:0031323	0.0408014	1.38932	4348	812	290	14276	ENSFCAG00000042641,ENSFCAG00000012982,ENSFCAG00000023845,ENSFCAG00000022120,ENSFCAG00000001749,ENSFCAG00000009244,ENSFCAG00000022205,ENSFCAG00000011280,ENSFCAG00000004429,ENSFCAG00000001556,ENSFCAG00000004831,ENSFCAG00000024950,ENSFCAG00000011941,ENSFCAG00000029636,ENSFCAG00000013637,ENSFCAG00000029645,ENSFCAG00000031909,ENSFCAG00000003304,ENSFCAG00000043362,ENSFCAG00000004503,ENSFCAG00000013070,…
GO:BP	response to growth factor	GO:0070848	0.0408014	1.38932	448	812	43	14276	ENSFCAG00000023845,ENSFCAG00000015536,ENSFCAG00000011147,ENSFCAG00000027515,ENSFCAG00000018794,ENSFCAG00000004661,ENSFCAG00000006717,ENSFCAG00000022135,ENSFCAG00000040439,ENSFCAG00000019220,ENSFCAG00000013612,ENSFCAG00000016224,ENSFCAG00000007838,ENSFCAG00000033140,ENSFCAG00000037811,ENSFCAG00000002726,ENSFCAG00000037155,ENSFCAG00000002568,ENSFCAG00000003030,ENSFCAG00000004558,ENSFCAG00000009679,…
GO:BP	biological regulation	GO:0065007	0.0413329	1.3837	9281	812	571	14276	ENSFCAG00000042641,ENSFCAG00000009259,ENSFCAG00000012982,ENSFCAG00000001913,ENSFCAG00000023845,ENSFCAG00000010408,ENSFCAG00000000939,ENSFCAG00000015536,ENSFCAG00000015677,ENSFCAG00000014334,ENSFCAG00000025759,ENSFCAG00000022677,ENSFCAG00000028685,ENSFCAG00000022120,ENSFCAG00000015289,ENSFCAG00000001632,ENSFCAG00000001749,ENSFCAG00000045902,ENSFCAG00000006839,ENSFCAG00000012005,ENSFCAG00000006543,…
GO:BP	mitotic cell cycle	GO:0000278	0.0431753	1.36476	616	812	55	14276	ENSFCAG00000042641,ENSFCAG00000031392,ENSFCAG00000001556,ENSFCAG00000012553,ENSFCAG00000044111,ENSFCAG00000046690,ENSFCAG00000001624,ENSFCAG00000026008,ENSFCAG00000029610,ENSFCAG00000019152,ENSFCAG00000009367,ENSFCAG00000012805,ENSFCAG00000015103,ENSFCAG00000025745,ENSFCAG00000033191,ENSFCAG00000031450,ENSFCAG00000000924,ENSFCAG00000000566,ENSFCAG00000014246,ENSFCAG00000025339,ENSFCAG00000007794,…
GO:BP	cellular macromolecule catabolic process	GO:0044265	0.0453349	1.34357	804	812	68	14276	ENSFCAG00000009244,ENSFCAG00000008668,ENSFCAG00000022205,ENSFCAG00000006368,ENSFCAG00000001954,ENSFCAG00000011941,ENSFCAG00000026735,ENSFCAG00000043362,ENSFCAG00000004503,ENSFCAG00000044111,ENSFCAG00000009367,ENSFCAG00000032380,ENSFCAG00000029266,ENSFCAG00000000664,ENSFCAG00000007389,ENSFCAG00000014246,ENSFCAG00000003903,ENSFCAG00000001895,ENSFCAG00000031864,ENSFCAG00000004069,ENSFCAG00000026076,…
GO:BP	astrocyte development	GO:0014002	0.0469937	1.32796	20	812	6	14276	ENSFCAG00000001556,ENSFCAG00000004661,ENSFCAG00000000764,ENSFCAG00000007787,ENSFCAG00000005468,ENSFCAG00000000185
GO:BP	circulatory system development	GO:0072359	0.0489719	1.31005	778	812	66	14276	ENSFCAG00000015536,ENSFCAG00000015677,ENSFCAG00000003700,ENSFCAG00000033553,ENSFCAG00000011280,ENSFCAG00000004245,ENSFCAG00000031909,ENSFCAG00000005059,ENSFCAG00000026699,ENSFCAG00000018794,ENSFCAG00000012450,ENSFCAG00000012943,ENSFCAG00000004661,ENSFCAG00000014721,ENSFCAG00000000245,ENSFCAG00000044185,ENSFCAG00000013612,ENSFCAG00000016224,ENSFCAG00000033140,ENSFCAG00000015036,ENSFCAG00000023383,…
GO:BP	regulation of gene expression	GO:0010468	0.0489719	1.31005	3050	812	211	14276	ENSFCAG00000042641,ENSFCAG00000023845,ENSFCAG00000033553,ENSFCAG00000011280,ENSFCAG00000043283,ENSFCAG00000001556,ENSFCAG00000004831,ENSFCAG00000024950,ENSFCAG00000011941,ENSFCAG00000029636,ENSFCAG00000029645,ENSFCAG00000043362,ENSFCAG00000013070,ENSFCAG00000042690,ENSFCAG00000004893,ENSFCAG00000011147,ENSFCAG00000008717,ENSFCAG00000014593,ENSFCAG00000002030,ENSFCAG00000045850,ENSFCAG00000002516,…
GO:CC	intracellular	GO:0005622	1.31639e-05	4.88062	10963	828	679	14804	ENSFCAG00000002372,ENSFCAG00000042641,ENSFCAG00000009259,ENSFCAG00000012982,ENSFCAG00000001913,ENSFCAG00000002309,ENSFCAG00000032144,ENSFCAG00000045749,ENSFCAG00000023845,ENSFCAG00000000939,ENSFCAG00000015677,ENSFCAG00000014334,ENSFCAG00000025759,ENSFCAG00000028685,ENSFCAG00000022120,ENSFCAG00000015289,ENSFCAG00000013803,ENSFCAG00000001632,ENSFCAG00000001749,ENSFCAG00000006839,ENSFCAG00000005913,…
GO:CC	intracellular part	GO:0044424	9.27282e-05	4.03279	10496	828	649	14804	ENSFCAG00000002372,ENSFCAG00000042641,ENSFCAG00000009259,ENSFCAG00000012982,ENSFCAG00000001913,ENSFCAG00000002309,ENSFCAG00000032144,ENSFCAG00000045749,ENSFCAG00000023845,ENSFCAG00000000939,ENSFCAG00000015677,ENSFCAG00000015289,ENSFCAG00000013803,ENSFCAG00000001632,ENSFCAG00000001749,ENSFCAG00000006839,ENSFCAG00000005913,ENSFCAG00000012005,ENSFCAG00000006543,ENSFCAG00000009244,ENSFCAG00000033553,…
GO:CC	cell	GO:0005623	9.27282e-05	4.03279	12976	828	769	14804	ENSFCAG00000002372,ENSFCAG00000042641,ENSFCAG00000009259,ENSFCAG00000012982,ENSFCAG00000001913,ENSFCAG00000002309,ENSFCAG00000032144,ENSFCAG00000045749,ENSFCAG00000023845,ENSFCAG00000000939,ENSFCAG00000015536,ENSFCAG00000015677,ENSFCAG00000014334,ENSFCAG00000025759,ENSFCAG00000028685,ENSFCAG00000022120,ENSFCAG00000015289,ENSFCAG00000013803,ENSFCAG00000001632,ENSFCAG00000001749,ENSFCAG00000045902,…
GO:CC	cell part	GO:0044464	9.76555e-05	4.0103	12921	828	766	14804	ENSFCAG00000002372,ENSFCAG00000042641,ENSFCAG00000009259,ENSFCAG00000012982,ENSFCAG00000001913,ENSFCAG00000002309,ENSFCAG00000032144,ENSFCAG00000045749,ENSFCAG00000023845,ENSFCAG00000000939,ENSFCAG00000015536,ENSFCAG00000015677,ENSFCAG00000014334,ENSFCAG00000025759,ENSFCAG00000028685,ENSFCAG00000022120,ENSFCAG00000015289,ENSFCAG00000013803,ENSFCAG00000001632,ENSFCAG00000001749,ENSFCAG00000045902,…
GO:CC	nucleoplasm	GO:0005654	0.00247074	2.60717	2223	828	167	14804	ENSFCAG00000001913,ENSFCAG00000002309,ENSFCAG00000006543,ENSFCAG00000013062,ENSFCAG00000024950,ENSFCAG00000011941,ENSFCAG00000004503,ENSFCAG00000013070,ENSFCAG00000011461,ENSFCAG00000001748,ENSFCAG00000042883,ENSFCAG00000004893,ENSFCAG00000014593,ENSFCAG00000035695,ENSFCAG00000045850,ENSFCAG00000002516,ENSFCAG00000001624,ENSFCAG00000004828,ENSFCAG00000009897,ENSFCAG00000026699,ENSFCAG00000002535,…
GO:CC	organelle part	GO:0044422	0.00247074	2.60717	5960	828	390	14804	ENSFCAG00000042641,ENSFCAG00000009259,ENSFCAG00000001913,ENSFCAG00000002309,ENSFCAG00000032144,ENSFCAG00000045749,ENSFCAG00000015677,ENSFCAG00000013803,ENSFCAG00000005913,ENSFCAG00000006543,ENSFCAG00000008668,ENSFCAG00000011721,ENSFCAG00000011280,ENSFCAG00000028065,ENSFCAG00000001556,ENSFCAG00000023791,ENSFCAG00000013062,ENSFCAG00000004831,ENSFCAG00000012553,ENSFCAG00000024950,ENSFCAG00000032975,…
GO:CC	nuclear part	GO:0044428	0.00247074	2.60717	3293	828	233	14804	ENSFCAG00000042641,ENSFCAG00000001913,ENSFCAG00000002309,ENSFCAG00000005913,ENSFCAG00000006543,ENSFCAG00000001556,ENSFCAG00000013062,ENSFCAG00000024950,ENSFCAG00000032975,ENSFCAG00000011941,ENSFCAG00000029636,ENSFCAG00000003304,ENSFCAG00000004503,ENSFCAG00000013070,ENSFCAG00000011461,ENSFCAG00000001748,ENSFCAG00000042883,ENSFCAG00000004893,ENSFCAG00000011147,ENSFCAG00000014593,ENSFCAG00000035695,…
GO:CC	receptor complex	GO:0043235	0.00247074	2.60717	319	828	37	14804	ENSFCAG00000023845,ENSFCAG00000001749,ENSFCAG00000001556,ENSFCAG00000038541,ENSFCAG00000014103,ENSFCAG00000001932,ENSFCAG00000001930,ENSFCAG00000001933,ENSFCAG00000008636,ENSFCAG00000013612,ENSFCAG00000016224,ENSFCAG00000004539,ENSFCAG00000005575,ENSFCAG00000039418,ENSFCAG00000013992,ENSFCAG00000023738,ENSFCAG00000018633,ENSFCAG00000010459,ENSFCAG00000003030,ENSFCAG00000005415,ENSFCAG00000004558,…
GO:CC	cytosol	GO:0005829	0.00345362	2.46173	2532	828	185	14804	ENSFCAG00000002372,ENSFCAG00000012982,ENSFCAG00000001913,ENSFCAG00000002309,ENSFCAG00000015289,ENSFCAG00000013803,ENSFCAG00000001632,ENSFCAG00000001749,ENSFCAG00000005913,ENSFCAG00000012005,ENSFCAG00000009244,ENSFCAG00000011721,ENSFCAG00000012828,ENSFCAG00000011280,ENSFCAG00000004245,ENSFCAG00000028065,ENSFCAG00000006368,ENSFCAG00000024536,ENSFCAG00000012553,ENSFCAG00000014533,ENSFCAG00000032975,…
GO:CC	cytoplasm	GO:0005737	0.00347001	2.45967	7686	828	485	14804	ENSFCAG00000002372,ENSFCAG00000042641,ENSFCAG00000009259,ENSFCAG00000012982,ENSFCAG00000001913,ENSFCAG00000002309,ENSFCAG00000032144,ENSFCAG00000023845,ENSFCAG00000015289,ENSFCAG00000013803,ENSFCAG00000001632,ENSFCAG00000001749,ENSFCAG00000006839,ENSFCAG00000005913,ENSFCAG00000012005,ENSFCAG00000009244,ENSFCAG00000033553,ENSFCAG00000008668,ENSFCAG00000011721,ENSFCAG00000022205,ENSFCAG00000012828,…
GO:CC	nuclear lumen	GO:0031981	0.00412092	2.38501	2922	828	208	14804	ENSFCAG00000042641,ENSFCAG00000001913,ENSFCAG00000002309,ENSFCAG00000005913,ENSFCAG00000006543,ENSFCAG00000013062,ENSFCAG00000024950,ENSFCAG00000032975,ENSFCAG00000011941,ENSFCAG00000029636,ENSFCAG00000004503,ENSFCAG00000013070,ENSFCAG00000011461,ENSFCAG00000001748,ENSFCAG00000042883,ENSFCAG00000004893,ENSFCAG00000011147,ENSFCAG00000014593,ENSFCAG00000035695,ENSFCAG00000045850,ENSFCAG00000002516,…
GO:CC	integral component of plasma membrane	GO:0005887	0.00454022	2.34292	901	828	78	14804	ENSFCAG00000001913,ENSFCAG00000023845,ENSFCAG00000000939,ENSFCAG00000015677,ENSFCAG00000014334,ENSFCAG00000025759,ENSFCAG00000028685,ENSFCAG00000022120,ENSFCAG00000045902,ENSFCAG00000004031,ENSFCAG00000000178,ENSFCAG00000038541,ENSFCAG00000008717,ENSFCAG00000034944,ENSFCAG00000029853,ENSFCAG00000014103,ENSFCAG00000001932,ENSFCAG00000001930,ENSFCAG00000001933,ENSFCAG00000008619,ENSFCAG00000013129,…
GO:CC	intracellular organelle part	GO:0044446	0.00526425	2.27866	5774	828	375	14804	ENSFCAG00000042641,ENSFCAG00000009259,ENSFCAG00000001913,ENSFCAG00000002309,ENSFCAG00000032144,ENSFCAG00000045749,ENSFCAG00000015677,ENSFCAG00000013803,ENSFCAG00000005913,ENSFCAG00000006543,ENSFCAG00000008668,ENSFCAG00000011721,ENSFCAG00000011280,ENSFCAG00000028065,ENSFCAG00000001556,ENSFCAG00000023791,ENSFCAG00000013062,ENSFCAG00000004831,ENSFCAG00000012553,ENSFCAG00000024950,ENSFCAG00000032975,…
GO:CC	transferase complex	GO:1990234	0.00612109	2.21317	643	828	59	14804	ENSFCAG00000023845,ENSFCAG00000022205,ENSFCAG00000001954,ENSFCAG00000013637,ENSFCAG00000029645,ENSFCAG00000031909,ENSFCAG00000003304,ENSFCAG00000001748,ENSFCAG00000045850,ENSFCAG00000046690,ENSFCAG00000001624,ENSFCAG00000026008,ENSFCAG00000004828,ENSFCAG00000029610,ENSFCAG00000005138,ENSFCAG00000009897,ENSFCAG00000003572,ENSFCAG00000021968,ENSFCAG00000000566,ENSFCAG00000014246,ENSFCAG00000012811,…
GO:CC	organelle	GO:0043226	0.00612109	2.21317	9188	828	564	14804	ENSFCAG00000002372,ENSFCAG00000042641,ENSFCAG00000009259,ENSFCAG00000001913,ENSFCAG00000002309,ENSFCAG00000032144,ENSFCAG00000045749,ENSFCAG00000000939,ENSFCAG00000015677,ENSFCAG00000015289,ENSFCAG00000013803,ENSFCAG00000006839,ENSFCAG00000005913,ENSFCAG00000012005,ENSFCAG00000006543,ENSFCAG00000008668,ENSFCAG00000011721,ENSFCAG00000011280,ENSFCAG00000004245,ENSFCAG00000028065,ENSFCAG00000033067,…
GO:CC	organelle lumen	GO:0043233	0.0094956	2.02248	3172	828	219	14804	ENSFCAG00000042641,ENSFCAG00000001913,ENSFCAG00000002309,ENSFCAG00000005913,ENSFCAG00000006543,ENSFCAG00000001556,ENSFCAG00000013062,ENSFCAG00000024950,ENSFCAG00000032975,ENSFCAG00000011941,ENSFCAG00000029636,ENSFCAG00000004503,ENSFCAG00000013070,ENSFCAG00000011461,ENSFCAG00000001748,ENSFCAG00000042883,ENSFCAG00000004893,ENSFCAG00000011147,ENSFCAG00000014593,ENSFCAG00000035695,ENSFCAG00000045850,…
GO:CC	intrinsic component of plasma membrane	GO:0031226	0.0094956	2.02248	947	828	79	14804	ENSFCAG00000001913,ENSFCAG00000023845,ENSFCAG00000000939,ENSFCAG00000015677,ENSFCAG00000014334,ENSFCAG00000025759,ENSFCAG00000028685,ENSFCAG00000022120,ENSFCAG00000045902,ENSFCAG00000004031,ENSFCAG00000000178,ENSFCAG00000038541,ENSFCAG00000008717,ENSFCAG00000034944,ENSFCAG00000029853,ENSFCAG00000014103,ENSFCAG00000001932,ENSFCAG00000001930,ENSFCAG00000001933,ENSFCAG00000008619,ENSFCAG00000013129,…
GO:CC	membrane-enclosed lumen	GO:0031974	0.0094956	2.02248	3172	828	219	14804	ENSFCAG00000042641,ENSFCAG00000001913,ENSFCAG00000002309,ENSFCAG00000005913,ENSFCAG00000006543,ENSFCAG00000001556,ENSFCAG00000013062,ENSFCAG00000024950,ENSFCAG00000032975,ENSFCAG00000011941,ENSFCAG00000029636,ENSFCAG00000004503,ENSFCAG00000013070,ENSFCAG00000011461,ENSFCAG00000001748,ENSFCAG00000042883,ENSFCAG00000004893,ENSFCAG00000011147,ENSFCAG00000014593,ENSFCAG00000035695,ENSFCAG00000045850,…
GO:CC	intracellular organelle lumen	GO:0070013	0.0094956	2.02248	3172	828	219	14804	ENSFCAG00000042641,ENSFCAG00000001913,ENSFCAG00000002309,ENSFCAG00000005913,ENSFCAG00000006543,ENSFCAG00000001556,ENSFCAG00000013062,ENSFCAG00000024950,ENSFCAG00000032975,ENSFCAG00000011941,ENSFCAG00000029636,ENSFCAG00000004503,ENSFCAG00000013070,ENSFCAG00000011461,ENSFCAG00000001748,ENSFCAG00000042883,ENSFCAG00000004893,ENSFCAG00000011147,ENSFCAG00000014593,ENSFCAG00000035695,ENSFCAG00000045850,…
GO:CC	transferase complex, transferring phosphorus-containing groups	GO:0061695	0.00986308	2.00599	220	828	26	14804	ENSFCAG00000023845,ENSFCAG00000013637,ENSFCAG00000029645,ENSFCAG00000046690,ENSFCAG00000001624,ENSFCAG00000026008,ENSFCAG00000004828,ENSFCAG00000029610,ENSFCAG00000005138,ENSFCAG00000009897,ENSFCAG00000003572,ENSFCAG00000021968,ENSFCAG00000000566,ENSFCAG00000013696,ENSFCAG00000003030,ENSFCAG00000009806,ENSFCAG00000013081,ENSFCAG00000027816,ENSFCAG00000007797,ENSFCAG00000013360,ENSFCAG00000005346,…
GO:CC	nuclear envelope	GO:0005635	0.00998708	2.00056	283	828	31	14804	ENSFCAG00000001913,ENSFCAG00000001556,ENSFCAG00000031450,ENSFCAG00000012943,ENSFCAG00000023583,ENSFCAG00000002850,ENSFCAG00000003030,ENSFCAG00000030327,ENSFCAG00000007002,ENSFCAG00000000444,ENSFCAG00000023994,ENSFCAG00000005274,ENSFCAG00000011776,ENSFCAG00000008534,ENSFCAG00000000268,ENSFCAG00000000965,ENSFCAG00000014763,ENSFCAG00000025776,ENSFCAG00000012502,ENSFCAG00000007849,ENSFCAG00000008856,…
GO:CC	membrane-bounded organelle	GO:0043227	0.0103649	1.98444	7969	828	494	14804	ENSFCAG00000042641,ENSFCAG00000009259,ENSFCAG00000001913,ENSFCAG00000002309,ENSFCAG00000032144,ENSFCAG00000006839,ENSFCAG00000005913,ENSFCAG00000012005,ENSFCAG00000006543,ENSFCAG00000008668,ENSFCAG00000011721,ENSFCAG00000011280,ENSFCAG00000004245,ENSFCAG00000028065,ENSFCAG00000033067,ENSFCAG00000043283,ENSFCAG00000001556,ENSFCAG00000023791,ENSFCAG00000013062,ENSFCAG00000024536,ENSFCAG00000014533,…
GO:CC	intracellular organelle	GO:0043229	0.0138789	1.85765	8978	828	548	14804	ENSFCAG00000002372,ENSFCAG00000042641,ENSFCAG00000009259,ENSFCAG00000001913,ENSFCAG00000002309,ENSFCAG00000032144,ENSFCAG00000045749,ENSFCAG00000000939,ENSFCAG00000015677,ENSFCAG00000015289,ENSFCAG00000013803,ENSFCAG00000006839,ENSFCAG00000005913,ENSFCAG00000012005,ENSFCAG00000006543,ENSFCAG00000008668,ENSFCAG00000011721,ENSFCAG00000011280,ENSFCAG00000004245,ENSFCAG00000028065,ENSFCAG00000033067,…
GO:CC	plasma membrane part	GO:0044459	0.0138789	1.85765	1725	828	128	14804	ENSFCAG00000009259,ENSFCAG00000001913,ENSFCAG00000023845,ENSFCAG00000000939,ENSFCAG00000015677,ENSFCAG00000014334,ENSFCAG00000025759,ENSFCAG00000028685,ENSFCAG00000022120,ENSFCAG00000045902,ENSFCAG00000031392,ENSFCAG00000037651,ENSFCAG00000027689,ENSFCAG00000004031,ENSFCAG00000025535,ENSFCAG00000000178,ENSFCAG00000005059,ENSFCAG00000030303,ENSFCAG00000013500,ENSFCAG00000015492,ENSFCAG00000000080,…
GO:CC	plasma membrane bounded cell projection	GO:0120025	0.0213599	1.6704	1244	828	96	14804	ENSFCAG00000012982,ENSFCAG00000000939,ENSFCAG00000025759,ENSFCAG00000013803,ENSFCAG00000031392,ENSFCAG00000004429,ENSFCAG00000001556,ENSFCAG00000004831,ENSFCAG00000014533,ENSFCAG00000011941,ENSFCAG00000029645,ENSFCAG00000031909,ENSFCAG00000025535,ENSFCAG00000000178,ENSFCAG00000043362,ENSFCAG00000011461,ENSFCAG00000005059,ENSFCAG00000036846,ENSFCAG00000027698,ENSFCAG00000045383,ENSFCAG00000010133,…
GO:CC	cell projection	GO:0042995	0.0243868	1.61284	1266	828	97	14804	ENSFCAG00000012982,ENSFCAG00000000939,ENSFCAG00000025759,ENSFCAG00000013803,ENSFCAG00000031392,ENSFCAG00000004429,ENSFCAG00000001556,ENSFCAG00000004831,ENSFCAG00000014533,ENSFCAG00000011941,ENSFCAG00000029645,ENSFCAG00000031909,ENSFCAG00000025535,ENSFCAG00000000178,ENSFCAG00000043362,ENSFCAG00000011461,ENSFCAG00000005059,ENSFCAG00000036846,ENSFCAG00000030303,ENSFCAG00000027698,ENSFCAG00000045383,…
GO:CC	nucleus	GO:0005634	0.026124	1.58296	5055	828	325	14804	ENSFCAG00000042641,ENSFCAG00000001913,ENSFCAG00000002309,ENSFCAG00000005913,ENSFCAG00000012005,ENSFCAG00000006543,ENSFCAG00000011721,ENSFCAG00000001556,ENSFCAG00000013062,ENSFCAG00000024950,ENSFCAG00000032975,ENSFCAG00000001954,ENSFCAG00000011941,ENSFCAG00000029636,ENSFCAG00000003304,ENSFCAG00000004503,ENSFCAG00000013070,ENSFCAG00000011461,ENSFCAG00000001748,ENSFCAG00000042883,ENSFCAG00000004893,…
GO:CC	cell junction	GO:0030054	0.0325986	1.4868	544	828	48	14804	ENSFCAG00000012982,ENSFCAG00000032144,ENSFCAG00000015289,ENSFCAG00000045902,ENSFCAG00000031392,ENSFCAG00000001556,ENSFCAG00000032975,ENSFCAG00000005059,ENSFCAG00000030303,ENSFCAG00000011147,ENSFCAG00000027698,ENSFCAG00000045383,ENSFCAG00000010133,ENSFCAG00000014103,ENSFCAG00000001932,ENSFCAG00000001930,ENSFCAG00000001933,ENSFCAG00000013129,ENSFCAG00000027515,ENSFCAG00000001895,ENSFCAG00000001294,…
GO:CC	protein kinase complex	GO:1902911	0.0351447	1.45414	89	828	13	14804	ENSFCAG00000023845,ENSFCAG00000013637,ENSFCAG00000046690,ENSFCAG00000001624,ENSFCAG00000026008,ENSFCAG00000004828,ENSFCAG00000029610,ENSFCAG00000005138,ENSFCAG00000009897,ENSFCAG00000013696,ENSFCAG00000003030,ENSFCAG00000009806,ENSFCAG00000038678
GO:CC	protein-containing complex	GO:0032991	0.0373718	1.42746	4363	828	283	14804	ENSFCAG00000012982,ENSFCAG00000032144,ENSFCAG00000045749,ENSFCAG00000023845,ENSFCAG00000001749,ENSFCAG00000012005,ENSFCAG00000008668,ENSFCAG00000022205,ENSFCAG00000012828,ENSFCAG00000004245,ENSFCAG00000028065,ENSFCAG00000033067,ENSFCAG00000004429,ENSFCAG00000001556,ENSFCAG00000014533,ENSFCAG00000001954,ENSFCAG00000029636,ENSFCAG00000013637,ENSFCAG00000029645,ENSFCAG00000031909,ENSFCAG00000025535,…
GO:CC	cytoskeleton	GO:0005856	0.0411244	1.3859	1436	828	106	14804	ENSFCAG00000002372,ENSFCAG00000001913,ENSFCAG00000032144,ENSFCAG00000045749,ENSFCAG00000000939,ENSFCAG00000015677,ENSFCAG00000015289,ENSFCAG00000013803,ENSFCAG00000001556,ENSFCAG00000013062,ENSFCAG00000004831,ENSFCAG00000002122,ENSFCAG00000012553,ENSFCAG00000029645,ENSFCAG00000031909,ENSFCAG00000043362,ENSFCAG00000011461,ENSFCAG00000015453,ENSFCAG00000036846,ENSFCAG00000011581,ENSFCAG00000027103,…
GO:CC	intracellular membrane-bounded organelle	GO:0043231	0.0411244	1.3859	7483	828	460	14804	ENSFCAG00000042641,ENSFCAG00000009259,ENSFCAG00000001913,ENSFCAG00000002309,ENSFCAG00000006839,ENSFCAG00000005913,ENSFCAG00000012005,ENSFCAG00000006543,ENSFCAG00000008668,ENSFCAG00000011721,ENSFCAG00000004245,ENSFCAG00000028065,ENSFCAG00000033067,ENSFCAG00000043283,ENSFCAG00000001556,ENSFCAG00000013062,ENSFCAG00000024536,ENSFCAG00000014533,ENSFCAG00000024950,ENSFCAG00000032975,ENSFCAG00000001954,…
GO:CC	organelle membrane contact site	GO:0044232	0.0453292	1.34362	17	828	5	14804	ENSFCAG00000029645,ENSFCAG00000031909,ENSFCAG00000018713,ENSFCAG00000009899,ENSFCAG00000014703
gProfiler: fcatus-miR-361
source	term_name	term_id	adjusted_p_value	negative_log10_of_adjusted_p_value	term_size	query_size	intersection_size	effective_domain_size	intersections
GO:MF	protein binding	GO:0005515	3.87553e-07	6.41167	5273	736	373	13297	ENSFCAG00000002372,ENSFCAG00000006130,ENSFCAG00000018571,ENSFCAG00000003622,ENSFCAG00000000939,ENSFCAG00000025040,ENSFCAG00000028685,ENSFCAG00000001632,ENSFCAG00000045902,ENSFCAG00000006839,ENSFCAG00000012005,ENSFCAG00000012454,ENSFCAG00000015215,ENSFCAG00000028065,ENSFCAG00000004429,ENSFCAG00000026277,ENSFCAG00000001445,ENSFCAG00000008402,ENSFCAG00000013482,ENSFCAG00000002868,ENSFCAG00000014533,…
GO:MF	enzyme binding	GO:0019899	0.0036365	2.43932	1637	736	131	13297	ENSFCAG00000000939,ENSFCAG00000028685,ENSFCAG00000012005,ENSFCAG00000012454,ENSFCAG00000028065,ENSFCAG00000004429,ENSFCAG00000001445,ENSFCAG00000008402,ENSFCAG00000013482,ENSFCAG00000002868,ENSFCAG00000014533,ENSFCAG00000011941,ENSFCAG00000026735,ENSFCAG00000045314,ENSFCAG00000013637,ENSFCAG00000009332,ENSFCAG00000034121,ENSFCAG00000004503,ENSFCAG00000001624,ENSFCAG00000019152,ENSFCAG00000003876,…
GO:MF	ligand-activated transcription factor activity	GO:0098531	0.0117483	1.93002	39	736	10	13297	ENSFCAG00000014996,ENSFCAG00000002528,ENSFCAG00000006092,ENSFCAG00000029941,ENSFCAG00000000268,ENSFCAG00000025234,ENSFCAG00000002431,ENSFCAG00000001983,ENSFCAG00000014994,ENSFCAG00000022754
GO:MF	nuclear receptor activity	GO:0004879	0.0117483	1.93002	39	736	10	13297	ENSFCAG00000014996,ENSFCAG00000002528,ENSFCAG00000006092,ENSFCAG00000029941,ENSFCAG00000000268,ENSFCAG00000025234,ENSFCAG00000002431,ENSFCAG00000001983,ENSFCAG00000014994,ENSFCAG00000022754
GO:MF	histone acetyltransferase activity	GO:0004402	0.0236685	1.62583	45	736	10	13297	ENSFCAG00000025121,ENSFCAG00000002475,ENSFCAG00000006713,ENSFCAG00000000038,ENSFCAG00000002640,ENSFCAG00000015033,ENSFCAG00000014195,ENSFCAG00000007661,ENSFCAG00000003536,ENSFCAG00000005712
GO:MF	low voltage-gated calcium channel activity	GO:0008332	0.0236685	1.62583	3	736	3	13297	ENSFCAG00000012339,ENSFCAG00000018843,ENSFCAG00000013500
GO:MF	N-acyltransferase activity	GO:0016410	0.0236685	1.62583	81	736	14	13297	ENSFCAG00000009657,ENSFCAG00000007543,ENSFCAG00000025121,ENSFCAG00000014169,ENSFCAG00000002475,ENSFCAG00000006713,ENSFCAG00000000038,ENSFCAG00000002640,ENSFCAG00000044588,ENSFCAG00000015033,ENSFCAG00000014195,ENSFCAG00000007661,ENSFCAG00000003536,ENSFCAG00000005712
GO:MF	sequence-specific DNA binding	GO:0043565	0.0236685	1.62583	936	736	78	13297	ENSFCAG00000030869,ENSFCAG00000004831,ENSFCAG00000027384,ENSFCAG00000024950,ENSFCAG00000045314,ENSFCAG00000045847,ENSFCAG00000009268,ENSFCAG00000014453,ENSFCAG00000023460,ENSFCAG00000040303,ENSFCAG00000009909,ENSFCAG00000028305,ENSFCAG00000030557,ENSFCAG00000005772,ENSFCAG00000026568,ENSFCAG00000011519,ENSFCAG00000006154,ENSFCAG00000015036,ENSFCAG00000014327,ENSFCAG00000046390,ENSFCAG00000011229,…
GO:MF	transcription regulator activity	GO:0140110	0.0236685	1.62583	1027	736	85	13297	ENSFCAG00000030869,ENSFCAG00000004831,ENSFCAG00000027384,ENSFCAG00000024950,ENSFCAG00000045314,ENSFCAG00000002265,ENSFCAG00000027028,ENSFCAG00000009268,ENSFCAG00000014453,ENSFCAG00000023460,ENSFCAG00000040303,ENSFCAG00000009909,ENSFCAG00000001480,ENSFCAG00000028305,ENSFCAG00000030557,ENSFCAG00000005772,ENSFCAG00000026568,ENSFCAG00000011519,ENSFCAG00000006154,ENSFCAG00000015036,ENSFCAG00000046390,…
GO:MF	transcription factor binding	GO:0008134	0.0243853	1.61287	496	736	47	13297	ENSFCAG00000024950,ENSFCAG00000011941,ENSFCAG00000003572,ENSFCAG00000002265,ENSFCAG00000031864,ENSFCAG00000027028,ENSFCAG00000009268,ENSFCAG00000014453,ENSFCAG00000040439,ENSFCAG00000000145,ENSFCAG00000028305,ENSFCAG00000006154,ENSFCAG00000015036,ENSFCAG00000046390,ENSFCAG00000002156,ENSFCAG00000029852,ENSFCAG00000002133,ENSFCAG00000000038,ENSFCAG00000025302,ENSFCAG00000024020,ENSFCAG00000015435,…
GO:MF	peptide-lysine-N-acetyltransferase activity	GO:0061733	0.0243853	1.61287	47	736	10	13297	ENSFCAG00000025121,ENSFCAG00000002475,ENSFCAG00000006713,ENSFCAG00000000038,ENSFCAG00000002640,ENSFCAG00000015033,ENSFCAG00000014195,ENSFCAG00000007661,ENSFCAG00000003536,ENSFCAG00000005712
GO:MF	H4 histone acetyltransferase activity	GO:0010485	0.0431317	1.3652	19	736	6	13297	ENSFCAG00000002475,ENSFCAG00000006713,ENSFCAG00000000038,ENSFCAG00000002640,ENSFCAG00000003536,ENSFCAG00000005712
GO:MF	nuclear receptor transcription coactivator activity	GO:0030374	0.0445688	1.35097	52	736	10	13297	ENSFCAG00000015033,ENSFCAG00000014996,ENSFCAG00000002528,ENSFCAG00000006092,ENSFCAG00000025234,ENSFCAG00000000043,ENSFCAG00000014195,ENSFCAG00000014994,ENSFCAG00000022754,ENSFCAG00000003536
GO:MF	transferase activity, transferring acyl groups	GO:0016746	0.0445688	1.35097	211	736	24	13297	ENSFCAG00000009657,ENSFCAG00000007543,ENSFCAG00000002065,ENSFCAG00000012019,ENSFCAG00000007725,ENSFCAG00000025121,ENSFCAG00000014169,ENSFCAG00000005296,ENSFCAG00000002475,ENSFCAG00000006713,ENSFCAG00000000038,ENSFCAG00000002640,ENSFCAG00000032094,ENSFCAG00000012127,ENSFCAG00000044588,ENSFCAG00000034371,ENSFCAG00000015033,ENSFCAG00000014195,ENSFCAG00000007661,ENSFCAG00000023652,ENSFCAG00000003536,…
GO:MF	acetyltransferase activity	GO:0016407	0.0445688	1.35097	83	736	13	13297	ENSFCAG00000002065,ENSFCAG00000025121,ENSFCAG00000005296,ENSFCAG00000002475,ENSFCAG00000006713,ENSFCAG00000000038,ENSFCAG00000002640,ENSFCAG00000044588,ENSFCAG00000015033,ENSFCAG00000014195,ENSFCAG00000007661,ENSFCAG00000003536,ENSFCAG00000005712
GO:MF	binding	GO:0005488	0.0445688	1.35097	9644	736	572	13297	ENSFCAG00000002372,ENSFCAG00000007691,ENSFCAG00000006130,ENSFCAG00000007784,ENSFCAG00000018571,ENSFCAG00000003622,ENSFCAG00000003983,ENSFCAG00000012459,ENSFCAG00000000939,ENSFCAG00000029424,ENSFCAG00000025040,ENSFCAG00000028685,ENSFCAG00000022120,ENSFCAG00000001632,ENSFCAG00000045902,ENSFCAG00000006839,ENSFCAG00000012005,ENSFCAG00000013124,ENSFCAG00000010710,ENSFCAG00000012454,ENSFCAG00000015215,…
GO:MF	peptide N-acetyltransferase activity	GO:0034212	0.0445688	1.35097	53	736	10	13297	ENSFCAG00000025121,ENSFCAG00000002475,ENSFCAG00000006713,ENSFCAG00000000038,ENSFCAG00000002640,ENSFCAG00000015033,ENSFCAG00000014195,ENSFCAG00000007661,ENSFCAG00000003536,ENSFCAG00000005712
GO:MF	transferase activity, transferring acyl groups other than amino-acyl groups	GO:0016747	0.0445688	1.35097	186	736	22	13297	ENSFCAG00000009657,ENSFCAG00000007543,ENSFCAG00000002065,ENSFCAG00000007725,ENSFCAG00000025121,ENSFCAG00000014169,ENSFCAG00000005296,ENSFCAG00000002475,ENSFCAG00000006713,ENSFCAG00000000038,ENSFCAG00000002640,ENSFCAG00000012127,ENSFCAG00000044588,ENSFCAG00000034371,ENSFCAG00000015033,ENSFCAG00000014195,ENSFCAG00000007661,ENSFCAG00000023652,ENSFCAG00000003536,ENSFCAG00000005712,ENSFCAG00000006635,…
GO:BP	developmental process	GO:0032502	5.98524e-07	6.22292	4047	802	309	14276	ENSFCAG00000036378,ENSFCAG00000012459,ENSFCAG00000015536,ENSFCAG00000015677,ENSFCAG00000034815,ENSFCAG00000025040,ENSFCAG00000022120,ENSFCAG00000010091,ENSFCAG00000045902,ENSFCAG00000015215,ENSFCAG00000028065,ENSFCAG00000033810,ENSFCAG00000043283,ENSFCAG00000044777,ENSFCAG00000004831,ENSFCAG00000008402,ENSFCAG00000014533,ENSFCAG00000045314,ENSFCAG00000001581,ENSFCAG00000004503,ENSFCAG00000011461,…
GO:BP	multicellular organism development	GO:0007275	3.47648e-06	5.45886	3411	802	264	14276	ENSFCAG00000036378,ENSFCAG00000012459,ENSFCAG00000015536,ENSFCAG00000015677,ENSFCAG00000025040,ENSFCAG00000022120,ENSFCAG00000045902,ENSFCAG00000015215,ENSFCAG00000033810,ENSFCAG00000043283,ENSFCAG00000044777,ENSFCAG00000004831,ENSFCAG00000008402,ENSFCAG00000014533,ENSFCAG00000045314,ENSFCAG00000001581,ENSFCAG00000004503,ENSFCAG00000011461,ENSFCAG00000012979,ENSFCAG00000041275,ENSFCAG00000008561,…
GO:BP	anatomical structure development	GO:0048856	3.47648e-06	5.45886	3817	802	289	14276	ENSFCAG00000036378,ENSFCAG00000012459,ENSFCAG00000015536,ENSFCAG00000015677,ENSFCAG00000025040,ENSFCAG00000022120,ENSFCAG00000010091,ENSFCAG00000045902,ENSFCAG00000015215,ENSFCAG00000033810,ENSFCAG00000043283,ENSFCAG00000044777,ENSFCAG00000004831,ENSFCAG00000008402,ENSFCAG00000014533,ENSFCAG00000045314,ENSFCAG00000001581,ENSFCAG00000004503,ENSFCAG00000011461,ENSFCAG00000012979,ENSFCAG00000022198,…
GO:BP	system development	GO:0048731	8.67302e-06	5.06183	3182	802	247	14276	ENSFCAG00000036378,ENSFCAG00000012459,ENSFCAG00000015536,ENSFCAG00000015677,ENSFCAG00000025040,ENSFCAG00000022120,ENSFCAG00000045902,ENSFCAG00000015215,ENSFCAG00000033810,ENSFCAG00000004831,ENSFCAG00000008402,ENSFCAG00000014533,ENSFCAG00000045314,ENSFCAG00000001581,ENSFCAG00000004503,ENSFCAG00000011461,ENSFCAG00000012979,ENSFCAG00000041275,ENSFCAG00000008561,ENSFCAG00000028536,ENSFCAG00000010627,…
GO:BP	regulation of metabolic process	GO:0019222	2.67656e-05	4.57242	4656	802	334	14276	ENSFCAG00000042227,ENSFCAG00000003622,ENSFCAG00000025040,ENSFCAG00000022120,ENSFCAG00000004429,ENSFCAG00000043283,ENSFCAG00000030869,ENSFCAG00000009497,ENSFCAG00000004831,ENSFCAG00000027384,ENSFCAG00000024950,ENSFCAG00000011941,ENSFCAG00000045314,ENSFCAG00000013637,ENSFCAG00000009332,ENSFCAG00000003304,ENSFCAG00000004503,ENSFCAG00000013070,ENSFCAG00000022198,ENSFCAG00000008561,ENSFCAG00000011147,…
GO:BP	regulation of response to stimulus	GO:0048583	5.15826e-05	4.2875	2768	802	216	14276	ENSFCAG00000036378,ENSFCAG00000000939,ENSFCAG00000029424,ENSFCAG00000015536,ENSFCAG00000028685,ENSFCAG00000022120,ENSFCAG00000015289,ENSFCAG00000045902,ENSFCAG00000006839,ENSFCAG00000012005,ENSFCAG00000028065,ENSFCAG00000001445,ENSFCAG00000004831,ENSFCAG00000008402,ENSFCAG00000013482,ENSFCAG00000002868,ENSFCAG00000014533,ENSFCAG00000011941,ENSFCAG00000026735,ENSFCAG00000003304,ENSFCAG00000004503,…
GO:BP	regulation of signaling	GO:0023051	5.15826e-05	4.2875	2411	802	193	14276	ENSFCAG00000036378,ENSFCAG00000000939,ENSFCAG00000015536,ENSFCAG00000028685,ENSFCAG00000022120,ENSFCAG00000015289,ENSFCAG00000006839,ENSFCAG00000012005,ENSFCAG00000001445,ENSFCAG00000004831,ENSFCAG00000008402,ENSFCAG00000013482,ENSFCAG00000002868,ENSFCAG00000014533,ENSFCAG00000011941,ENSFCAG00000026735,ENSFCAG00000011461,ENSFCAG00000000621,ENSFCAG00000038541,ENSFCAG00000008561,ENSFCAG00000011930,…
GO:BP	cellular developmental process	GO:0048869	6.71976e-05	4.17265	2819	802	218	14276	ENSFCAG00000036378,ENSFCAG00000015536,ENSFCAG00000034815,ENSFCAG00000022120,ENSFCAG00000010091,ENSFCAG00000045902,ENSFCAG00000028065,ENSFCAG00000033810,ENSFCAG00000004831,ENSFCAG00000008402,ENSFCAG00000014533,ENSFCAG00000045314,ENSFCAG00000001581,ENSFCAG00000011461,ENSFCAG00000022198,ENSFCAG00000041275,ENSFCAG00000008561,ENSFCAG00000028536,ENSFCAG00000019136,ENSFCAG00000033714,ENSFCAG00000034944,…
GO:BP	regulation of cell communication	GO:0010646	6.71976e-05	4.17265	2395	802	191	14276	ENSFCAG00000036378,ENSFCAG00000000939,ENSFCAG00000015536,ENSFCAG00000028685,ENSFCAG00000022120,ENSFCAG00000015289,ENSFCAG00000006839,ENSFCAG00000012005,ENSFCAG00000001445,ENSFCAG00000004831,ENSFCAG00000008402,ENSFCAG00000013482,ENSFCAG00000002868,ENSFCAG00000014533,ENSFCAG00000011941,ENSFCAG00000026735,ENSFCAG00000011461,ENSFCAG00000000621,ENSFCAG00000038541,ENSFCAG00000008561,ENSFCAG00000011930,…
GO:BP	regulation of macromolecule metabolic process	GO:0060255	9.18729e-05	4.03681	4332	802	310	14276	ENSFCAG00000042227,ENSFCAG00000003622,ENSFCAG00000022120,ENSFCAG00000004429,ENSFCAG00000043283,ENSFCAG00000030869,ENSFCAG00000009497,ENSFCAG00000004831,ENSFCAG00000027384,ENSFCAG00000024950,ENSFCAG00000011941,ENSFCAG00000045314,ENSFCAG00000013637,ENSFCAG00000009332,ENSFCAG00000003304,ENSFCAG00000004503,ENSFCAG00000013070,ENSFCAG00000022198,ENSFCAG00000008561,ENSFCAG00000011147,ENSFCAG00000045850,…
GO:BP	regulation of signal transduction	GO:0009966	0.000141695	3.84865	2180	802	175	14276	ENSFCAG00000036378,ENSFCAG00000015536,ENSFCAG00000028685,ENSFCAG00000022120,ENSFCAG00000015289,ENSFCAG00000006839,ENSFCAG00000012005,ENSFCAG00000001445,ENSFCAG00000004831,ENSFCAG00000008402,ENSFCAG00000013482,ENSFCAG00000002868,ENSFCAG00000014533,ENSFCAG00000011941,ENSFCAG00000026735,ENSFCAG00000000621,ENSFCAG00000038541,ENSFCAG00000008561,ENSFCAG00000011930,ENSFCAG00000028536,ENSFCAG00000033714,…
GO:BP	negative regulation of cellular process	GO:0048523	0.000184164	3.7348	3350	802	248	14276	ENSFCAG00000036378,ENSFCAG00000015536,ENSFCAG00000028685,ENSFCAG00000045902,ENSFCAG00000015215,ENSFCAG00000004429,ENSFCAG00000009497,ENSFCAG00000004831,ENSFCAG00000008402,ENSFCAG00000024950,ENSFCAG00000011941,ENSFCAG00000026735,ENSFCAG00000045314,ENSFCAG00000003304,ENSFCAG00000004503,ENSFCAG00000013070,ENSFCAG00000000621,ENSFCAG00000011147,ENSFCAG00000011930,ENSFCAG00000028536,ENSFCAG00000045850,…
GO:BP	response to organic substance	GO:0010033	0.000184164	3.7348	1856	802	153	14276	ENSFCAG00000036378,ENSFCAG00000000939,ENSFCAG00000029424,ENSFCAG00000015536,ENSFCAG00000025040,ENSFCAG00000028685,ENSFCAG00000037651,ENSFCAG00000011941,ENSFCAG00000004503,ENSFCAG00000018843,ENSFCAG00000011147,ENSFCAG00000011930,ENSFCAG00000033714,ENSFCAG00000006941,ENSFCAG00000034944,ENSFCAG00000045383,ENSFCAG00000030656,ENSFCAG00000021968,ENSFCAG00000034905,ENSFCAG00000027805,ENSFCAG00000032380,…
GO:BP	negative regulation of biological process	GO:0048519	0.000288849	3.53933	3714	802	269	14276	ENSFCAG00000036378,ENSFCAG00000029424,ENSFCAG00000015536,ENSFCAG00000015677,ENSFCAG00000028685,ENSFCAG00000045902,ENSFCAG00000015215,ENSFCAG00000004429,ENSFCAG00000030869,ENSFCAG00000009497,ENSFCAG00000004831,ENSFCAG00000008402,ENSFCAG00000024950,ENSFCAG00000011941,ENSFCAG00000026735,ENSFCAG00000045314,ENSFCAG00000003304,ENSFCAG00000004503,ENSFCAG00000013070,ENSFCAG00000000621,ENSFCAG00000011147,…
GO:BP	positive regulation of biological process	GO:0048518	0.000335779	3.47395	4388	802	309	14276	ENSFCAG00000003622,ENSFCAG00000015536,ENSFCAG00000015677,ENSFCAG00000034815,ENSFCAG00000025040,ENSFCAG00000028685,ENSFCAG00000022120,ENSFCAG00000012454,ENSFCAG00000028065,ENSFCAG00000033810,ENSFCAG00000030869,ENSFCAG00000001445,ENSFCAG00000004831,ENSFCAG00000013482,ENSFCAG00000014533,ENSFCAG00000027384,ENSFCAG00000015066,ENSFCAG00000002370,ENSFCAG00000011941,ENSFCAG00000045314,ENSFCAG00000013637,…
GO:BP	cell differentiation	GO:0030154	0.000370687	3.43099	2663	802	203	14276	ENSFCAG00000036378,ENSFCAG00000015536,ENSFCAG00000034815,ENSFCAG00000022120,ENSFCAG00000010091,ENSFCAG00000045902,ENSFCAG00000028065,ENSFCAG00000033810,ENSFCAG00000004831,ENSFCAG00000008402,ENSFCAG00000014533,ENSFCAG00000045314,ENSFCAG00000001581,ENSFCAG00000011461,ENSFCAG00000041275,ENSFCAG00000008561,ENSFCAG00000028536,ENSFCAG00000019136,ENSFCAG00000033714,ENSFCAG00000019152,ENSFCAG00000002535,…
GO:BP	positive regulation of cellular process	GO:0048522	0.00051937	3.28452	3846	802	275	14276	ENSFCAG00000003622,ENSFCAG00000015536,ENSFCAG00000015677,ENSFCAG00000034815,ENSFCAG00000028685,ENSFCAG00000022120,ENSFCAG00000012454,ENSFCAG00000028065,ENSFCAG00000033810,ENSFCAG00000030869,ENSFCAG00000004831,ENSFCAG00000014533,ENSFCAG00000027384,ENSFCAG00000015066,ENSFCAG00000002370,ENSFCAG00000011941,ENSFCAG00000045314,ENSFCAG00000013637,ENSFCAG00000001581,ENSFCAG00000003304,ENSFCAG00000004503,…
GO:BP	regulation of nitrogen compound metabolic process	GO:0051171	0.000625403	3.20384	4144	802	292	14276	ENSFCAG00000042227,ENSFCAG00000003622,ENSFCAG00000022120,ENSFCAG00000004429,ENSFCAG00000030869,ENSFCAG00000009497,ENSFCAG00000004831,ENSFCAG00000027384,ENSFCAG00000024950,ENSFCAG00000011941,ENSFCAG00000045314,ENSFCAG00000013637,ENSFCAG00000003304,ENSFCAG00000004503,ENSFCAG00000013070,ENSFCAG00000022198,ENSFCAG00000008561,ENSFCAG00000011147,ENSFCAG00000045850,ENSFCAG00000001588,ENSFCAG00000001624,…
GO:BP	animal organ development	GO:0048513	0.000625403	3.20384	2342	802	181	14276	ENSFCAG00000036378,ENSFCAG00000012459,ENSFCAG00000045902,ENSFCAG00000033810,ENSFCAG00000004831,ENSFCAG00000014533,ENSFCAG00000045314,ENSFCAG00000001581,ENSFCAG00000004503,ENSFCAG00000012979,ENSFCAG00000008561,ENSFCAG00000028536,ENSFCAG00000010627,ENSFCAG00000033714,ENSFCAG00000007543,ENSFCAG00000011301,ENSFCAG00000044690,ENSFCAG00000027805,ENSFCAG00000006714,ENSFCAG00000042990,ENSFCAG00000009754,…
GO:BP	anatomical structure morphogenesis	GO:0009653	0.000625403	3.20384	1922	802	154	14276	ENSFCAG00000036378,ENSFCAG00000015536,ENSFCAG00000015677,ENSFCAG00000025040,ENSFCAG00000010091,ENSFCAG00000045902,ENSFCAG00000015215,ENSFCAG00000044777,ENSFCAG00000004831,ENSFCAG00000008402,ENSFCAG00000001581,ENSFCAG00000011461,ENSFCAG00000022198,ENSFCAG00000028536,ENSFCAG00000010627,ENSFCAG00000034944,ENSFCAG00000011301,ENSFCAG00000006714,ENSFCAG00000042990,ENSFCAG00000009754,ENSFCAG00000016365,…
GO:BP	regulation of cellular metabolic process	GO:0031323	0.00063605	3.19651	4348	802	304	14276	ENSFCAG00000003622,ENSFCAG00000022120,ENSFCAG00000004429,ENSFCAG00000030869,ENSFCAG00000009497,ENSFCAG00000004831,ENSFCAG00000027384,ENSFCAG00000024950,ENSFCAG00000011941,ENSFCAG00000045314,ENSFCAG00000013637,ENSFCAG00000003304,ENSFCAG00000004503,ENSFCAG00000013070,ENSFCAG00000022198,ENSFCAG00000008561,ENSFCAG00000011147,ENSFCAG00000045850,ENSFCAG00000001588,ENSFCAG00000001624,ENSFCAG00000033714,…
GO:BP	regulation of primary metabolic process	GO:0080090	0.000713992	3.14631	4238	802	297	14276	ENSFCAG00000042227,ENSFCAG00000003622,ENSFCAG00000022120,ENSFCAG00000004429,ENSFCAG00000030869,ENSFCAG00000009497,ENSFCAG00000004831,ENSFCAG00000027384,ENSFCAG00000024950,ENSFCAG00000011941,ENSFCAG00000045314,ENSFCAG00000013637,ENSFCAG00000003304,ENSFCAG00000004503,ENSFCAG00000013070,ENSFCAG00000022198,ENSFCAG00000008561,ENSFCAG00000011147,ENSFCAG00000045850,ENSFCAG00000001588,ENSFCAG00000001624,…
GO:BP	cellular response to organic substance	GO:0071310	0.000814372	3.08918	1560	802	129	14276	ENSFCAG00000036378,ENSFCAG00000000939,ENSFCAG00000029424,ENSFCAG00000015536,ENSFCAG00000025040,ENSFCAG00000037651,ENSFCAG00000011941,ENSFCAG00000004503,ENSFCAG00000018843,ENSFCAG00000011147,ENSFCAG00000011930,ENSFCAG00000033714,ENSFCAG00000045383,ENSFCAG00000030656,ENSFCAG00000021968,ENSFCAG00000034905,ENSFCAG00000027805,ENSFCAG00000032380,ENSFCAG00000025665,ENSFCAG00000036750,ENSFCAG00000045824,…
GO:BP	positive regulation of cellular metabolic process	GO:0031325	0.000814372	3.08918	2470	802	188	14276	ENSFCAG00000003622,ENSFCAG00000022120,ENSFCAG00000030869,ENSFCAG00000027384,ENSFCAG00000011941,ENSFCAG00000045314,ENSFCAG00000013637,ENSFCAG00000003304,ENSFCAG00000004503,ENSFCAG00000008561,ENSFCAG00000011147,ENSFCAG00000033714,ENSFCAG00000013709,ENSFCAG00000006941,ENSFCAG00000019152,ENSFCAG00000045383,ENSFCAG00000003572,ENSFCAG00000002507,ENSFCAG00000034905,ENSFCAG00000006714,ENSFCAG00000032380,…
GO:BP	positive regulation of metabolic process	GO:0009893	0.000838116	3.0767	2663	802	200	14276	ENSFCAG00000003622,ENSFCAG00000025040,ENSFCAG00000022120,ENSFCAG00000030869,ENSFCAG00000027384,ENSFCAG00000011941,ENSFCAG00000045314,ENSFCAG00000013637,ENSFCAG00000003304,ENSFCAG00000004503,ENSFCAG00000008561,ENSFCAG00000011147,ENSFCAG00000033714,ENSFCAG00000013709,ENSFCAG00000006941,ENSFCAG00000019152,ENSFCAG00000045383,ENSFCAG00000003572,ENSFCAG00000002507,ENSFCAG00000044690,ENSFCAG00000034905,…
GO:BP	positive regulation of nitrogen compound metabolic process	GO:0051173	0.00117256	2.93086	2392	802	182	14276	ENSFCAG00000003622,ENSFCAG00000022120,ENSFCAG00000030869,ENSFCAG00000027384,ENSFCAG00000011941,ENSFCAG00000045314,ENSFCAG00000013637,ENSFCAG00000003304,ENSFCAG00000004503,ENSFCAG00000008561,ENSFCAG00000011147,ENSFCAG00000033714,ENSFCAG00000013709,ENSFCAG00000006941,ENSFCAG00000019152,ENSFCAG00000045383,ENSFCAG00000003572,ENSFCAG00000002507,ENSFCAG00000034905,ENSFCAG00000006714,ENSFCAG00000032380,…
GO:BP	positive regulation of macromolecule metabolic process	GO:0010604	0.00243411	2.61366	2501	802	187	14276	ENSFCAG00000003622,ENSFCAG00000022120,ENSFCAG00000030869,ENSFCAG00000027384,ENSFCAG00000011941,ENSFCAG00000045314,ENSFCAG00000013637,ENSFCAG00000003304,ENSFCAG00000004503,ENSFCAG00000008561,ENSFCAG00000011147,ENSFCAG00000033714,ENSFCAG00000013709,ENSFCAG00000006941,ENSFCAG00000019152,ENSFCAG00000045383,ENSFCAG00000003572,ENSFCAG00000002507,ENSFCAG00000044690,ENSFCAG00000034905,ENSFCAG00000006714,…
GO:BP	regulation of biological process	GO:0050789	0.00269569	2.56933	8695	802	545	14276	ENSFCAG00000042227,ENSFCAG00000018571,ENSFCAG00000003622,ENSFCAG00000036378,ENSFCAG00000000939,ENSFCAG00000029424,ENSFCAG00000015536,ENSFCAG00000015677,ENSFCAG00000014334,ENSFCAG00000002685,ENSFCAG00000034815,ENSFCAG00000025040,ENSFCAG00000028685,ENSFCAG00000022120,ENSFCAG00000015289,ENSFCAG00000045902,ENSFCAG00000006839,ENSFCAG00000012005,ENSFCAG00000012454,ENSFCAG00000015215,ENSFCAG00000028065,…
GO:BP	biological regulation	GO:0065007	0.00302678	2.51902	9281	802	576	14276	ENSFCAG00000042227,ENSFCAG00000018571,ENSFCAG00000003622,ENSFCAG00000036378,ENSFCAG00000012459,ENSFCAG00000000939,ENSFCAG00000029424,ENSFCAG00000015536,ENSFCAG00000015677,ENSFCAG00000014334,ENSFCAG00000002685,ENSFCAG00000034815,ENSFCAG00000025040,ENSFCAG00000028685,ENSFCAG00000022120,ENSFCAG00000015289,ENSFCAG00000001632,ENSFCAG00000045902,ENSFCAG00000006839,ENSFCAG00000012005,ENSFCAG00000012454,…
GO:BP	cellular response to organic cyclic compound	GO:0071407	0.00311959	2.5059	326	802	38	14276	ENSFCAG00000000939,ENSFCAG00000045383,ENSFCAG00000034905,ENSFCAG00000029132,ENSFCAG00000031864,ENSFCAG00000031113,ENSFCAG00000000145,ENSFCAG00000028305,ENSFCAG00000030557,ENSFCAG00000046390,ENSFCAG00000009462,ENSFCAG00000011093,ENSFCAG00000002156,ENSFCAG00000021980,ENSFCAG00000002133,ENSFCAG00000004898,ENSFCAG00000000038,ENSFCAG00000006943,ENSFCAG00000014173,ENSFCAG00000033871,ENSFCAG00000024083,…
GO:BP	response to endogenous stimulus	GO:0009719	0.00311959	2.5059	944	802	84	14276	ENSFCAG00000036378,ENSFCAG00000025040,ENSFCAG00000018843,ENSFCAG00000011930,ENSFCAG00000006941,ENSFCAG00000034944,ENSFCAG00000045383,ENSFCAG00000030656,ENSFCAG00000021968,ENSFCAG00000034905,ENSFCAG00000032380,ENSFCAG00000036750,ENSFCAG00000045824,ENSFCAG00000029132,ENSFCAG00000031864,ENSFCAG00000006717,ENSFCAG00000007712,ENSFCAG00000031113,ENSFCAG00000040439,ENSFCAG00000019220,ENSFCAG00000045399,…
GO:BP	regulation of cellular process	GO:0050794	0.00324815	2.48836	8179	802	516	14276	ENSFCAG00000018571,ENSFCAG00000003622,ENSFCAG00000036378,ENSFCAG00000000939,ENSFCAG00000029424,ENSFCAG00000015536,ENSFCAG00000015677,ENSFCAG00000014334,ENSFCAG00000002685,ENSFCAG00000034815,ENSFCAG00000025040,ENSFCAG00000028685,ENSFCAG00000022120,ENSFCAG00000015289,ENSFCAG00000045902,ENSFCAG00000006839,ENSFCAG00000012005,ENSFCAG00000012454,ENSFCAG00000015215,ENSFCAG00000028065,ENSFCAG00000004429,…
GO:BP	animal organ morphogenesis	GO:0009887	0.00403135	2.39455	769	802	71	14276	ENSFCAG00000045902,ENSFCAG00000001581,ENSFCAG00000011301,ENSFCAG00000042990,ENSFCAG00000009754,ENSFCAG00000045824,ENSFCAG00000026867,ENSFCAG00000010530,ENSFCAG00000044465,ENSFCAG00000007627,ENSFCAG00000009268,ENSFCAG00000008246,ENSFCAG00000004375,ENSFCAG00000013612,ENSFCAG00000028305,ENSFCAG00000030557,ENSFCAG00000005772,ENSFCAG00000006154,ENSFCAG00000015036,ENSFCAG00000027442,ENSFCAG00000002726,…
GO:BP	skeletal system development	GO:0001501	0.00403135	2.39455	381	802	42	14276	ENSFCAG00000036378,ENSFCAG00000012979,ENSFCAG00000011301,ENSFCAG00000009754,ENSFCAG00000045824,ENSFCAG00000026867,ENSFCAG00000031864,ENSFCAG00000012954,ENSFCAG00000008246,ENSFCAG00000013612,ENSFCAG00000027442,ENSFCAG00000002726,ENSFCAG00000046390,ENSFCAG00000025359,ENSFCAG00000037382,ENSFCAG00000032832,ENSFCAG00000004769,ENSFCAG00000005323,ENSFCAG00000012400,ENSFCAG00000014173,ENSFCAG00000009811,…
GO:BP	localization	GO:0051179	0.00429764	2.36677	4500	802	306	14276	ENSFCAG00000007691,ENSFCAG00000006130,ENSFCAG00000007784,ENSFCAG00000018571,ENSFCAG00000036378,ENSFCAG00000000939,ENSFCAG00000015536,ENSFCAG00000003237,ENSFCAG00000028065,ENSFCAG00000004429,ENSFCAG00000033810,ENSFCAG00000026277,ENSFCAG00000043283,ENSFCAG00000023791,ENSFCAG00000037651,ENSFCAG00000001445,ENSFCAG00000044777,ENSFCAG00000004831,ENSFCAG00000008402,ENSFCAG00000013482,ENSFCAG00000014533,…
GO:BP	cellular response to endogenous stimulus	GO:0071495	0.00484753	2.31448	874	802	78	14276	ENSFCAG00000036378,ENSFCAG00000025040,ENSFCAG00000018843,ENSFCAG00000011930,ENSFCAG00000045383,ENSFCAG00000030656,ENSFCAG00000021968,ENSFCAG00000034905,ENSFCAG00000032380,ENSFCAG00000036750,ENSFCAG00000045824,ENSFCAG00000029132,ENSFCAG00000031864,ENSFCAG00000006717,ENSFCAG00000007712,ENSFCAG00000031113,ENSFCAG00000040439,ENSFCAG00000019220,ENSFCAG00000045399,ENSFCAG00000013612,ENSFCAG00000016224,…
GO:BP	cellular response to chemical stimulus	GO:0070887	0.00510178	2.29228	1943	802	149	14276	ENSFCAG00000036378,ENSFCAG00000000939,ENSFCAG00000029424,ENSFCAG00000015536,ENSFCAG00000025040,ENSFCAG00000012465,ENSFCAG00000037651,ENSFCAG00000013482,ENSFCAG00000024950,ENSFCAG00000011941,ENSFCAG00000034121,ENSFCAG00000004503,ENSFCAG00000018843,ENSFCAG00000011147,ENSFCAG00000011930,ENSFCAG00000033714,ENSFCAG00000045383,ENSFCAG00000003572,ENSFCAG00000030656,ENSFCAG00000021968,ENSFCAG00000034905,…
GO:BP	internal protein amino acid acetylation	GO:0006475	0.00536566	2.27038	129	802	20	14276	ENSFCAG00000011941,ENSFCAG00000004503,ENSFCAG00000002265,ENSFCAG00000025121,ENSFCAG00000006154,ENSFCAG00000002475,ENSFCAG00000006880,ENSFCAG00000006713,ENSFCAG00000000038,ENSFCAG00000002640,ENSFCAG00000014173,ENSFCAG00000000600,ENSFCAG00000015033,ENSFCAG00000014496,ENSFCAG00000037751,ENSFCAG00000014195,ENSFCAG00000007661,ENSFCAG00000003536,ENSFCAG00000043985,ENSFCAG00000005712
GO:BP	cell surface receptor signaling pathway	GO:0007166	0.00551699	2.2583	1870	802	144	14276	ENSFCAG00000036378,ENSFCAG00000000939,ENSFCAG00000015536,ENSFCAG00000015677,ENSFCAG00000014334,ENSFCAG00000002685,ENSFCAG00000025040,ENSFCAG00000028685,ENSFCAG00000011941,ENSFCAG00000026735,ENSFCAG00000004503,ENSFCAG00000000080,ENSFCAG00000038541,ENSFCAG00000028536,ENSFCAG00000010627,ENSFCAG00000001588,ENSFCAG00000001624,ENSFCAG00000033714,ENSFCAG00000006941,ENSFCAG00000034944,ENSFCAG00000015259,…
GO:BP	nervous system development	GO:0007399	0.00873898	2.05854	1502	802	119	14276	ENSFCAG00000015536,ENSFCAG00000015677,ENSFCAG00000022120,ENSFCAG00000004831,ENSFCAG00000008402,ENSFCAG00000045314,ENSFCAG00000001581,ENSFCAG00000004503,ENSFCAG00000011461,ENSFCAG00000041275,ENSFCAG00000028536,ENSFCAG00000010627,ENSFCAG00000034944,ENSFCAG00000045383,ENSFCAG00000002429,ENSFCAG00000006714,ENSFCAG00000013435,ENSFCAG00000002378,ENSFCAG00000039189,ENSFCAG00000006415,ENSFCAG00000010530,…
GO:BP	transcription by RNA polymerase II	GO:0006366	0.00894846	2.04825	1611	802	126	14276	ENSFCAG00000003622,ENSFCAG00000004831,ENSFCAG00000027384,ENSFCAG00000024950,ENSFCAG00000011941,ENSFCAG00000045314,ENSFCAG00000022198,ENSFCAG00000011147,ENSFCAG00000045850,ENSFCAG00000001624,ENSFCAG00000006941,ENSFCAG00000006319,ENSFCAG00000003572,ENSFCAG00000032380,ENSFCAG00000002265,ENSFCAG00000002378,ENSFCAG00000036750,ENSFCAG00000031864,ENSFCAG00000001542,ENSFCAG00000041783,ENSFCAG00000027028,…
GO:BP	cellular protein modification process	GO:0006464	0.00923386	2.03462	2901	802	207	14276	ENSFCAG00000022120,ENSFCAG00000010710,ENSFCAG00000012454,ENSFCAG00000011941,ENSFCAG00000026735,ENSFCAG00000013637,ENSFCAG00000004503,ENSFCAG00000012672,ENSFCAG00000000621,ENSFCAG00000011147,ENSFCAG00000001588,ENSFCAG00000001624,ENSFCAG00000006941,ENSFCAG00000019152,ENSFCAG00000003876,ENSFCAG00000010004,ENSFCAG00000027060,ENSFCAG00000006721,ENSFCAG00000029255,ENSFCAG00000012805,ENSFCAG00000015358,…
GO:BP	protein modification process	GO:0036211	0.00923386	2.03462	2901	802	207	14276	ENSFCAG00000022120,ENSFCAG00000010710,ENSFCAG00000012454,ENSFCAG00000011941,ENSFCAG00000026735,ENSFCAG00000013637,ENSFCAG00000004503,ENSFCAG00000012672,ENSFCAG00000000621,ENSFCAG00000011147,ENSFCAG00000001588,ENSFCAG00000001624,ENSFCAG00000006941,ENSFCAG00000019152,ENSFCAG00000003876,ENSFCAG00000010004,ENSFCAG00000027060,ENSFCAG00000006721,ENSFCAG00000029255,ENSFCAG00000012805,ENSFCAG00000015358,…
GO:BP	regulation of transcription by RNA polymerase II	GO:0006357	0.00944968	2.02458	1554	802	122	14276	ENSFCAG00000003622,ENSFCAG00000004831,ENSFCAG00000027384,ENSFCAG00000024950,ENSFCAG00000011941,ENSFCAG00000045314,ENSFCAG00000022198,ENSFCAG00000011147,ENSFCAG00000045850,ENSFCAG00000001624,ENSFCAG00000006941,ENSFCAG00000006319,ENSFCAG00000003572,ENSFCAG00000032380,ENSFCAG00000002265,ENSFCAG00000002378,ENSFCAG00000036750,ENSFCAG00000031864,ENSFCAG00000001542,ENSFCAG00000041783,ENSFCAG00000027028,…
GO:BP	internal peptidyl-lysine acetylation	GO:0018393	0.0104326	1.98161	126	802	19	14276	ENSFCAG00000011941,ENSFCAG00000004503,ENSFCAG00000002265,ENSFCAG00000025121,ENSFCAG00000006154,ENSFCAG00000002475,ENSFCAG00000006880,ENSFCAG00000006713,ENSFCAG00000000038,ENSFCAG00000002640,ENSFCAG00000014173,ENSFCAG00000015033,ENSFCAG00000014496,ENSFCAG00000037751,ENSFCAG00000014195,ENSFCAG00000007661,ENSFCAG00000003536,ENSFCAG00000043985,ENSFCAG00000005712
GO:BP	regulation of gene expression	GO:0010468	0.0126142	1.89914	3050	802	215	14276	ENSFCAG00000003622,ENSFCAG00000043283,ENSFCAG00000030869,ENSFCAG00000004831,ENSFCAG00000027384,ENSFCAG00000024950,ENSFCAG00000011941,ENSFCAG00000045314,ENSFCAG00000009332,ENSFCAG00000013070,ENSFCAG00000022198,ENSFCAG00000008561,ENSFCAG00000011147,ENSFCAG00000045850,ENSFCAG00000001624,ENSFCAG00000006941,ENSFCAG00000045383,ENSFCAG00000002535,ENSFCAG00000006319,ENSFCAG00000003572,ENSFCAG00000025745,…
GO:BP	negative regulation of gene expression	GO:0010629	0.0203467	1.69151	1249	802	100	14276	ENSFCAG00000030869,ENSFCAG00000004831,ENSFCAG00000024950,ENSFCAG00000045314,ENSFCAG00000013070,ENSFCAG00000045850,ENSFCAG00000001624,ENSFCAG00000025745,ENSFCAG00000034905,ENSFCAG00000032380,ENSFCAG00000002265,ENSFCAG00000045824,ENSFCAG00000000664,ENSFCAG00000031864,ENSFCAG00000014821,ENSFCAG00000041783,ENSFCAG00000027028,ENSFCAG00000009268,ENSFCAG00000001216,ENSFCAG00000008246,ENSFCAG00000010425,…
GO:BP	peptidyl-lysine acetylation	GO:0018394	0.0203467	1.69151	133	802	19	14276	ENSFCAG00000011941,ENSFCAG00000004503,ENSFCAG00000002265,ENSFCAG00000025121,ENSFCAG00000006154,ENSFCAG00000002475,ENSFCAG00000006880,ENSFCAG00000006713,ENSFCAG00000000038,ENSFCAG00000002640,ENSFCAG00000014173,ENSFCAG00000015033,ENSFCAG00000014496,ENSFCAG00000037751,ENSFCAG00000014195,ENSFCAG00000007661,ENSFCAG00000003536,ENSFCAG00000043985,ENSFCAG00000005712
GO:BP	respiratory tube development	GO:0030323	0.0203467	1.69151	144	802	20	14276	ENSFCAG00000004503,ENSFCAG00000045824,ENSFCAG00000004375,ENSFCAG00000013612,ENSFCAG00000001882,ENSFCAG00000028305,ENSFCAG00000030557,ENSFCAG00000005772,ENSFCAG00000046390,ENSFCAG00000021980,ENSFCAG00000036909,ENSFCAG00000009423,ENSFCAG00000014173,ENSFCAG00000006626,ENSFCAG00000005262,ENSFCAG00000014994,ENSFCAG00000022754,ENSFCAG00000004024,ENSFCAG00000036421,ENSFCAG00000025684
GO:BP	histone acetylation	GO:0016573	0.0212572	1.67249	123	802	18	14276	ENSFCAG00000011941,ENSFCAG00000002265,ENSFCAG00000025121,ENSFCAG00000006154,ENSFCAG00000002475,ENSFCAG00000006880,ENSFCAG00000006713,ENSFCAG00000000038,ENSFCAG00000002640,ENSFCAG00000014173,ENSFCAG00000015033,ENSFCAG00000014496,ENSFCAG00000037751,ENSFCAG00000014195,ENSFCAG00000007661,ENSFCAG00000003536,ENSFCAG00000043985,ENSFCAG00000005712
GO:BP	positive regulation of protein catabolic process in the vacuole	GO:1904352	0.0213868	1.66985	3	802	3	14276	ENSFCAG00000006941,ENSFCAG00000004895,ENSFCAG00000000185
GO:BP	negative regulation of macromolecule metabolic process	GO:0010605	0.0213868	1.66985	1856	802	139	14276	ENSFCAG00000004429,ENSFCAG00000030869,ENSFCAG00000009497,ENSFCAG00000004831,ENSFCAG00000024950,ENSFCAG00000011941,ENSFCAG00000045314,ENSFCAG00000004503,ENSFCAG00000013070,ENSFCAG00000045850,ENSFCAG00000001624,ENSFCAG00000012805,ENSFCAG00000025745,ENSFCAG00000033191,ENSFCAG00000034905,ENSFCAG00000032380,ENSFCAG00000002265,ENSFCAG00000002378,ENSFCAG00000045824,ENSFCAG00000000664,ENSFCAG00000039111,…
GO:BP	positive regulation of nucleobase-containing compound metabolic process	GO:0045935	0.0215571	1.66641	1483	802	115	14276	ENSFCAG00000003622,ENSFCAG00000030869,ENSFCAG00000027384,ENSFCAG00000011941,ENSFCAG00000045314,ENSFCAG00000003304,ENSFCAG00000011147,ENSFCAG00000013709,ENSFCAG00000006941,ENSFCAG00000045383,ENSFCAG00000003572,ENSFCAG00000034905,ENSFCAG00000032380,ENSFCAG00000010767,ENSFCAG00000031864,ENSFCAG00000001542,ENSFCAG00000027028,ENSFCAG00000007627,ENSFCAG00000009268,ENSFCAG00000014453,ENSFCAG00000023460,…
GO:BP	regulation of cellular biosynthetic process	GO:0031326	0.0258273	1.58792	2864	802	201	14276	ENSFCAG00000003622,ENSFCAG00000004429,ENSFCAG00000030869,ENSFCAG00000004831,ENSFCAG00000027384,ENSFCAG00000024950,ENSFCAG00000011941,ENSFCAG00000045314,ENSFCAG00000013070,ENSFCAG00000022198,ENSFCAG00000008561,ENSFCAG00000011147,ENSFCAG00000045850,ENSFCAG00000001624,ENSFCAG00000033714,ENSFCAG00000013709,ENSFCAG00000006941,ENSFCAG00000045383,ENSFCAG00000006319,ENSFCAG00000003572,ENSFCAG00000025745,…
GO:BP	regulation of biosynthetic process	GO:0009889	0.027539	1.56005	2901	802	203	14276	ENSFCAG00000003622,ENSFCAG00000004429,ENSFCAG00000030869,ENSFCAG00000004831,ENSFCAG00000027384,ENSFCAG00000024950,ENSFCAG00000011941,ENSFCAG00000045314,ENSFCAG00000013070,ENSFCAG00000022198,ENSFCAG00000008561,ENSFCAG00000011147,ENSFCAG00000045850,ENSFCAG00000001624,ENSFCAG00000033714,ENSFCAG00000013709,ENSFCAG00000006941,ENSFCAG00000045383,ENSFCAG00000006319,ENSFCAG00000003572,ENSFCAG00000025745,…
GO:BP	cellular component organization	GO:0016043	0.028217	1.54949	4461	802	296	14276	ENSFCAG00000003622,ENSFCAG00000001232,ENSFCAG00000015677,ENSFCAG00000015289,ENSFCAG00000010091,ENSFCAG00000012454,ENSFCAG00000033810,ENSFCAG00000030869,ENSFCAG00000001445,ENSFCAG00000004831,ENSFCAG00000008402,ENSFCAG00000002868,ENSFCAG00000014533,ENSFCAG00000015066,ENSFCAG00000002370,ENSFCAG00000011941,ENSFCAG00000045314,ENSFCAG00000013637,ENSFCAG00000001581,ENSFCAG00000004503,ENSFCAG00000013070,…
GO:BP	regulation of protein metabolic process	GO:0051246	0.0294101	1.5315	2003	802	147	14276	ENSFCAG00000042227,ENSFCAG00000022120,ENSFCAG00000009497,ENSFCAG00000011941,ENSFCAG00000013637,ENSFCAG00000004503,ENSFCAG00000008561,ENSFCAG00000001588,ENSFCAG00000001624,ENSFCAG00000033714,ENSFCAG00000006941,ENSFCAG00000019152,ENSFCAG00000012805,ENSFCAG00000002507,ENSFCAG00000033191,ENSFCAG00000034905,ENSFCAG00000006714,ENSFCAG00000032380,ENSFCAG00000002265,ENSFCAG00000002378,ENSFCAG00000045824,…
GO:BP	stress-activated protein kinase signaling cascade	GO:0031098	0.0294101	1.5315	197	802	24	14276	ENSFCAG00000001588,ENSFCAG00000045824,ENSFCAG00000007712,ENSFCAG00000001882,ENSFCAG00000033140,ENSFCAG00000004595,ENSFCAG00000008573,ENSFCAG00000002640,ENSFCAG00000014840,ENSFCAG00000004420,ENSFCAG00000014944,ENSFCAG00000012780,ENSFCAG00000028243,ENSFCAG00000037711,ENSFCAG00000014173,ENSFCAG00000025302,ENSFCAG00000024083,ENSFCAG00000012392,ENSFCAG00000029229,ENSFCAG00000028725,ENSFCAG00000008712,…
GO:BP	cell-cell signaling	GO:0007267	0.0294101	1.5315	909	802	76	14276	ENSFCAG00000000939,ENSFCAG00000028685,ENSFCAG00000043283,ENSFCAG00000014533,ENSFCAG00000011941,ENSFCAG00000011461,ENSFCAG00000012339,ENSFCAG00000000080,ENSFCAG00000028536,ENSFCAG00000001588,ENSFCAG00000001624,ENSFCAG00000002065,ENSFCAG00000030656,ENSFCAG00000002429,ENSFCAG00000006714,ENSFCAG00000036578,ENSFCAG00000006415,ENSFCAG00000008636,ENSFCAG00000000063,ENSFCAG00000007627,ENSFCAG00000024290,…
GO:BP	positive regulation of cellular biosynthetic process	GO:0031328	0.0294101	1.5315	1514	802	116	14276	ENSFCAG00000003622,ENSFCAG00000030869,ENSFCAG00000027384,ENSFCAG00000011941,ENSFCAG00000045314,ENSFCAG00000008561,ENSFCAG00000011147,ENSFCAG00000033714,ENSFCAG00000013709,ENSFCAG00000006941,ENSFCAG00000045383,ENSFCAG00000003572,ENSFCAG00000034905,ENSFCAG00000000664,ENSFCAG00000031864,ENSFCAG00000001542,ENSFCAG00000027028,ENSFCAG00000007627,ENSFCAG00000009268,ENSFCAG00000014453,ENSFCAG00000008246,…
GO:BP	protein acylation	GO:0043543	0.0294101	1.5315	197	802	24	14276	ENSFCAG00000011941,ENSFCAG00000004503,ENSFCAG00000002265,ENSFCAG00000025121,ENSFCAG00000006154,ENSFCAG00000013434,ENSFCAG00000002475,ENSFCAG00000006880,ENSFCAG00000006713,ENSFCAG00000000038,ENSFCAG00000002640,ENSFCAG00000014173,ENSFCAG00000000600,ENSFCAG00000015033,ENSFCAG00000010264,ENSFCAG00000014496,ENSFCAG00000037751,ENSFCAG00000014195,ENSFCAG00000007661,ENSFCAG00000003536,ENSFCAG00000043985,…
GO:BP	positive regulation of biosynthetic process	GO:0009891	0.0299214	1.52402	1533	802	117	14276	ENSFCAG00000003622,ENSFCAG00000030869,ENSFCAG00000027384,ENSFCAG00000011941,ENSFCAG00000045314,ENSFCAG00000008561,ENSFCAG00000011147,ENSFCAG00000033714,ENSFCAG00000013709,ENSFCAG00000006941,ENSFCAG00000045383,ENSFCAG00000003572,ENSFCAG00000034905,ENSFCAG00000000664,ENSFCAG00000031864,ENSFCAG00000001542,ENSFCAG00000027028,ENSFCAG00000007627,ENSFCAG00000009268,ENSFCAG00000014453,ENSFCAG00000008246,…
GO:BP	response to oxygen-containing compound	GO:1901700	0.0299214	1.52402	837	802	71	14276	ENSFCAG00000000939,ENSFCAG00000029424,ENSFCAG00000012465,ENSFCAG00000011941,ENSFCAG00000011930,ENSFCAG00000033714,ENSFCAG00000045383,ENSFCAG00000030656,ENSFCAG00000021968,ENSFCAG00000032380,ENSFCAG00000026867,ENSFCAG00000011138,ENSFCAG00000029132,ENSFCAG00000000737,ENSFCAG00000007712,ENSFCAG00000028305,ENSFCAG00000009462,ENSFCAG00000011093,ENSFCAG00000044183,ENSFCAG00000018633,ENSFCAG00000002568,…
GO:BP	macromolecule modification	GO:0043412	0.0299808	1.52316	3045	802	211	14276	ENSFCAG00000022120,ENSFCAG00000010710,ENSFCAG00000012454,ENSFCAG00000030869,ENSFCAG00000011941,ENSFCAG00000026735,ENSFCAG00000013637,ENSFCAG00000004503,ENSFCAG00000012672,ENSFCAG00000000621,ENSFCAG00000011147,ENSFCAG00000001588,ENSFCAG00000001624,ENSFCAG00000006941,ENSFCAG00000019152,ENSFCAG00000003876,ENSFCAG00000010004,ENSFCAG00000027060,ENSFCAG00000006721,ENSFCAG00000029255,ENSFCAG00000012805,…
GO:BP	lung development	GO:0030324	0.0323138	1.49061	141	802	19	14276	ENSFCAG00000004503,ENSFCAG00000045824,ENSFCAG00000004375,ENSFCAG00000013612,ENSFCAG00000001882,ENSFCAG00000028305,ENSFCAG00000030557,ENSFCAG00000005772,ENSFCAG00000046390,ENSFCAG00000021980,ENSFCAG00000036909,ENSFCAG00000009423,ENSFCAG00000014173,ENSFCAG00000006626,ENSFCAG00000005262,ENSFCAG00000014994,ENSFCAG00000022754,ENSFCAG00000036421,ENSFCAG00000025684
GO:BP	regulation of localization	GO:0032879	0.0323138	1.49061	1836	802	136	14276	ENSFCAG00000018571,ENSFCAG00000000939,ENSFCAG00000015536,ENSFCAG00000028065,ENSFCAG00000033810,ENSFCAG00000013482,ENSFCAG00000014533,ENSFCAG00000011941,ENSFCAG00000009332,ENSFCAG00000001581,ENSFCAG00000012339,ENSFCAG00000018843,ENSFCAG00000013500,ENSFCAG00000000080,ENSFCAG00000038541,ENSFCAG00000011147,ENSFCAG00000001624,ENSFCAG00000033714,ENSFCAG00000013709,ENSFCAG00000008898,ENSFCAG00000006941,…
GO:BP	bone development	GO:0060348	0.0372379	1.42901	166	802	21	14276	ENSFCAG00000011301,ENSFCAG00000009754,ENSFCAG00000026867,ENSFCAG00000012954,ENSFCAG00000002726,ENSFCAG00000005323,ENSFCAG00000009811,ENSFCAG00000024020,ENSFCAG00000006626,ENSFCAG00000027771,ENSFCAG00000046410,ENSFCAG00000033871,ENSFCAG00000022519,ENSFCAG00000009649,ENSFCAG00000012192,ENSFCAG00000004293,ENSFCAG00000000113,ENSFCAG00000002093,ENSFCAG00000038295,ENSFCAG00000025329,ENSFCAG00000007866
GO:BP	positive regulation of MAPK cascade	GO:0043410	0.0372379	1.42901	367	802	37	14276	ENSFCAG00000022120,ENSFCAG00000011941,ENSFCAG00000006941,ENSFCAG00000045824,ENSFCAG00000010530,ENSFCAG00000004698,ENSFCAG00000006717,ENSFCAG00000007712,ENSFCAG00000045399,ENSFCAG00000013612,ENSFCAG00000016224,ENSFCAG00000001882,ENSFCAG00000033140,ENSFCAG00000013046,ENSFCAG00000015666,ENSFCAG00000036489,ENSFCAG00000005638,ENSFCAG00000004595,ENSFCAG00000008573,ENSFCAG00000014840,ENSFCAG00000004420,…
GO:BP	negative regulation of metabolic process	GO:0009892	0.0405988	1.39149	2023	802	147	14276	ENSFCAG00000004429,ENSFCAG00000030869,ENSFCAG00000009497,ENSFCAG00000004831,ENSFCAG00000024950,ENSFCAG00000011941,ENSFCAG00000045314,ENSFCAG00000004503,ENSFCAG00000013070,ENSFCAG00000045850,ENSFCAG00000001624,ENSFCAG00000012805,ENSFCAG00000025745,ENSFCAG00000033191,ENSFCAG00000034905,ENSFCAG00000032380,ENSFCAG00000002265,ENSFCAG00000002378,ENSFCAG00000045824,ENSFCAG00000000664,ENSFCAG00000039111,…
GO:BP	regulation of neuron differentiation	GO:0045664	0.0427552	1.36901	424	802	41	14276	ENSFCAG00000022120,ENSFCAG00000004831,ENSFCAG00000008402,ENSFCAG00000001581,ENSFCAG00000006714,ENSFCAG00000002378,ENSFCAG00000039189,ENSFCAG00000000063,ENSFCAG00000022073,ENSFCAG00000039686,ENSFCAG00000007627,ENSFCAG00000040232,ENSFCAG00000007794,ENSFCAG00000007712,ENSFCAG00000002632,ENSFCAG00000013612,ENSFCAG00000028305,ENSFCAG00000033140,ENSFCAG00000006154,ENSFCAG00000046390,ENSFCAG00000010082,…
GO:BP	positive regulation of macromolecule biosynthetic process	GO:0010557	0.04609	1.33639	1462	802	111	14276	ENSFCAG00000003622,ENSFCAG00000030869,ENSFCAG00000027384,ENSFCAG00000011941,ENSFCAG00000045314,ENSFCAG00000008561,ENSFCAG00000011147,ENSFCAG00000033714,ENSFCAG00000013709,ENSFCAG00000006941,ENSFCAG00000045383,ENSFCAG00000003572,ENSFCAG00000034905,ENSFCAG00000000664,ENSFCAG00000031864,ENSFCAG00000001542,ENSFCAG00000027028,ENSFCAG00000007627,ENSFCAG00000009268,ENSFCAG00000014453,ENSFCAG00000008246,…
GO:BP	regulation of protein modification process	GO:0031399	0.04609	1.33639	1338	802	103	14276	ENSFCAG00000022120,ENSFCAG00000011941,ENSFCAG00000013637,ENSFCAG00000001588,ENSFCAG00000001624,ENSFCAG00000006941,ENSFCAG00000019152,ENSFCAG00000012805,ENSFCAG00000002507,ENSFCAG00000033191,ENSFCAG00000034905,ENSFCAG00000002265,ENSFCAG00000002378,ENSFCAG00000045824,ENSFCAG00000039111,ENSFCAG00000010530,ENSFCAG00000031864,ENSFCAG00000004698,ENSFCAG00000012716,ENSFCAG00000006717,ENSFCAG00000046381,…
GO:BP	protein acetylation	GO:0006473	0.0468072	1.32969	158	802	20	14276	ENSFCAG00000011941,ENSFCAG00000004503,ENSFCAG00000002265,ENSFCAG00000025121,ENSFCAG00000006154,ENSFCAG00000002475,ENSFCAG00000006880,ENSFCAG00000006713,ENSFCAG00000000038,ENSFCAG00000002640,ENSFCAG00000014173,ENSFCAG00000000600,ENSFCAG00000015033,ENSFCAG00000014496,ENSFCAG00000037751,ENSFCAG00000014195,ENSFCAG00000007661,ENSFCAG00000003536,ENSFCAG00000043985,ENSFCAG00000005712
GO:BP	negative regulation of nitrogen compound metabolic process	GO:0051172	0.0480814	1.31802	1700	802	126	14276	ENSFCAG00000004429,ENSFCAG00000009497,ENSFCAG00000004831,ENSFCAG00000024950,ENSFCAG00000011941,ENSFCAG00000045314,ENSFCAG00000004503,ENSFCAG00000013070,ENSFCAG00000045850,ENSFCAG00000001624,ENSFCAG00000012805,ENSFCAG00000025745,ENSFCAG00000033191,ENSFCAG00000032380,ENSFCAG00000002265,ENSFCAG00000002378,ENSFCAG00000039111,ENSFCAG00000029132,ENSFCAG00000031864,ENSFCAG00000004069,ENSFCAG00000041783,…
GO:BP	histone modification	GO:0016570	0.0492116	1.30793	361	802	36	14276	ENSFCAG00000011941,ENSFCAG00000012672,ENSFCAG00000006319,ENSFCAG00000002265,ENSFCAG00000001216,ENSFCAG00000025121,ENSFCAG00000006154,ENSFCAG00000002475,ENSFCAG00000007506,ENSFCAG00000002568,ENSFCAG00000005065,ENSFCAG00000006880,ENSFCAG00000036909,ENSFCAG00000006713,ENSFCAG00000000038,ENSFCAG00000002640,ENSFCAG00000007256,ENSFCAG00000030285,ENSFCAG00000012780,ENSFCAG00000014173,ENSFCAG00000015435,…
GO:BP	regulation of nucleic acid-templated transcription	GO:1903506	0.0492116	1.30793	2441	802	172	14276	ENSFCAG00000003622,ENSFCAG00000030869,ENSFCAG00000004831,ENSFCAG00000027384,ENSFCAG00000024950,ENSFCAG00000011941,ENSFCAG00000045314,ENSFCAG00000013070,ENSFCAG00000022198,ENSFCAG00000008561,ENSFCAG00000011147,ENSFCAG00000045850,ENSFCAG00000001624,ENSFCAG00000006941,ENSFCAG00000045383,ENSFCAG00000006319,ENSFCAG00000003572,ENSFCAG00000025745,ENSFCAG00000034905,ENSFCAG00000032380,ENSFCAG00000002265,…
GO:BP	generation of neurons	GO:0048699	0.0492116	1.30793	1037	802	83	14276	ENSFCAG00000022120,ENSFCAG00000004831,ENSFCAG00000008402,ENSFCAG00000045314,ENSFCAG00000001581,ENSFCAG00000011461,ENSFCAG00000041275,ENSFCAG00000028536,ENSFCAG00000006714,ENSFCAG00000013435,ENSFCAG00000002378,ENSFCAG00000039189,ENSFCAG00000006415,ENSFCAG00000010530,ENSFCAG00000022134,ENSFCAG00000000063,ENSFCAG00000045847,ENSFCAG00000022073,ENSFCAG00000039686,ENSFCAG00000007627,ENSFCAG00000040232,…
GO:CC	nucleoplasm	GO:0005654	0.0154348	1.8115	2223	820	166	14804	ENSFCAG00000012465,ENSFCAG00000013124,ENSFCAG00000010470,ENSFCAG00000030869,ENSFCAG00000027384,ENSFCAG00000024950,ENSFCAG00000011941,ENSFCAG00000045314,ENSFCAG00000001581,ENSFCAG00000004503,ENSFCAG00000013070,ENSFCAG00000011461,ENSFCAG00000012672,ENSFCAG00000045850,ENSFCAG00000001624,ENSFCAG00000003876,ENSFCAG00000029255,ENSFCAG00000002535,ENSFCAG00000006319,ENSFCAG00000003572,ENSFCAG00000002507,…
gProfiler: fcatus-miR-365
source	term_name	term_id	adjusted_p_value	negative_log10_of_adjusted_p_value	term_size	query_size	intersection_size	effective_domain_size	intersections
GO:BP	morphogenesis of an epithelium	GO:0002009	0.0291729	1.53502	390	339	23	14276	ENSFCAG00000000265,ENSFCAG00000045902,ENSFCAG00000004831,ENSFCAG00000005887,ENSFCAG00000010530,ENSFCAG00000008636,ENSFCAG00000036606,ENSFCAG00000037326,ENSFCAG00000011989,ENSFCAG00000023383,ENSFCAG00000027039,ENSFCAG00000006890,ENSFCAG00000033871,ENSFCAG00000045078,ENSFCAG00000022133,ENSFCAG00000012999,ENSFCAG00000025034,ENSFCAG00000002431,ENSFCAG00000022046,ENSFCAG00000008379,ENSFCAG00000027081,…
GO:BP	cellular response to lipid	GO:0071396	0.0291729	1.53502	355	339	22	14276	ENSFCAG00000000939,ENSFCAG00000010983,ENSFCAG00000026867,ENSFCAG00000031864,ENSFCAG00000031113,ENSFCAG00000002156,ENSFCAG00000000038,ENSFCAG00000027039,ENSFCAG00000024357,ENSFCAG00000013987,ENSFCAG00000029333,ENSFCAG00000033871,ENSFCAG00000014996,ENSFCAG00000009048,ENSFCAG00000012999,ENSFCAG00000002431,ENSFCAG00000014127,ENSFCAG00000022754,ENSFCAG00000008135,ENSFCAG00000010618,ENSFCAG00000037650,…
GO:BP	cellular response to steroid hormone stimulus	GO:0071383	0.0291729	1.53502	163	339	14	14276	ENSFCAG00000010983,ENSFCAG00000031864,ENSFCAG00000031113,ENSFCAG00000002156,ENSFCAG00000027039,ENSFCAG00000024357,ENSFCAG00000029333,ENSFCAG00000014996,ENSFCAG00000002431,ENSFCAG00000014127,ENSFCAG00000022754,ENSFCAG00000010618,ENSFCAG00000037650,ENSFCAG00000026617
GO:BP	response to steroid hormone	GO:0048545	0.0291729	1.53502	193	339	15	14276	ENSFCAG00000010983,ENSFCAG00000031864,ENSFCAG00000031113,ENSFCAG00000002156,ENSFCAG00000027039,ENSFCAG00000024357,ENSFCAG00000029333,ENSFCAG00000014996,ENSFCAG00000002431,ENSFCAG00000008856,ENSFCAG00000014127,ENSFCAG00000022754,ENSFCAG00000010618,ENSFCAG00000037650,ENSFCAG00000026617
GO:BP	negative regulation of cellular process	GO:0048523	0.0291729	1.53502	3350	339	112	14276	ENSFCAG00000042641,ENSFCAG00000000265,ENSFCAG00000010408,ENSFCAG00000045902,ENSFCAG00000004831,ENSFCAG00000010983,ENSFCAG00000011941,ENSFCAG00000026735,ENSFCAG00000029465,ENSFCAG00000003304,ENSFCAG00000030382,ENSFCAG00000005887,ENSFCAG00000022826,ENSFCAG00000014740,ENSFCAG00000025986,ENSFCAG00000002378,ENSFCAG00000026867,ENSFCAG00000006415,ENSFCAG00000001895,ENSFCAG00000029407,ENSFCAG00000010530,…
GO:BP	negative regulation of response to stimulus	GO:0048585	0.0291729	1.53502	1145	339	50	14276	ENSFCAG00000010408,ENSFCAG00000045902,ENSFCAG00000004831,ENSFCAG00000010983,ENSFCAG00000011941,ENSFCAG00000026735,ENSFCAG00000029465,ENSFCAG00000030382,ENSFCAG00000005887,ENSFCAG00000014740,ENSFCAG00000026867,ENSFCAG00000029407,ENSFCAG00000010530,ENSFCAG00000000063,ENSFCAG00000037697,ENSFCAG00000011099,ENSFCAG00000013254,ENSFCAG00000036606,ENSFCAG00000037326,ENSFCAG00000011989,ENSFCAG00000013991,…
GO:BP	negative regulation of signaling	GO:0023057	0.0291729	1.53502	946	339	43	14276	ENSFCAG00000004831,ENSFCAG00000010983,ENSFCAG00000011941,ENSFCAG00000026735,ENSFCAG00000029465,ENSFCAG00000030382,ENSFCAG00000005887,ENSFCAG00000026867,ENSFCAG00000010530,ENSFCAG00000000063,ENSFCAG00000037697,ENSFCAG00000011099,ENSFCAG00000013254,ENSFCAG00000036606,ENSFCAG00000037326,ENSFCAG00000011989,ENSFCAG00000013991,ENSFCAG00000003386,ENSFCAG00000024357,ENSFCAG00000008345,ENSFCAG00000001896,…
GO:BP	negative regulation of cell communication	GO:0010648	0.0291729	1.53502	943	339	42	14276	ENSFCAG00000004831,ENSFCAG00000010983,ENSFCAG00000011941,ENSFCAG00000026735,ENSFCAG00000029465,ENSFCAG00000030382,ENSFCAG00000005887,ENSFCAG00000026867,ENSFCAG00000010530,ENSFCAG00000000063,ENSFCAG00000037697,ENSFCAG00000011099,ENSFCAG00000013254,ENSFCAG00000036606,ENSFCAG00000037326,ENSFCAG00000011989,ENSFCAG00000013991,ENSFCAG00000003386,ENSFCAG00000024357,ENSFCAG00000008345,ENSFCAG00000001896,…
GO:BP	negative regulation of signal transduction	GO:0009968	0.0291729	1.53502	890	339	41	14276	ENSFCAG00000004831,ENSFCAG00000010983,ENSFCAG00000011941,ENSFCAG00000026735,ENSFCAG00000029465,ENSFCAG00000030382,ENSFCAG00000005887,ENSFCAG00000026867,ENSFCAG00000010530,ENSFCAG00000000063,ENSFCAG00000037697,ENSFCAG00000011099,ENSFCAG00000013254,ENSFCAG00000036606,ENSFCAG00000037326,ENSFCAG00000011989,ENSFCAG00000013991,ENSFCAG00000003386,ENSFCAG00000024357,ENSFCAG00000008345,ENSFCAG00000001896,…
GO:BP	negative regulation of multicellular organismal process	GO:0051241	0.0316492	1.49964	827	339	38	14276	ENSFCAG00000000265,ENSFCAG00000010408,ENSFCAG00000010983,ENSFCAG00000011941,ENSFCAG00000029465,ENSFCAG00000014740,ENSFCAG00000002378,ENSFCAG00000006415,ENSFCAG00000000059,ENSFCAG00000000063,ENSFCAG00000013254,ENSFCAG00000037811,ENSFCAG00000011989,ENSFCAG00000003386,ENSFCAG00000010082,ENSFCAG00000000038,ENSFCAG00000027039,ENSFCAG00000006890,ENSFCAG00000024249,ENSFCAG00000001896,ENSFCAG00000029333,…
GO:BP	response to lipid	GO:0033993	0.0357904	1.44623	463	339	25	14276	ENSFCAG00000000939,ENSFCAG00000010983,ENSFCAG00000026867,ENSFCAG00000031864,ENSFCAG00000031113,ENSFCAG00000002156,ENSFCAG00000000038,ENSFCAG00000027039,ENSFCAG00000024357,ENSFCAG00000013987,ENSFCAG00000029333,ENSFCAG00000033871,ENSFCAG00000014996,ENSFCAG00000009048,ENSFCAG00000027533,ENSFCAG00000012999,ENSFCAG00000010795,ENSFCAG00000002431,ENSFCAG00000008856,ENSFCAG00000014127,ENSFCAG00000022754,…
GO:BP	embryonic morphogenesis	GO:0048598	0.0357904	1.44623	489	339	26	14276	ENSFCAG00000004831,ENSFCAG00000045165,ENSFCAG00000026867,ENSFCAG00000036606,ENSFCAG00000037811,ENSFCAG00000037326,ENSFCAG00000011989,ENSFCAG00000027039,ENSFCAG00000006890,ENSFCAG00000011520,ENSFCAG00000033871,ENSFCAG00000014496,ENSFCAG00000015696,ENSFCAG00000011796,ENSFCAG00000031042,ENSFCAG00000022133,ENSFCAG00000012999,ENSFCAG00000025034,ENSFCAG00000022046,ENSFCAG00000033069,ENSFCAG00000027081,…
GO:BP	tissue morphogenesis	GO:0048729	0.0357904	1.44623	494	339	26	14276	ENSFCAG00000000265,ENSFCAG00000045902,ENSFCAG00000004831,ENSFCAG00000005887,ENSFCAG00000045165,ENSFCAG00000014740,ENSFCAG00000010530,ENSFCAG00000008636,ENSFCAG00000036606,ENSFCAG00000037326,ENSFCAG00000011989,ENSFCAG00000023383,ENSFCAG00000027039,ENSFCAG00000006890,ENSFCAG00000033871,ENSFCAG00000045078,ENSFCAG00000022133,ENSFCAG00000012999,ENSFCAG00000025034,ENSFCAG00000002431,ENSFCAG00000022046,…
GO:BP	developmental growth involved in morphogenesis	GO:0060560	0.0357904	1.44623	179	339	14	14276	ENSFCAG00000029532,ENSFCAG00000004159,ENSFCAG00000010530,ENSFCAG00000000063,ENSFCAG00000036606,ENSFCAG00000006890,ENSFCAG00000009702,ENSFCAG00000024249,ENSFCAG00000045078,ENSFCAG00000031474,ENSFCAG00000000323,ENSFCAG00000022133,ENSFCAG00000031300,ENSFCAG00000011817
GO:BP	cellular response to organic cyclic compound	GO:0071407	0.0357904	1.44623	326	339	20	14276	ENSFCAG00000006788,ENSFCAG00000000939,ENSFCAG00000010983,ENSFCAG00000031864,ENSFCAG00000031113,ENSFCAG00000002156,ENSFCAG00000000038,ENSFCAG00000027039,ENSFCAG00000024357,ENSFCAG00000029333,ENSFCAG00000033871,ENSFCAG00000014996,ENSFCAG00000013190,ENSFCAG00000026527,ENSFCAG00000002431,ENSFCAG00000014127,ENSFCAG00000022754,ENSFCAG00000010618,ENSFCAG00000037650,ENSFCAG00000026617
GO:BP	regulation of mRNA stability	GO:0043488	0.0357904	1.44623	64	339	8	14276	ENSFCAG00000037326,ENSFCAG00000002156,ENSFCAG00000027520,ENSFCAG00000010739,ENSFCAG00000008856,ENSFCAG00000023146,ENSFCAG00000014127,ENSFCAG00000026617
GO:BP	wound healing, spreading of cells	GO:0044319	0.0472286	1.32579	24	339	5	14276	ENSFCAG00000000265,ENSFCAG00000004831,ENSFCAG00000005887,ENSFCAG00000010530,ENSFCAG00000033871
GO:BP	epiboly involved in wound healing	GO:0090505	0.0472286	1.32579	24	339	5	14276	ENSFCAG00000000265,ENSFCAG00000004831,ENSFCAG00000005887,ENSFCAG00000010530,ENSFCAG00000033871
GO:BP	epithelial tube morphogenesis	GO:0060562	0.0472286	1.32579	266	339	17	14276	ENSFCAG00000000265,ENSFCAG00000004831,ENSFCAG00000010530,ENSFCAG00000036606,ENSFCAG00000037326,ENSFCAG00000011989,ENSFCAG00000023383,ENSFCAG00000027039,ENSFCAG00000006890,ENSFCAG00000033871,ENSFCAG00000022133,ENSFCAG00000012999,ENSFCAG00000025034,ENSFCAG00000022046,ENSFCAG00000027081,ENSFCAG00000040613,ENSFCAG00000025684
GO:BP	neuron projection extension	GO:1990138	0.0472286	1.32579	125	339	11	14276	ENSFCAG00000029532,ENSFCAG00000004159,ENSFCAG00000010530,ENSFCAG00000000063,ENSFCAG00000006890,ENSFCAG00000009702,ENSFCAG00000024249,ENSFCAG00000031474,ENSFCAG00000000323,ENSFCAG00000031300,ENSFCAG00000011817
gProfiler: fcatus-miR-1247
source	term_name	term_id	adjusted_p_value	negative_log10_of_adjusted_p_value	term_size	query_size	intersection_size	effective_domain_size	intersections
GO:MF	regulatory region nucleic acid binding	GO:0001067	0.0209355	1.67912	747	183	24	13297	ENSFCAG00000004831,ENSFCAG00000011941,ENSFCAG00000006810,ENSFCAG00000004858,ENSFCAG00000038659,ENSFCAG00000018794,ENSFCAG00000023460,ENSFCAG00000040303,ENSFCAG00000009909,ENSFCAG00000033249,ENSFCAG00000011989,ENSFCAG00000011786,ENSFCAG00000027039,ENSFCAG00000010347,ENSFCAG00000006315,ENSFCAG00000004293,ENSFCAG00000023633,ENSFCAG00000006231,ENSFCAG00000006503,ENSFCAG00000011453,ENSFCAG00000030970,…
GO:MF	DNA-binding transcription repressor activity, RNA polymerase II-specific	GO:0001227	0.0209355	1.67912	79	183	7	13297	ENSFCAG00000004831,ENSFCAG00000006810,ENSFCAG00000018794,ENSFCAG00000040303,ENSFCAG00000010347,ENSFCAG00000006315,ENSFCAG00000006231
GO:MF	transcription regulatory region DNA binding	GO:0044212	0.0209355	1.67912	746	183	24	13297	ENSFCAG00000004831,ENSFCAG00000011941,ENSFCAG00000006810,ENSFCAG00000004858,ENSFCAG00000038659,ENSFCAG00000018794,ENSFCAG00000023460,ENSFCAG00000040303,ENSFCAG00000009909,ENSFCAG00000033249,ENSFCAG00000011989,ENSFCAG00000011786,ENSFCAG00000027039,ENSFCAG00000010347,ENSFCAG00000006315,ENSFCAG00000004293,ENSFCAG00000023633,ENSFCAG00000006231,ENSFCAG00000006503,ENSFCAG00000011453,ENSFCAG00000030970,…
GO:MF	RNA polymerase II regulatory region DNA binding	GO:0001012	0.0382425	1.41745	616	183	20	13297	ENSFCAG00000004831,ENSFCAG00000006810,ENSFCAG00000004858,ENSFCAG00000038659,ENSFCAG00000018794,ENSFCAG00000023460,ENSFCAG00000040303,ENSFCAG00000009909,ENSFCAG00000011989,ENSFCAG00000011786,ENSFCAG00000027039,ENSFCAG00000010347,ENSFCAG00000006315,ENSFCAG00000004293,ENSFCAG00000023633,ENSFCAG00000006231,ENSFCAG00000006503,ENSFCAG00000030970,ENSFCAG00000043985,ENSFCAG00000040498
GO:MF	RNA polymerase II regulatory region sequence-specific DNA binding	GO:0000977	0.0382425	1.41745	614	183	20	13297	ENSFCAG00000004831,ENSFCAG00000006810,ENSFCAG00000004858,ENSFCAG00000038659,ENSFCAG00000018794,ENSFCAG00000023460,ENSFCAG00000040303,ENSFCAG00000009909,ENSFCAG00000011989,ENSFCAG00000011786,ENSFCAG00000027039,ENSFCAG00000010347,ENSFCAG00000006315,ENSFCAG00000004293,ENSFCAG00000023633,ENSFCAG00000006231,ENSFCAG00000006503,ENSFCAG00000030970,ENSFCAG00000043985,ENSFCAG00000040498
GO:BP	regulation of short-term neuronal synaptic plasticity	GO:0048172	0.00100343	2.99851	12	188	5	14276	ENSFCAG00000011846,ENSFCAG00000011786,ENSFCAG00000038118,ENSFCAG00000033996,ENSFCAG00000012434
GO:BP	pattern specification process	GO:0007389	0.00699257	2.15536	350	188	17	14276	ENSFCAG00000033553,ENSFCAG00000004858,ENSFCAG00000026867,ENSFCAG00000004661,ENSFCAG00000013612,ENSFCAG00000037326,ENSFCAG00000011989,ENSFCAG00000032832,ENSFCAG00000011786,ENSFCAG00000027039,ENSFCAG00000006691,ENSFCAG00000004293,ENSFCAG00000007884,ENSFCAG00000006503,ENSFCAG00000005266,ENSFCAG00000000089,ENSFCAG00000040498
GO:BP	histone modification	GO:0016570	0.0214304	1.66897	361	188	16	14276	ENSFCAG00000011941,ENSFCAG00000006810,ENSFCAG00000004858,ENSFCAG00000038659,ENSFCAG00000002265,ENSFCAG00000001216,ENSFCAG00000036909,ENSFCAG00000002703,ENSFCAG00000011786,ENSFCAG00000009067,ENSFCAG00000027039,ENSFCAG00000015435,ENSFCAG00000023633,ENSFCAG00000011714,ENSFCAG00000043985,ENSFCAG00000005712
GO:BP	regionalization	GO:0003002	0.0214304	1.66897	286	188	14	14276	ENSFCAG00000033553,ENSFCAG00000026867,ENSFCAG00000004661,ENSFCAG00000013612,ENSFCAG00000037326,ENSFCAG00000011989,ENSFCAG00000032832,ENSFCAG00000011786,ENSFCAG00000027039,ENSFCAG00000004293,ENSFCAG00000007884,ENSFCAG00000005266,ENSFCAG00000000089,ENSFCAG00000040498
GO:BP	covalent chromatin modification	GO:0016569	0.0214304	1.66897	368	188	16	14276	ENSFCAG00000011941,ENSFCAG00000006810,ENSFCAG00000004858,ENSFCAG00000038659,ENSFCAG00000002265,ENSFCAG00000001216,ENSFCAG00000036909,ENSFCAG00000002703,ENSFCAG00000011786,ENSFCAG00000009067,ENSFCAG00000027039,ENSFCAG00000015435,ENSFCAG00000023633,ENSFCAG00000011714,ENSFCAG00000043985,ENSFCAG00000005712
GO:BP	cellular component organization	GO:0016043	0.0222683	1.65231	4461	188	85	14276	ENSFCAG00000009259,ENSFCAG00000015291,ENSFCAG00000015289,ENSFCAG00000006466,ENSFCAG00000004831,ENSFCAG00000002122,ENSFCAG00000012553,ENSFCAG00000011941,ENSFCAG00000006810,ENSFCAG00000004858,ENSFCAG00000035688,ENSFCAG00000004918,ENSFCAG00000026008,ENSFCAG00000003129,ENSFCAG00000013709,ENSFCAG00000005887,ENSFCAG00000010133,ENSFCAG00000038659,ENSFCAG00000012805,ENSFCAG00000007848,ENSFCAG00000002265,…
GO:BP	negative regulation of signaling	GO:0023057	0.0234851	1.62921	946	188	28	14276	ENSFCAG00000004831,ENSFCAG00000011941,ENSFCAG00000006810,ENSFCAG00000035688,ENSFCAG00000005887,ENSFCAG00000034905,ENSFCAG00000018794,ENSFCAG00000001719,ENSFCAG00000026867,ENSFCAG00000000063,ENSFCAG00000013612,ENSFCAG00000037326,ENSFCAG00000011989,ENSFCAG00000011846,ENSFCAG00000042797,ENSFCAG00000022980,ENSFCAG00000006315,ENSFCAG00000014153,ENSFCAG00000006231,ENSFCAG00000027533,ENSFCAG00000013390,…
GO:BP	positive regulation of cellular process	GO:0048522	0.0259624	1.58565	3846	188	74	14276	ENSFCAG00000033553,ENSFCAG00000004831,ENSFCAG00000012553,ENSFCAG00000011941,ENSFCAG00000006810,ENSFCAG00000013500,ENSFCAG00000035688,ENSFCAG00000026008,ENSFCAG00000003129,ENSFCAG00000013709,ENSFCAG00000005887,ENSFCAG00000006941,ENSFCAG00000038659,ENSFCAG00000003572,ENSFCAG00000000924,ENSFCAG00000030466,ENSFCAG00000031222,ENSFCAG00000034905,ENSFCAG00000018794,ENSFCAG00000011417,ENSFCAG00000002265,…
GO:BP	negative regulation of cellular process	GO:0048523	0.0259624	1.58565	3350	188	67	14276	ENSFCAG00000010408,ENSFCAG00000033553,ENSFCAG00000006368,ENSFCAG00000004831,ENSFCAG00000002122,ENSFCAG00000011941,ENSFCAG00000006810,ENSFCAG00000004858,ENSFCAG00000035688,ENSFCAG00000005887,ENSFCAG00000038659,ENSFCAG00000012805,ENSFCAG00000030466,ENSFCAG00000034905,ENSFCAG00000018794,ENSFCAG00000002265,ENSFCAG00000001719,ENSFCAG00000014246,ENSFCAG00000026867,ENSFCAG00000004661,ENSFCAG00000001178,…
GO:BP	negative regulation of apoptotic process	GO:0043066	0.0259624	1.58565	629	188	21	14276	ENSFCAG00000006368,ENSFCAG00000011941,ENSFCAG00000006810,ENSFCAG00000005887,ENSFCAG00000030466,ENSFCAG00000001719,ENSFCAG00000004661,ENSFCAG00000001178,ENSFCAG00000000063,ENSFCAG00000013612,ENSFCAG00000037326,ENSFCAG00000011989,ENSFCAG00000011846,ENSFCAG00000027039,ENSFCAG00000006315,ENSFCAG00000014420,ENSFCAG00000013390,ENSFCAG00000005262,ENSFCAG00000030009,ENSFCAG00000008135,ENSFCAG00000000089
GO:BP	regulation of histone modification	GO:0031056	0.0259624	1.58565	114	188	8	14276	ENSFCAG00000011941,ENSFCAG00000006810,ENSFCAG00000004858,ENSFCAG00000038659,ENSFCAG00000002265,ENSFCAG00000011786,ENSFCAG00000011714,ENSFCAG00000043985
GO:BP	regulation of signaling	GO:0023051	0.0259624	1.58565	2411	188	52	14276	ENSFCAG00000015289,ENSFCAG00000004831,ENSFCAG00000012553,ENSFCAG00000011941,ENSFCAG00000006810,ENSFCAG00000035688,ENSFCAG00000005887,ENSFCAG00000006941,ENSFCAG00000030466,ENSFCAG00000031222,ENSFCAG00000034905,ENSFCAG00000018794,ENSFCAG00000011417,ENSFCAG00000001719,ENSFCAG00000026867,ENSFCAG00000004661,ENSFCAG00000000063,ENSFCAG00000013612,ENSFCAG00000037326,ENSFCAG00000011989,ENSFCAG00000011846,…
GO:BP	regulation of neuronal synaptic plasticity	GO:0048168	0.0259624	1.58565	34	188	5	14276	ENSFCAG00000011846,ENSFCAG00000011786,ENSFCAG00000038118,ENSFCAG00000033996,ENSFCAG00000012434
GO:BP	negative regulation of programmed cell death	GO:0043069	0.0259624	1.58565	641	188	21	14276	ENSFCAG00000006368,ENSFCAG00000011941,ENSFCAG00000006810,ENSFCAG00000005887,ENSFCAG00000030466,ENSFCAG00000001719,ENSFCAG00000004661,ENSFCAG00000001178,ENSFCAG00000000063,ENSFCAG00000013612,ENSFCAG00000037326,ENSFCAG00000011989,ENSFCAG00000011846,ENSFCAG00000027039,ENSFCAG00000006315,ENSFCAG00000014420,ENSFCAG00000013390,ENSFCAG00000005262,ENSFCAG00000030009,ENSFCAG00000008135,ENSFCAG00000000089
GO:BP	cellular component organization or biogenesis	GO:0071840	0.0259624	1.58565	4599	188	85	14276	ENSFCAG00000009259,ENSFCAG00000015291,ENSFCAG00000015289,ENSFCAG00000006466,ENSFCAG00000004831,ENSFCAG00000002122,ENSFCAG00000012553,ENSFCAG00000011941,ENSFCAG00000006810,ENSFCAG00000004858,ENSFCAG00000035688,ENSFCAG00000004918,ENSFCAG00000026008,ENSFCAG00000003129,ENSFCAG00000013709,ENSFCAG00000005887,ENSFCAG00000010133,ENSFCAG00000038659,ENSFCAG00000012805,ENSFCAG00000007848,ENSFCAG00000002265,…
GO:BP	marginal zone B cell differentiation	GO:0002315	0.0259624	1.58565	7	188	3	14276	ENSFCAG00000004661,ENSFCAG00000006691,ENSFCAG00000014420
GO:BP	anterior/posterior pattern specification	GO:0009952	0.0259624	1.58565	179	188	10	14276	ENSFCAG00000033553,ENSFCAG00000004661,ENSFCAG00000011989,ENSFCAG00000032832,ENSFCAG00000011786,ENSFCAG00000027039,ENSFCAG00000004293,ENSFCAG00000007884,ENSFCAG00000000089,ENSFCAG00000040498
GO:BP	negative regulation of cell communication	GO:0010648	0.0259624	1.58565	943	188	27	14276	ENSFCAG00000004831,ENSFCAG00000011941,ENSFCAG00000006810,ENSFCAG00000035688,ENSFCAG00000005887,ENSFCAG00000034905,ENSFCAG00000018794,ENSFCAG00000001719,ENSFCAG00000026867,ENSFCAG00000000063,ENSFCAG00000013612,ENSFCAG00000037326,ENSFCAG00000011989,ENSFCAG00000011846,ENSFCAG00000042797,ENSFCAG00000022980,ENSFCAG00000006315,ENSFCAG00000006231,ENSFCAG00000027533,ENSFCAG00000013390,ENSFCAG00000005266,…
GO:BP	negative regulation of cytokine production	GO:0001818	0.0259624	1.58565	172	188	10	14276	ENSFCAG00000011941,ENSFCAG00000006810,ENSFCAG00000004661,ENSFCAG00000013612,ENSFCAG00000042797,ENSFCAG00000027039,ENSFCAG00000011704,ENSFCAG00000008135,ENSFCAG00000035828,ENSFCAG00000040498
GO:BP	lymphocyte differentiation	GO:0030098	0.0278336	1.55543	257	188	12	14276	ENSFCAG00000006810,ENSFCAG00000030466,ENSFCAG00000026867,ENSFCAG00000004661,ENSFCAG00000011989,ENSFCAG00000036909,ENSFCAG00000027039,ENSFCAG00000006691,ENSFCAG00000004293,ENSFCAG00000011704,ENSFCAG00000014420,ENSFCAG00000000089
GO:BP	regulation of cellular process	GO:0050794	0.0278336	1.55543	8179	188	132	14276	ENSFCAG00000010408,ENSFCAG00000015289,ENSFCAG00000033553,ENSFCAG00000006368,ENSFCAG00000013062,ENSFCAG00000004831,ENSFCAG00000002122,ENSFCAG00000012553,ENSFCAG00000011941,ENSFCAG00000006810,ENSFCAG00000004858,ENSFCAG00000013500,ENSFCAG00000035688,ENSFCAG00000026008,ENSFCAG00000003129,ENSFCAG00000013709,ENSFCAG00000005887,ENSFCAG00000006941,ENSFCAG00000038659,ENSFCAG00000012805,ENSFCAG00000003572,…
GO:BP	leukocyte differentiation	GO:0002521	0.0278336	1.55543	383	188	15	14276	ENSFCAG00000006810,ENSFCAG00000030466,ENSFCAG00000014246,ENSFCAG00000026867,ENSFCAG00000004661,ENSFCAG00000011989,ENSFCAG00000036909,ENSFCAG00000027039,ENSFCAG00000006691,ENSFCAG00000009649,ENSFCAG00000004293,ENSFCAG00000011704,ENSFCAG00000006231,ENSFCAG00000014420,ENSFCAG00000000089
GO:BP	regulation of cell communication	GO:0010646	0.0304695	1.51613	2395	188	51	14276	ENSFCAG00000015289,ENSFCAG00000004831,ENSFCAG00000012553,ENSFCAG00000011941,ENSFCAG00000006810,ENSFCAG00000035688,ENSFCAG00000005887,ENSFCAG00000006941,ENSFCAG00000030466,ENSFCAG00000031222,ENSFCAG00000034905,ENSFCAG00000018794,ENSFCAG00000011417,ENSFCAG00000001719,ENSFCAG00000026867,ENSFCAG00000004661,ENSFCAG00000000063,ENSFCAG00000013612,ENSFCAG00000037326,ENSFCAG00000011989,ENSFCAG00000011846,…
GO:BP	regulation of Notch signaling pathway	GO:0008593	0.0304695	1.51613	65	188	6	14276	ENSFCAG00000011941,ENSFCAG00000006810,ENSFCAG00000004661,ENSFCAG00000006691,ENSFCAG00000037107,ENSFCAG00000000089
GO:BP	negative regulation of multicellular organismal process	GO:0051241	0.0304695	1.51613	827	188	24	14276	ENSFCAG00000010408,ENSFCAG00000011941,ENSFCAG00000006810,ENSFCAG00000004858,ENSFCAG00000035688,ENSFCAG00000018794,ENSFCAG00000001719,ENSFCAG00000014246,ENSFCAG00000004661,ENSFCAG00000000063,ENSFCAG00000013612,ENSFCAG00000011989,ENSFCAG00000042797,ENSFCAG00000030462,ENSFCAG00000022980,ENSFCAG00000027039,ENSFCAG00000011704,ENSFCAG00000006231,ENSFCAG00000014420,ENSFCAG00000007849,ENSFCAG00000033996,…
GO:BP	developmental process	GO:0032502	0.0304695	1.51613	4047	188	76	14276	ENSFCAG00000010408,ENSFCAG00000006466,ENSFCAG00000033553,ENSFCAG00000004831,ENSFCAG00000012553,ENSFCAG00000006810,ENSFCAG00000004858,ENSFCAG00000035688,ENSFCAG00000005887,ENSFCAG00000038659,ENSFCAG00000030466,ENSFCAG00000018794,ENSFCAG00000002265,ENSFCAG00000001719,ENSFCAG00000015429,ENSFCAG00000014246,ENSFCAG00000026867,ENSFCAG00000004661,ENSFCAG00000000063,ENSFCAG00000001216,ENSFCAG00000034143,…
GO:BP	positive regulation of biological process	GO:0048518	0.0304695	1.51613	4388	188	81	14276	ENSFCAG00000033553,ENSFCAG00000006368,ENSFCAG00000004831,ENSFCAG00000012553,ENSFCAG00000011941,ENSFCAG00000006810,ENSFCAG00000013500,ENSFCAG00000035688,ENSFCAG00000026008,ENSFCAG00000003129,ENSFCAG00000013709,ENSFCAG00000005887,ENSFCAG00000006941,ENSFCAG00000038659,ENSFCAG00000003572,ENSFCAG00000000924,ENSFCAG00000030466,ENSFCAG00000031625,ENSFCAG00000031222,ENSFCAG00000034905,ENSFCAG00000018794,…
GO:BP	lymphocyte activation involved in immune response	GO:0002285	0.0338299	1.4707	126	188	8	14276	ENSFCAG00000006810,ENSFCAG00000030466,ENSFCAG00000004661,ENSFCAG00000009795,ENSFCAG00000027039,ENSFCAG00000006691,ENSFCAG00000011704,ENSFCAG00000014420
GO:BP	negative regulation of cell death	GO:0060548	0.0362722	1.44043	689	188	21	14276	ENSFCAG00000006368,ENSFCAG00000011941,ENSFCAG00000006810,ENSFCAG00000005887,ENSFCAG00000030466,ENSFCAG00000001719,ENSFCAG00000004661,ENSFCAG00000001178,ENSFCAG00000000063,ENSFCAG00000013612,ENSFCAG00000037326,ENSFCAG00000011989,ENSFCAG00000011846,ENSFCAG00000027039,ENSFCAG00000006315,ENSFCAG00000014420,ENSFCAG00000013390,ENSFCAG00000005262,ENSFCAG00000030009,ENSFCAG00000008135,ENSFCAG00000000089
GO:BP	neuroblast proliferation	GO:0007405	0.0362722	1.44043	45	188	5	14276	ENSFCAG00000001719,ENSFCAG00000013612,ENSFCAG00000011989,ENSFCAG00000027039,ENSFCAG00000013231
GO:BP	positive regulation of histone modification	GO:0031058	0.0397683	1.40046	71	188	6	14276	ENSFCAG00000011941,ENSFCAG00000006810,ENSFCAG00000038659,ENSFCAG00000002265,ENSFCAG00000011786,ENSFCAG00000043985
GO:BP	regulation of cellular component organization	GO:0051128	0.0403564	1.39409	1701	188	39	14276	ENSFCAG00000015289,ENSFCAG00000004831,ENSFCAG00000002122,ENSFCAG00000012553,ENSFCAG00000011941,ENSFCAG00000006810,ENSFCAG00000004858,ENSFCAG00000035688,ENSFCAG00000026008,ENSFCAG00000003129,ENSFCAG00000013709,ENSFCAG00000005887,ENSFCAG00000038659,ENSFCAG00000012805,ENSFCAG00000002265,ENSFCAG00000004661,ENSFCAG00000000063,ENSFCAG00000007752,ENSFCAG00000013612,ENSFCAG00000023383,ENSFCAG00000006283,…
GO:BP	regulation of response to stimulus	GO:0048583	0.0417435	1.37941	2768	188	56	14276	ENSFCAG00000010408,ENSFCAG00000015289,ENSFCAG00000004831,ENSFCAG00000012553,ENSFCAG00000011941,ENSFCAG00000006810,ENSFCAG00000035688,ENSFCAG00000005887,ENSFCAG00000006941,ENSFCAG00000038659,ENSFCAG00000030466,ENSFCAG00000031625,ENSFCAG00000031222,ENSFCAG00000034905,ENSFCAG00000018794,ENSFCAG00000001719,ENSFCAG00000014246,ENSFCAG00000026867,ENSFCAG00000004661,ENSFCAG00000000063,ENSFCAG00000013612,…
gProfiler: fcatus-Novel-137
source	term_name	term_id	adjusted_p_value	negative_log10_of_adjusted_p_value	term_size	query_size	intersection_size	effective_domain_size	intersections
GO:MF	DNA-binding transcription factor activity, RNA polymerase II-specific	GO:0000981	0.00413086	2.38396	356	522	32	13297	ENSFCAG00000034933,ENSFCAG00000004831,ENSFCAG00000003156,ENSFCAG00000011876,ENSFCAG00000009268,ENSFCAG00000023460,ENSFCAG00000030557,ENSFCAG00000041605,ENSFCAG00000031493,ENSFCAG00000006154,ENSFCAG00000007256,ENSFCAG00000027039,ENSFCAG00000006315,ENSFCAG00000046410,ENSFCAG00000006092,ENSFCAG00000034642,ENSFCAG00000029941,ENSFCAG00000000268,ENSFCAG00000012604,ENSFCAG00000045245,ENSFCAG00000042914,…
GO:MF	nuclear receptor activity	GO:0004879	0.00413086	2.38396	39	522	9	13297	ENSFCAG00000006092,ENSFCAG00000034642,ENSFCAG00000029941,ENSFCAG00000000268,ENSFCAG00000012604,ENSFCAG00000025234,ENSFCAG00000006231,ENSFCAG00000022754,ENSFCAG00000024594
GO:MF	H4 histone acetyltransferase activity	GO:0010485	0.00413086	2.38396	19	522	7	13297	ENSFCAG00000002475,ENSFCAG00000006713,ENSFCAG00000002703,ENSFCAG00000029985,ENSFCAG00000005552,ENSFCAG00000002640,ENSFCAG00000025380
GO:MF	ligand-activated transcription factor activity	GO:0098531	0.00413086	2.38396	39	522	9	13297	ENSFCAG00000006092,ENSFCAG00000034642,ENSFCAG00000029941,ENSFCAG00000000268,ENSFCAG00000012604,ENSFCAG00000025234,ENSFCAG00000006231,ENSFCAG00000022754,ENSFCAG00000024594
GO:MF	steroid hormone receptor activity	GO:0003707	0.00617283	2.20952	52	522	10	13297	ENSFCAG00000027039,ENSFCAG00000006092,ENSFCAG00000034642,ENSFCAG00000029941,ENSFCAG00000000268,ENSFCAG00000012604,ENSFCAG00000025234,ENSFCAG00000006231,ENSFCAG00000022754,ENSFCAG00000024594
GO:MF	frizzled binding	GO:0005109	0.00888339	2.05142	35	522	8	13297	ENSFCAG00000007627,ENSFCAG00000007788,ENSFCAG00000005782,ENSFCAG00000033649,ENSFCAG00000029148,ENSFCAG00000040613,ENSFCAG00000035915,ENSFCAG00000001707
GO:MF	transcription coactivator activity	GO:0003713	0.0292897	1.53328	207	522	20	13297	ENSFCAG00000030869,ENSFCAG00000004893,ENSFCAG00000006880,ENSFCAG00000011470,ENSFCAG00000036909,ENSFCAG00000002133,ENSFCAG00000029985,ENSFCAG00000014905,ENSFCAG00000030482,ENSFCAG00000006092,ENSFCAG00000025234,ENSFCAG00000006231,ENSFCAG00000000043,ENSFCAG00000035168,ENSFCAG00000014195,ENSFCAG00000015482,ENSFCAG00000008945,ENSFCAG00000014127,ENSFCAG00000022754,ENSFCAG00000024594
GO:MF	transcription regulator activity	GO:0140110	0.033161	1.47937	1027	522	63	13297	ENSFCAG00000034933,ENSFCAG00000030869,ENSFCAG00000004831,ENSFCAG00000003156,ENSFCAG00000027154,ENSFCAG00000004893,ENSFCAG00000030382,ENSFCAG00000011876,ENSFCAG00000009268,ENSFCAG00000023460,ENSFCAG00000030557,ENSFCAG00000041605,ENSFCAG00000031493,ENSFCAG00000011519,ENSFCAG00000006154,ENSFCAG00000002156,ENSFCAG00000032832,ENSFCAG00000006880,ENSFCAG00000011470,ENSFCAG00000036909,ENSFCAG00000002133,…
GO:MF	histone acetyltransferase activity	GO:0004402	0.0384081	1.41558	45	522	8	13297	ENSFCAG00000002475,ENSFCAG00000006713,ENSFCAG00000002703,ENSFCAG00000029985,ENSFCAG00000005552,ENSFCAG00000002640,ENSFCAG00000025380,ENSFCAG00000014195
GO:MF	peptide-lysine-N-acetyltransferase activity	GO:0061733	0.0462464	1.33492	47	522	8	13297	ENSFCAG00000002475,ENSFCAG00000006713,ENSFCAG00000002703,ENSFCAG00000029985,ENSFCAG00000005552,ENSFCAG00000002640,ENSFCAG00000025380,ENSFCAG00000014195
GO:MF	protein binding	GO:0005515	0.0462464	1.33492	5273	522	244	13297	ENSFCAG00000023546,ENSFCAG00000000754,ENSFCAG00000028685,ENSFCAG00000001422,ENSFCAG00000034933,ENSFCAG00000012454,ENSFCAG00000012878,ENSFCAG00000004245,ENSFCAG00000028065,ENSFCAG00000030762,ENSFCAG00000012553,ENSFCAG00000001665,ENSFCAG00000013482,ENSFCAG00000009839,ENSFCAG00000011941,ENSFCAG00000004503,ENSFCAG00000000317,ENSFCAG00000002664,ENSFCAG00000041275,ENSFCAG00000018843,ENSFCAG00000022987,…
GO:BP	cellular developmental process	GO:0048869	0.00455199	2.3418	2819	555	156	14276	ENSFCAG00000042818,ENSFCAG00000023546,ENSFCAG00000000754,ENSFCAG00000006466,ENSFCAG00000033553,ENSFCAG00000034933,ENSFCAG00000012878,ENSFCAG00000028065,ENSFCAG00000030762,ENSFCAG00000004831,ENSFCAG00000012553,ENSFCAG00000009839,ENSFCAG00000025939,ENSFCAG00000040814,ENSFCAG00000041275,ENSFCAG00000004893,ENSFCAG00000003923,ENSFCAG00000030382,ENSFCAG00000028536,ENSFCAG00000033714,ENSFCAG00000039949,…
GO:BP	cell differentiation	GO:0030154	0.00580297	2.23635	2663	555	147	14276	ENSFCAG00000042818,ENSFCAG00000023546,ENSFCAG00000000754,ENSFCAG00000006466,ENSFCAG00000033553,ENSFCAG00000034933,ENSFCAG00000012878,ENSFCAG00000028065,ENSFCAG00000030762,ENSFCAG00000004831,ENSFCAG00000012553,ENSFCAG00000009839,ENSFCAG00000025939,ENSFCAG00000040814,ENSFCAG00000041275,ENSFCAG00000004893,ENSFCAG00000003923,ENSFCAG00000030382,ENSFCAG00000028536,ENSFCAG00000033714,ENSFCAG00000039949,…
GO:BP	regulation of developmental process	GO:0050793	0.00580297	2.23635	1797	555	107	14276	ENSFCAG00000006466,ENSFCAG00000034933,ENSFCAG00000030762,ENSFCAG00000004831,ENSFCAG00000001665,ENSFCAG00000004503,ENSFCAG00000025939,ENSFCAG00000040814,ENSFCAG00000004893,ENSFCAG00000030382,ENSFCAG00000028536,ENSFCAG00000007844,ENSFCAG00000009897,ENSFCAG00000030466,ENSFCAG00000002378,ENSFCAG00000045824,ENSFCAG00000001719,ENSFCAG00000033190,ENSFCAG00000014246,ENSFCAG00000041612,ENSFCAG00000039189,…
GO:BP	multicellular organism development	GO:0007275	0.00925829	2.03347	3411	555	174	14276	ENSFCAG00000042818,ENSFCAG00000023546,ENSFCAG00000006466,ENSFCAG00000033553,ENSFCAG00000034933,ENSFCAG00000012878,ENSFCAG00000004245,ENSFCAG00000030762,ENSFCAG00000043283,ENSFCAG00000004831,ENSFCAG00000012553,ENSFCAG00000001665,ENSFCAG00000009839,ENSFCAG00000004503,ENSFCAG00000025939,ENSFCAG00000040814,ENSFCAG00000041275,ENSFCAG00000004893,ENSFCAG00000030382,ENSFCAG00000028536,ENSFCAG00000033714,…
GO:BP	cell-cell signaling	GO:0007267	0.00925829	2.03347	909	555	61	14276	ENSFCAG00000028685,ENSFCAG00000043283,ENSFCAG00000011941,ENSFCAG00000000080,ENSFCAG00000028536,ENSFCAG00000010133,ENSFCAG00000002065,ENSFCAG00000014103,ENSFCAG00000001932,ENSFCAG00000036578,ENSFCAG00000011417,ENSFCAG00000033190,ENSFCAG00000033954,ENSFCAG00000006415,ENSFCAG00000026503,ENSFCAG00000007627,ENSFCAG00000007788,ENSFCAG00000031113,ENSFCAG00000033140,ENSFCAG00000005027,ENSFCAG00000008705,…
GO:BP	intracellular receptor signaling pathway	GO:0030522	0.00925829	2.03347	177	555	20	14276	ENSFCAG00000033553,ENSFCAG00000004893,ENSFCAG00000026867,ENSFCAG00000023857,ENSFCAG00000014905,ENSFCAG00000009998,ENSFCAG00000001230,ENSFCAG00000006092,ENSFCAG00000034642,ENSFCAG00000029941,ENSFCAG00000000268,ENSFCAG00000012604,ENSFCAG00000025234,ENSFCAG00000006231,ENSFCAG00000033649,ENSFCAG00000014127,ENSFCAG00000022754,ENSFCAG00000008135,ENSFCAG00000004294,ENSFCAG00000024594
GO:BP	developmental process	GO:0032502	0.00925829	2.03347	4047	555	201	14276	ENSFCAG00000042818,ENSFCAG00000023546,ENSFCAG00000000754,ENSFCAG00000006466,ENSFCAG00000033553,ENSFCAG00000034933,ENSFCAG00000012878,ENSFCAG00000004245,ENSFCAG00000028065,ENSFCAG00000030762,ENSFCAG00000043283,ENSFCAG00000004831,ENSFCAG00000012553,ENSFCAG00000001665,ENSFCAG00000009839,ENSFCAG00000004503,ENSFCAG00000025939,ENSFCAG00000040814,ENSFCAG00000041275,ENSFCAG00000004893,ENSFCAG00000003923,…
GO:BP	regulation of cell communication	GO:0010646	0.00925829	2.03347	2395	555	130	14276	ENSFCAG00000028685,ENSFCAG00000004831,ENSFCAG00000012553,ENSFCAG00000001665,ENSFCAG00000013482,ENSFCAG00000011941,ENSFCAG00000000317,ENSFCAG00000038541,ENSFCAG00000004893,ENSFCAG00000030382,ENSFCAG00000028536,ENSFCAG00000033714,ENSFCAG00000039949,ENSFCAG00000043888,ENSFCAG00000009897,ENSFCAG00000013172,ENSFCAG00000043201,ENSFCAG00000008546,ENSFCAG00000030466,ENSFCAG00000036578,ENSFCAG00000011417,…
GO:BP	tube development	GO:0035295	0.00925829	2.03347	773	555	54	14276	ENSFCAG00000033553,ENSFCAG00000034933,ENSFCAG00000004831,ENSFCAG00000004503,ENSFCAG00000030382,ENSFCAG00000045824,ENSFCAG00000033190,ENSFCAG00000010530,ENSFCAG00000026503,ENSFCAG00000007627,ENSFCAG00000007788,ENSFCAG00000030923,ENSFCAG00000013445,ENSFCAG00000001882,ENSFCAG00000030557,ENSFCAG00000031493,ENSFCAG00000033140,ENSFCAG00000005027,ENSFCAG00000006154,ENSFCAG00000021980,ENSFCAG00000011470,…
GO:BP	cellular response to steroid hormone stimulus	GO:0071383	0.00925829	2.03347	163	555	19	14276	ENSFCAG00000004893,ENSFCAG00000031113,ENSFCAG00000002156,ENSFCAG00000023857,ENSFCAG00000027039,ENSFCAG00000014905,ENSFCAG00000009998,ENSFCAG00000001230,ENSFCAG00000006092,ENSFCAG00000034642,ENSFCAG00000029941,ENSFCAG00000000268,ENSFCAG00000012604,ENSFCAG00000025234,ENSFCAG00000006231,ENSFCAG00000033649,ENSFCAG00000014127,ENSFCAG00000022754,ENSFCAG00000024594
GO:BP	steroid hormone mediated signaling pathway	GO:0043401	0.00925829	2.03347	134	555	17	14276	ENSFCAG00000004893,ENSFCAG00000023857,ENSFCAG00000027039,ENSFCAG00000014905,ENSFCAG00000009998,ENSFCAG00000001230,ENSFCAG00000006092,ENSFCAG00000034642,ENSFCAG00000029941,ENSFCAG00000000268,ENSFCAG00000012604,ENSFCAG00000025234,ENSFCAG00000006231,ENSFCAG00000033649,ENSFCAG00000014127,ENSFCAG00000022754,ENSFCAG00000024594
GO:BP	histone H4 acetylation	GO:0043967	0.00925829	2.03347	55	555	11	14276	ENSFCAG00000011941,ENSFCAG00000002475,ENSFCAG00000006880,ENSFCAG00000006713,ENSFCAG00000002703,ENSFCAG00000029985,ENSFCAG00000005552,ENSFCAG00000002640,ENSFCAG00000027039,ENSFCAG00000025380,ENSFCAG00000014195
GO:BP	regulation of cell differentiation	GO:0045595	0.00925829	2.03347	1218	555	76	14276	ENSFCAG00000034933,ENSFCAG00000030762,ENSFCAG00000004831,ENSFCAG00000025939,ENSFCAG00000040814,ENSFCAG00000004893,ENSFCAG00000030382,ENSFCAG00000007844,ENSFCAG00000009897,ENSFCAG00000030466,ENSFCAG00000002378,ENSFCAG00000045824,ENSFCAG00000001719,ENSFCAG00000033190,ENSFCAG00000014246,ENSFCAG00000041612,ENSFCAG00000039189,ENSFCAG00000026867,ENSFCAG00000006415,ENSFCAG00000000059,ENSFCAG00000007627,…
GO:BP	response to steroid hormone	GO:0048545	0.00925829	2.03347	193	555	21	14276	ENSFCAG00000004893,ENSFCAG00000031113,ENSFCAG00000010910,ENSFCAG00000002156,ENSFCAG00000043959,ENSFCAG00000023857,ENSFCAG00000027039,ENSFCAG00000014905,ENSFCAG00000009998,ENSFCAG00000001230,ENSFCAG00000006092,ENSFCAG00000034642,ENSFCAG00000029941,ENSFCAG00000000268,ENSFCAG00000012604,ENSFCAG00000025234,ENSFCAG00000006231,ENSFCAG00000033649,ENSFCAG00000014127,ENSFCAG00000022754,ENSFCAG00000024594
GO:BP	animal organ morphogenesis	GO:0009887	0.00925829	2.03347	769	555	54	14276	ENSFCAG00000033553,ENSFCAG00000034933,ENSFCAG00000012878,ENSFCAG00000004893,ENSFCAG00000001831,ENSFCAG00000045824,ENSFCAG00000033190,ENSFCAG00000026867,ENSFCAG00000010530,ENSFCAG00000026503,ENSFCAG00000044465,ENSFCAG00000007627,ENSFCAG00000007788,ENSFCAG00000009268,ENSFCAG00000030557,ENSFCAG00000005027,ENSFCAG00000006154,ENSFCAG00000002726,ENSFCAG00000029226,ENSFCAG00000021980,ENSFCAG00000011470,…
GO:BP	regulation of signaling	GO:0023051	0.00925829	2.03347	2411	555	133	14276	ENSFCAG00000023546,ENSFCAG00000028685,ENSFCAG00000004831,ENSFCAG00000012553,ENSFCAG00000001665,ENSFCAG00000013482,ENSFCAG00000011941,ENSFCAG00000000317,ENSFCAG00000038541,ENSFCAG00000004893,ENSFCAG00000030382,ENSFCAG00000028536,ENSFCAG00000033714,ENSFCAG00000039949,ENSFCAG00000043888,ENSFCAG00000009897,ENSFCAG00000013172,ENSFCAG00000043201,ENSFCAG00000008546,ENSFCAG00000030466,ENSFCAG00000036578,…
GO:BP	anatomical structure development	GO:0048856	0.00928392	2.03227	3817	555	191	14276	ENSFCAG00000042818,ENSFCAG00000023546,ENSFCAG00000000754,ENSFCAG00000006466,ENSFCAG00000033553,ENSFCAG00000034933,ENSFCAG00000012878,ENSFCAG00000004245,ENSFCAG00000030762,ENSFCAG00000043283,ENSFCAG00000004831,ENSFCAG00000012553,ENSFCAG00000001665,ENSFCAG00000009839,ENSFCAG00000004503,ENSFCAG00000025939,ENSFCAG00000040814,ENSFCAG00000041275,ENSFCAG00000004893,ENSFCAG00000003923,ENSFCAG00000030382,…
GO:BP	negative regulation of cellular process	GO:0048523	0.00969993	2.01323	3350	555	171	14276	ENSFCAG00000028685,ENSFCAG00000033553,ENSFCAG00000034933,ENSFCAG00000012878,ENSFCAG00000004831,ENSFCAG00000001665,ENSFCAG00000011941,ENSFCAG00000012795,ENSFCAG00000004503,ENSFCAG00000027154,ENSFCAG00000025939,ENSFCAG00000040814,ENSFCAG00000003923,ENSFCAG00000030382,ENSFCAG00000028536,ENSFCAG00000039949,ENSFCAG00000003931,ENSFCAG00000009897,ENSFCAG00000012937,ENSFCAG00000012805,ENSFCAG00000013172,…
GO:BP	hormone-mediated signaling pathway	GO:0009755	0.00997124	2.00125	170	555	19	14276	ENSFCAG00000004893,ENSFCAG00000011417,ENSFCAG00000023857,ENSFCAG00000027039,ENSFCAG00000025618,ENSFCAG00000014905,ENSFCAG00000009998,ENSFCAG00000001230,ENSFCAG00000006092,ENSFCAG00000034642,ENSFCAG00000029941,ENSFCAG00000000268,ENSFCAG00000012604,ENSFCAG00000025234,ENSFCAG00000006231,ENSFCAG00000033649,ENSFCAG00000014127,ENSFCAG00000022754,ENSFCAG00000024594
GO:BP	anatomical structure morphogenesis	GO:0009653	0.0101434	1.99381	1922	555	108	14276	ENSFCAG00000006466,ENSFCAG00000033553,ENSFCAG00000034933,ENSFCAG00000012878,ENSFCAG00000004831,ENSFCAG00000001665,ENSFCAG00000004893,ENSFCAG00000003923,ENSFCAG00000028536,ENSFCAG00000007844,ENSFCAG00000001831,ENSFCAG00000045824,ENSFCAG00000033190,ENSFCAG00000041612,ENSFCAG00000026867,ENSFCAG00000010530,ENSFCAG00000026503,ENSFCAG00000044465,ENSFCAG00000045847,ENSFCAG00000007627,ENSFCAG00000007788,…
GO:BP	internal protein amino acid acetylation	GO:0006475	0.0104853	1.97942	129	555	16	14276	ENSFCAG00000011941,ENSFCAG00000004503,ENSFCAG00000001748,ENSFCAG00000006154,ENSFCAG00000002475,ENSFCAG00000006880,ENSFCAG00000011470,ENSFCAG00000006713,ENSFCAG00000002703,ENSFCAG00000029985,ENSFCAG00000005552,ENSFCAG00000002640,ENSFCAG00000027039,ENSFCAG00000025380,ENSFCAG00000000600,ENSFCAG00000014195
GO:BP	system development	GO:0048731	0.0111075	1.95438	3182	555	163	14276	ENSFCAG00000042818,ENSFCAG00000023546,ENSFCAG00000006466,ENSFCAG00000033553,ENSFCAG00000034933,ENSFCAG00000012878,ENSFCAG00000004245,ENSFCAG00000030762,ENSFCAG00000004831,ENSFCAG00000012553,ENSFCAG00000001665,ENSFCAG00000009839,ENSFCAG00000004503,ENSFCAG00000025939,ENSFCAG00000040814,ENSFCAG00000041275,ENSFCAG00000004893,ENSFCAG00000030382,ENSFCAG00000028536,ENSFCAG00000033714,ENSFCAG00000039949,…
GO:BP	negative regulation of biological process	GO:0048519	0.0132085	1.87915	3714	555	185	14276	ENSFCAG00000028685,ENSFCAG00000033553,ENSFCAG00000034933,ENSFCAG00000012878,ENSFCAG00000030869,ENSFCAG00000004831,ENSFCAG00000001665,ENSFCAG00000011941,ENSFCAG00000012795,ENSFCAG00000004503,ENSFCAG00000027154,ENSFCAG00000025939,ENSFCAG00000040814,ENSFCAG00000003923,ENSFCAG00000030382,ENSFCAG00000028536,ENSFCAG00000039949,ENSFCAG00000003931,ENSFCAG00000009897,ENSFCAG00000012937,ENSFCAG00000012805,…
GO:BP	protein localization to plasma membrane	GO:0072659	0.0146583	1.83392	193	555	20	14276	ENSFCAG00000013482,ENSFCAG00000009260,ENSFCAG00000026503,ENSFCAG00000024517,ENSFCAG00000029117,ENSFCAG00000029627,ENSFCAG00000030923,ENSFCAG00000005812,ENSFCAG00000002133,ENSFCAG00000024269,ENSFCAG00000006626,ENSFCAG00000036342,ENSFCAG00000044420,ENSFCAG00000002622,ENSFCAG00000030459,ENSFCAG00000040321,ENSFCAG00000036885,ENSFCAG00000037107,ENSFCAG00000014547,ENSFCAG00000004961
GO:BP	cell population proliferation	GO:0008283	0.0146671	1.83366	1324	555	79	14276	ENSFCAG00000033553,ENSFCAG00000009839,ENSFCAG00000031266,ENSFCAG00000004893,ENSFCAG00000026008,ENSFCAG00000039949,ENSFCAG00000013172,ENSFCAG00000043201,ENSFCAG00000030466,ENSFCAG00000045824,ENSFCAG00000001719,ENSFCAG00000033190,ENSFCAG00000014246,ENSFCAG00000041612,ENSFCAG00000011138,ENSFCAG00000002086,ENSFCAG00000010530,ENSFCAG00000000059,ENSFCAG00000026503,ENSFCAG00000037697,ENSFCAG00000009268,…
GO:BP	regulation of response to stimulus	GO:0048583	0.0146671	1.83366	2768	555	144	14276	ENSFCAG00000028685,ENSFCAG00000028065,ENSFCAG00000004831,ENSFCAG00000012553,ENSFCAG00000001665,ENSFCAG00000013482,ENSFCAG00000011941,ENSFCAG00000012795,ENSFCAG00000004503,ENSFCAG00000000317,ENSFCAG00000030671,ENSFCAG00000000080,ENSFCAG00000038541,ENSFCAG00000004893,ENSFCAG00000030382,ENSFCAG00000028536,ENSFCAG00000033714,ENSFCAG00000039949,ENSFCAG00000003931,ENSFCAG00000043888,ENSFCAG00000009897,…
GO:BP	protein localization to cell periphery	GO:1990778	0.0146671	1.83366	225	555	22	14276	ENSFCAG00000013482,ENSFCAG00000009260,ENSFCAG00000026503,ENSFCAG00000024517,ENSFCAG00000029117,ENSFCAG00000029627,ENSFCAG00000030923,ENSFCAG00000007752,ENSFCAG00000005812,ENSFCAG00000002133,ENSFCAG00000024269,ENSFCAG00000006626,ENSFCAG00000036342,ENSFCAG00000044420,ENSFCAG00000002622,ENSFCAG00000030459,ENSFCAG00000040321,ENSFCAG00000036885,ENSFCAG00000037107,ENSFCAG00000014547,ENSFCAG00000004961,…
GO:BP	peptidyl-serine dephosphorylation	GO:0070262	0.017013	1.76922	13	555	5	14276	ENSFCAG00000037697,ENSFCAG00000004936,ENSFCAG00000022215,ENSFCAG00000003915,ENSFCAG00000006161
GO:BP	localization of cell	GO:0051674	0.0176307	1.75373	1108	555	68	14276	ENSFCAG00000034933,ENSFCAG00000012878,ENSFCAG00000004831,ENSFCAG00000013482,ENSFCAG00000013500,ENSFCAG00000033714,ENSFCAG00000008784,ENSFCAG00000010004,ENSFCAG00000012937,ENSFCAG00000045824,ENSFCAG00000001719,ENSFCAG00000033954,ENSFCAG00000040968,ENSFCAG00000011138,ENSFCAG00000010530,ENSFCAG00000045847,ENSFCAG00000037697,ENSFCAG00000024946,ENSFCAG00000030923,ENSFCAG00000031113,ENSFCAG00000001882,…
GO:BP	cell motility	GO:0048870	0.0176307	1.75373	1108	555	68	14276	ENSFCAG00000034933,ENSFCAG00000012878,ENSFCAG00000004831,ENSFCAG00000013482,ENSFCAG00000013500,ENSFCAG00000033714,ENSFCAG00000008784,ENSFCAG00000010004,ENSFCAG00000012937,ENSFCAG00000045824,ENSFCAG00000001719,ENSFCAG00000033954,ENSFCAG00000040968,ENSFCAG00000011138,ENSFCAG00000010530,ENSFCAG00000045847,ENSFCAG00000037697,ENSFCAG00000024946,ENSFCAG00000030923,ENSFCAG00000031113,ENSFCAG00000001882,…
GO:BP	chemical synaptic transmission	GO:0007268	0.0176307	1.75373	402	555	32	14276	ENSFCAG00000028685,ENSFCAG00000043283,ENSFCAG00000000080,ENSFCAG00000028536,ENSFCAG00000010133,ENSFCAG00000002065,ENSFCAG00000014103,ENSFCAG00000001932,ENSFCAG00000036578,ENSFCAG00000011417,ENSFCAG00000026503,ENSFCAG00000007627,ENSFCAG00000031113,ENSFCAG00000008705,ENSFCAG00000023865,ENSFCAG00000018964,ENSFCAG00000008063,ENSFCAG00000024269,ENSFCAG00000009673,ENSFCAG00000026091,ENSFCAG00000004394,…
GO:BP	anterograde trans-synaptic signaling	GO:0098916	0.0176307	1.75373	402	555	32	14276	ENSFCAG00000028685,ENSFCAG00000043283,ENSFCAG00000000080,ENSFCAG00000028536,ENSFCAG00000010133,ENSFCAG00000002065,ENSFCAG00000014103,ENSFCAG00000001932,ENSFCAG00000036578,ENSFCAG00000011417,ENSFCAG00000026503,ENSFCAG00000007627,ENSFCAG00000031113,ENSFCAG00000008705,ENSFCAG00000023865,ENSFCAG00000018964,ENSFCAG00000008063,ENSFCAG00000024269,ENSFCAG00000009673,ENSFCAG00000026091,ENSFCAG00000004394,…
GO:BP	locomotion	GO:0040011	0.0176307	1.75373	1253	555	75	14276	ENSFCAG00000034933,ENSFCAG00000012878,ENSFCAG00000004831,ENSFCAG00000013482,ENSFCAG00000013500,ENSFCAG00000033714,ENSFCAG00000008784,ENSFCAG00000010004,ENSFCAG00000012937,ENSFCAG00000045824,ENSFCAG00000001719,ENSFCAG00000033954,ENSFCAG00000040968,ENSFCAG00000041612,ENSFCAG00000011138,ENSFCAG00000010530,ENSFCAG00000045847,ENSFCAG00000037697,ENSFCAG00000007627,ENSFCAG00000024946,ENSFCAG00000030923,…
GO:BP	internal peptidyl-lysine acetylation	GO:0018393	0.017979	1.74523	126	555	15	14276	ENSFCAG00000011941,ENSFCAG00000004503,ENSFCAG00000001748,ENSFCAG00000006154,ENSFCAG00000002475,ENSFCAG00000006880,ENSFCAG00000011470,ENSFCAG00000006713,ENSFCAG00000002703,ENSFCAG00000029985,ENSFCAG00000005552,ENSFCAG00000002640,ENSFCAG00000027039,ENSFCAG00000025380,ENSFCAG00000014195
GO:BP	histone H4-K8 acetylation	GO:0043982	0.0188002	1.72584	14	555	5	14276	ENSFCAG00000006880,ENSFCAG00000006713,ENSFCAG00000002703,ENSFCAG00000002640,ENSFCAG00000025380
GO:BP	histone H4-K5 acetylation	GO:0043981	0.0188002	1.72584	14	555	5	14276	ENSFCAG00000006880,ENSFCAG00000006713,ENSFCAG00000002703,ENSFCAG00000002640,ENSFCAG00000025380
GO:BP	synaptic signaling	GO:0099536	0.0188002	1.72584	408	555	32	14276	ENSFCAG00000028685,ENSFCAG00000043283,ENSFCAG00000000080,ENSFCAG00000028536,ENSFCAG00000010133,ENSFCAG00000002065,ENSFCAG00000014103,ENSFCAG00000001932,ENSFCAG00000036578,ENSFCAG00000011417,ENSFCAG00000026503,ENSFCAG00000007627,ENSFCAG00000031113,ENSFCAG00000008705,ENSFCAG00000023865,ENSFCAG00000018964,ENSFCAG00000008063,ENSFCAG00000024269,ENSFCAG00000009673,ENSFCAG00000026091,ENSFCAG00000004394,…
GO:BP	cell surface receptor signaling pathway	GO:0007166	0.0188002	1.72584	1870	555	103	14276	ENSFCAG00000028685,ENSFCAG00000011941,ENSFCAG00000004503,ENSFCAG00000000317,ENSFCAG00000000080,ENSFCAG00000038541,ENSFCAG00000030382,ENSFCAG00000028536,ENSFCAG00000033714,ENSFCAG00000007844,ENSFCAG00000015259,ENSFCAG00000008546,ENSFCAG00000014103,ENSFCAG00000001932,ENSFCAG00000030466,ENSFCAG00000011417,ENSFCAG00000045824,ENSFCAG00000001719,ENSFCAG00000033190,ENSFCAG00000033954,ENSFCAG00000006415,…
GO:BP	trans-synaptic signaling	GO:0099537	0.0188002	1.72584	408	555	32	14276	ENSFCAG00000028685,ENSFCAG00000043283,ENSFCAG00000000080,ENSFCAG00000028536,ENSFCAG00000010133,ENSFCAG00000002065,ENSFCAG00000014103,ENSFCAG00000001932,ENSFCAG00000036578,ENSFCAG00000011417,ENSFCAG00000026503,ENSFCAG00000007627,ENSFCAG00000031113,ENSFCAG00000008705,ENSFCAG00000023865,ENSFCAG00000018964,ENSFCAG00000008063,ENSFCAG00000024269,ENSFCAG00000009673,ENSFCAG00000026091,ENSFCAG00000004394,…
GO:BP	tissue development	GO:0009888	0.0206498	1.68508	1354	555	79	14276	ENSFCAG00000000754,ENSFCAG00000033553,ENSFCAG00000034933,ENSFCAG00000012878,ENSFCAG00000004831,ENSFCAG00000004893,ENSFCAG00000030382,ENSFCAG00000014103,ENSFCAG00000001831,ENSFCAG00000045824,ENSFCAG00000033190,ENSFCAG00000026867,ENSFCAG00000010530,ENSFCAG00000026503,ENSFCAG00000044465,ENSFCAG00000028518,ENSFCAG00000007627,ENSFCAG00000007788,ENSFCAG00000009268,ENSFCAG00000013445,ENSFCAG00000015148,…
GO:BP	cell migration	GO:0016477	0.0215045	1.66747	999	555	62	14276	ENSFCAG00000034933,ENSFCAG00000012878,ENSFCAG00000004831,ENSFCAG00000013482,ENSFCAG00000033714,ENSFCAG00000008784,ENSFCAG00000010004,ENSFCAG00000012937,ENSFCAG00000045824,ENSFCAG00000033954,ENSFCAG00000040968,ENSFCAG00000011138,ENSFCAG00000010530,ENSFCAG00000045847,ENSFCAG00000037697,ENSFCAG00000024946,ENSFCAG00000030923,ENSFCAG00000031113,ENSFCAG00000001882,ENSFCAG00000030557,ENSFCAG00000025187,…
GO:BP	regulation of multicellular organismal process	GO:0051239	0.0216411	1.66472	2129	555	114	14276	ENSFCAG00000023546,ENSFCAG00000006466,ENSFCAG00000034933,ENSFCAG00000012878,ENSFCAG00000030762,ENSFCAG00000004831,ENSFCAG00000001665,ENSFCAG00000011941,ENSFCAG00000004503,ENSFCAG00000025939,ENSFCAG00000040814,ENSFCAG00000004893,ENSFCAG00000003923,ENSFCAG00000030382,ENSFCAG00000028536,ENSFCAG00000033714,ENSFCAG00000039949,ENSFCAG00000003931,ENSFCAG00000030466,ENSFCAG00000045076,ENSFCAG00000002378,…
GO:BP	regulation of signal transduction	GO:0009966	0.0230619	1.6371	2180	555	116	14276	ENSFCAG00000028685,ENSFCAG00000004831,ENSFCAG00000012553,ENSFCAG00000001665,ENSFCAG00000013482,ENSFCAG00000011941,ENSFCAG00000000317,ENSFCAG00000038541,ENSFCAG00000004893,ENSFCAG00000030382,ENSFCAG00000028536,ENSFCAG00000033714,ENSFCAG00000039949,ENSFCAG00000043888,ENSFCAG00000009897,ENSFCAG00000013172,ENSFCAG00000043201,ENSFCAG00000008546,ENSFCAG00000030466,ENSFCAG00000045824,ENSFCAG00000001719,…
GO:BP	cellular response to organic cyclic compound	GO:0071407	0.0230619	1.6371	326	555	27	14276	ENSFCAG00000004893,ENSFCAG00000001719,ENSFCAG00000031113,ENSFCAG00000030557,ENSFCAG00000002156,ENSFCAG00000021980,ENSFCAG00000002133,ENSFCAG00000023857,ENSFCAG00000027039,ENSFCAG00000014905,ENSFCAG00000013821,ENSFCAG00000009998,ENSFCAG00000001230,ENSFCAG00000006092,ENSFCAG00000034642,ENSFCAG00000029941,ENSFCAG00000000268,ENSFCAG00000012604,ENSFCAG00000005082,ENSFCAG00000029229,ENSFCAG00000025234,…
GO:BP	tube morphogenesis	GO:0035239	0.0237639	1.62408	624	555	43	14276	ENSFCAG00000034933,ENSFCAG00000004831,ENSFCAG00000045824,ENSFCAG00000033190,ENSFCAG00000010530,ENSFCAG00000026503,ENSFCAG00000007627,ENSFCAG00000007788,ENSFCAG00000030923,ENSFCAG00000001882,ENSFCAG00000030557,ENSFCAG00000031493,ENSFCAG00000033140,ENSFCAG00000005027,ENSFCAG00000006154,ENSFCAG00000011470,ENSFCAG00000036909,ENSFCAG00000002133,ENSFCAG00000009679,ENSFCAG00000027039,ENSFCAG00000036549,…
GO:BP	peptidyl-lysine acetylation	GO:0018394	0.0244318	1.61204	133	555	15	14276	ENSFCAG00000011941,ENSFCAG00000004503,ENSFCAG00000001748,ENSFCAG00000006154,ENSFCAG00000002475,ENSFCAG00000006880,ENSFCAG00000011470,ENSFCAG00000006713,ENSFCAG00000002703,ENSFCAG00000029985,ENSFCAG00000005552,ENSFCAG00000002640,ENSFCAG00000027039,ENSFCAG00000025380,ENSFCAG00000014195
GO:BP	proximal/distal axis specification	GO:0009946	0.0265766	1.5755	4	555	3	14276	ENSFCAG00000001230,ENSFCAG00000035168,ENSFCAG00000001707
GO:BP	protein localization to membrane	GO:0072657	0.0275434	1.55998	367	555	29	14276	ENSFCAG00000013482,ENSFCAG00000009962,ENSFCAG00000004503,ENSFCAG00000009260,ENSFCAG00000012937,ENSFCAG00000026503,ENSFCAG00000007627,ENSFCAG00000024517,ENSFCAG00000029117,ENSFCAG00000029627,ENSFCAG00000030923,ENSFCAG00000005812,ENSFCAG00000009795,ENSFCAG00000002133,ENSFCAG00000024269,ENSFCAG00000006626,ENSFCAG00000006291,ENSFCAG00000036342,ENSFCAG00000044420,ENSFCAG00000002622,ENSFCAG00000008819,…
GO:BP	non-canonical Wnt signaling pathway	GO:0035567	0.0285242	1.54479	44	555	8	14276	ENSFCAG00000006415,ENSFCAG00000007627,ENSFCAG00000007788,ENSFCAG00000033140,ENSFCAG00000005027,ENSFCAG00000045078,ENSFCAG00000033649,ENSFCAG00000040613
GO:BP	response to hormone	GO:0009725	0.0285242	1.54479	479	555	35	14276	ENSFCAG00000000317,ENSFCAG00000018843,ENSFCAG00000004893,ENSFCAG00000011417,ENSFCAG00000031113,ENSFCAG00000031493,ENSFCAG00000010910,ENSFCAG00000002156,ENSFCAG00000021980,ENSFCAG00000043959,ENSFCAG00000023857,ENSFCAG00000027039,ENSFCAG00000025618,ENSFCAG00000014905,ENSFCAG00000013821,ENSFCAG00000006291,ENSFCAG00000009998,ENSFCAG00000001230,ENSFCAG00000006092,ENSFCAG00000034642,ENSFCAG00000029941,…
GO:BP	negative regulation of response to stimulus	GO:0048585	0.02927	1.53358	1145	555	68	14276	ENSFCAG00000028685,ENSFCAG00000004831,ENSFCAG00000011941,ENSFCAG00000012795,ENSFCAG00000030382,ENSFCAG00000028536,ENSFCAG00000003931,ENSFCAG00000008546,ENSFCAG00000001719,ENSFCAG00000033190,ENSFCAG00000033954,ENSFCAG00000040968,ENSFCAG00000026867,ENSFCAG00000010530,ENSFCAG00000026503,ENSFCAG00000038521,ENSFCAG00000037697,ENSFCAG00000046381,ENSFCAG00000007627,ENSFCAG00000009456,ENSFCAG00000009802,…
GO:BP	movement of cell or subcellular component	GO:0006928	0.02927	1.53358	1402	555	80	14276	ENSFCAG00000034933,ENSFCAG00000012878,ENSFCAG00000030762,ENSFCAG00000004831,ENSFCAG00000013482,ENSFCAG00000013500,ENSFCAG00000033714,ENSFCAG00000008784,ENSFCAG00000010004,ENSFCAG00000012937,ENSFCAG00000045824,ENSFCAG00000001719,ENSFCAG00000033954,ENSFCAG00000040968,ENSFCAG00000011138,ENSFCAG00000010530,ENSFCAG00000026503,ENSFCAG00000045847,ENSFCAG00000037697,ENSFCAG00000007627,ENSFCAG00000024946,…
GO:BP	cell surface receptor signaling pathway involved in cell-cell signaling	GO:1905114	0.0299125	1.52415	371	555	29	14276	ENSFCAG00000028685,ENSFCAG00000028536,ENSFCAG00000014103,ENSFCAG00000001932,ENSFCAG00000033190,ENSFCAG00000006415,ENSFCAG00000007627,ENSFCAG00000007788,ENSFCAG00000033140,ENSFCAG00000005027,ENSFCAG00000011470,ENSFCAG00000023857,ENSFCAG00000027039,ENSFCAG00000025618,ENSFCAG00000009673,ENSFCAG00000045078,ENSFCAG00000005082,ENSFCAG00000005782,ENSFCAG00000024654,ENSFCAG00000033649,ENSFCAG00000038195,…
GO:BP	histone acetylation	GO:0016573	0.0305389	1.51515	123	555	14	14276	ENSFCAG00000011941,ENSFCAG00000001748,ENSFCAG00000006154,ENSFCAG00000002475,ENSFCAG00000006880,ENSFCAG00000011470,ENSFCAG00000006713,ENSFCAG00000002703,ENSFCAG00000029985,ENSFCAG00000005552,ENSFCAG00000002640,ENSFCAG00000027039,ENSFCAG00000025380,ENSFCAG00000014195
GO:BP	negative regulation of cell population proliferation	GO:0008285	0.032153	1.49278	447	555	33	14276	ENSFCAG00000033553,ENSFCAG00000013172,ENSFCAG00000001719,ENSFCAG00000033190,ENSFCAG00000010530,ENSFCAG00000026503,ENSFCAG00000037697,ENSFCAG00000031493,ENSFCAG00000006154,ENSFCAG00000037811,ENSFCAG00000021980,ENSFCAG00000006880,ENSFCAG00000000295,ENSFCAG00000046410,ENSFCAG00000014883,ENSFCAG00000006601,ENSFCAG00000026091,ENSFCAG00000001230,ENSFCAG00000029941,ENSFCAG00000023330,ENSFCAG00000025234,…
GO:BP	regulation of multicellular organismal development	GO:2000026	0.0322373	1.49164	1388	555	79	14276	ENSFCAG00000034933,ENSFCAG00000030762,ENSFCAG00000004831,ENSFCAG00000001665,ENSFCAG00000004503,ENSFCAG00000025939,ENSFCAG00000040814,ENSFCAG00000004893,ENSFCAG00000030382,ENSFCAG00000028536,ENSFCAG00000030466,ENSFCAG00000002378,ENSFCAG00000045824,ENSFCAG00000001719,ENSFCAG00000033190,ENSFCAG00000014246,ENSFCAG00000039189,ENSFCAG00000026867,ENSFCAG00000006415,ENSFCAG00000000059,ENSFCAG00000026503,…
GO:BP	nervous system development	GO:0007399	0.034845	1.45786	1502	555	84	14276	ENSFCAG00000042818,ENSFCAG00000006466,ENSFCAG00000033553,ENSFCAG00000034933,ENSFCAG00000004831,ENSFCAG00000012553,ENSFCAG00000001665,ENSFCAG00000004503,ENSFCAG00000025939,ENSFCAG00000041275,ENSFCAG00000030382,ENSFCAG00000028536,ENSFCAG00000001932,ENSFCAG00000030466,ENSFCAG00000002378,ENSFCAG00000001719,ENSFCAG00000039189,ENSFCAG00000006415,ENSFCAG00000010530,ENSFCAG00000000059,ENSFCAG00000026503,…
GO:BP	appendage development	GO:0048736	0.034845	1.45786	156	555	16	14276	ENSFCAG00000033553,ENSFCAG00000034933,ENSFCAG00000026867,ENSFCAG00000005027,ENSFCAG00000037811,ENSFCAG00000043446,ENSFCAG00000027039,ENSFCAG00000046410,ENSFCAG00000029941,ENSFCAG00000027896,ENSFCAG00000005782,ENSFCAG00000024654,ENSFCAG00000009569,ENSFCAG00000029706,ENSFCAG00000015482,ENSFCAG00000046271
GO:BP	muscle cell differentiation	GO:0042692	0.034845	1.45786	254	555	22	14276	ENSFCAG00000006466,ENSFCAG00000003923,ENSFCAG00000007844,ENSFCAG00000041612,ENSFCAG00000026867,ENSFCAG00000029117,ENSFCAG00000030557,ENSFCAG00000031493,ENSFCAG00000002156,ENSFCAG00000021980,ENSFCAG00000030482,ENSFCAG00000006626,ENSFCAG00000046410,ENSFCAG00000001124,ENSFCAG00000006117,ENSFCAG00000024818,ENSFCAG00000015580,ENSFCAG00000045432,ENSFCAG00000027835,ENSFCAG00000015262,ENSFCAG00000025180,…
GO:BP	limb development	GO:0060173	0.034845	1.45786	156	555	16	14276	ENSFCAG00000033553,ENSFCAG00000034933,ENSFCAG00000026867,ENSFCAG00000005027,ENSFCAG00000037811,ENSFCAG00000043446,ENSFCAG00000027039,ENSFCAG00000046410,ENSFCAG00000029941,ENSFCAG00000027896,ENSFCAG00000005782,ENSFCAG00000024654,ENSFCAG00000009569,ENSFCAG00000029706,ENSFCAG00000015482,ENSFCAG00000046271
GO:BP	embryonic morphogenesis	GO:0048598	0.034845	1.45786	489	555	35	14276	ENSFCAG00000033553,ENSFCAG00000034933,ENSFCAG00000004831,ENSFCAG00000026867,ENSFCAG00000026503,ENSFCAG00000007627,ENSFCAG00000007788,ENSFCAG00000030557,ENSFCAG00000005027,ENSFCAG00000006154,ENSFCAG00000037811,ENSFCAG00000043446,ENSFCAG00000043959,ENSFCAG00000023857,ENSFCAG00000027039,ENSFCAG00000006626,ENSFCAG00000046410,ENSFCAG00000011661,ENSFCAG00000001230,ENSFCAG00000011796,ENSFCAG00000025034,…
GO:BP	localization	GO:0051179	0.0348658	1.4576	4500	555	212	14276	ENSFCAG00000023546,ENSFCAG00000006466,ENSFCAG00000034933,ENSFCAG00000003237,ENSFCAG00000012878,ENSFCAG00000004245,ENSFCAG00000028065,ENSFCAG00000004258,ENSFCAG00000030762,ENSFCAG00000043283,ENSFCAG00000004831,ENSFCAG00000013482,ENSFCAG00000009962,ENSFCAG00000011941,ENSFCAG00000004883,ENSFCAG00000000364,ENSFCAG00000004503,ENSFCAG00000002664,ENSFCAG00000009260,ENSFCAG00000025653,ENSFCAG00000007078,…
GO:BP	regulation of anatomical structure morphogenesis	GO:0022603	0.0358375	1.44566	726	555	47	14276	ENSFCAG00000004831,ENSFCAG00000004893,ENSFCAG00000007844,ENSFCAG00000041612,ENSFCAG00000026503,ENSFCAG00000007627,ENSFCAG00000007788,ENSFCAG00000029117,ENSFCAG00000030923,ENSFCAG00000007752,ENSFCAG00000001882,ENSFCAG00000031493,ENSFCAG00000033140,ENSFCAG00000005027,ENSFCAG00000006154,ENSFCAG00000043446,ENSFCAG00000043959,ENSFCAG00000011470,ENSFCAG00000002133,ENSFCAG00000009679,ENSFCAG00000031897,…
GO:BP	spindle organization	GO:0007051	0.0358899	1.44503	127	555	14	14276	ENSFCAG00000012553,ENSFCAG00000012795,ENSFCAG00000025745,ENSFCAG00000002086,ENSFCAG00000026503,ENSFCAG00000027704,ENSFCAG00000002156,ENSFCAG00000031881,ENSFCAG00000044309,ENSFCAG00000001124,ENSFCAG00000009998,ENSFCAG00000011053,ENSFCAG00000003915,ENSFCAG00000027444
GO:BP	modulation of chemical synaptic transmission	GO:0050804	0.0359076	1.44481	222	555	20	14276	ENSFCAG00000028685,ENSFCAG00000028536,ENSFCAG00000036578,ENSFCAG00000011417,ENSFCAG00000031113,ENSFCAG00000008705,ENSFCAG00000018964,ENSFCAG00000008063,ENSFCAG00000024269,ENSFCAG00000009673,ENSFCAG00000026091,ENSFCAG00000004394,ENSFCAG00000005082,ENSFCAG00000024553,ENSFCAG00000011053,ENSFCAG00000002373,ENSFCAG00000026527,ENSFCAG00000025180,ENSFCAG00000030459,ENSFCAG00000038118
GO:BP	protein acetylation	GO:0006473	0.0364909	1.43781	158	555	16	14276	ENSFCAG00000011941,ENSFCAG00000004503,ENSFCAG00000001748,ENSFCAG00000006154,ENSFCAG00000002475,ENSFCAG00000006880,ENSFCAG00000011470,ENSFCAG00000006713,ENSFCAG00000002703,ENSFCAG00000029985,ENSFCAG00000005552,ENSFCAG00000002640,ENSFCAG00000027039,ENSFCAG00000025380,ENSFCAG00000000600,ENSFCAG00000014195
GO:BP	regulation of trans-synaptic signaling	GO:0099177	0.0365013	1.43769	223	555	20	14276	ENSFCAG00000028685,ENSFCAG00000028536,ENSFCAG00000036578,ENSFCAG00000011417,ENSFCAG00000031113,ENSFCAG00000008705,ENSFCAG00000018964,ENSFCAG00000008063,ENSFCAG00000024269,ENSFCAG00000009673,ENSFCAG00000026091,ENSFCAG00000004394,ENSFCAG00000005082,ENSFCAG00000024553,ENSFCAG00000011053,ENSFCAG00000002373,ENSFCAG00000026527,ENSFCAG00000025180,ENSFCAG00000030459,ENSFCAG00000038118
GO:BP	positive regulation of biological process	GO:0048518	0.0365013	1.43769	4388	555	207	14276	ENSFCAG00000023546,ENSFCAG00000000754,ENSFCAG00000028685,ENSFCAG00000033553,ENSFCAG00000034933,ENSFCAG00000012454,ENSFCAG00000028065,ENSFCAG00000030762,ENSFCAG00000030869,ENSFCAG00000004831,ENSFCAG00000012553,ENSFCAG00000013482,ENSFCAG00000003156,ENSFCAG00000009839,ENSFCAG00000011941,ENSFCAG00000004503,ENSFCAG00000000317,ENSFCAG00000025939,ENSFCAG00000030671,ENSFCAG00000018843,ENSFCAG00000013500,…
GO:BP	divalent inorganic cation transport	GO:0072511	0.0369377	1.43253	310	555	25	14276	ENSFCAG00000006466,ENSFCAG00000012878,ENSFCAG00000010902,ENSFCAG00000018843,ENSFCAG00000013500,ENSFCAG00000000080,ENSFCAG00000038541,ENSFCAG00000003923,ENSFCAG00000003931,ENSFCAG00000012937,ENSFCAG00000013172,ENSFCAG00000001831,ENSFCAG00000015741,ENSFCAG00000041612,ENSFCAG00000029627,ENSFCAG00000018633,ENSFCAG00000038903,ENSFCAG00000018964,ENSFCAG00000001105,ENSFCAG00000024723,ENSFCAG00000001952,…
GO:BP	divalent metal ion transport	GO:0070838	0.0369377	1.43253	310	555	25	14276	ENSFCAG00000006466,ENSFCAG00000012878,ENSFCAG00000010902,ENSFCAG00000018843,ENSFCAG00000013500,ENSFCAG00000000080,ENSFCAG00000038541,ENSFCAG00000003923,ENSFCAG00000003931,ENSFCAG00000012937,ENSFCAG00000013172,ENSFCAG00000001831,ENSFCAG00000015741,ENSFCAG00000041612,ENSFCAG00000029627,ENSFCAG00000018633,ENSFCAG00000038903,ENSFCAG00000018964,ENSFCAG00000001105,ENSFCAG00000024723,ENSFCAG00000001952,…
GO:BP	respiratory tube development	GO:0030323	0.0376106	1.42469	144	555	15	14276	ENSFCAG00000033553,ENSFCAG00000004503,ENSFCAG00000045824,ENSFCAG00000001882,ENSFCAG00000030557,ENSFCAG00000021980,ENSFCAG00000036909,ENSFCAG00000006626,ENSFCAG00000001230,ENSFCAG00000027896,ENSFCAG00000005782,ENSFCAG00000025180,ENSFCAG00000005262,ENSFCAG00000022754,ENSFCAG00000036315
GO:BP	negative regulation of Notch signaling pathway	GO:0045746	0.0378083	1.42241	27	555	6	14276	ENSFCAG00000011941,ENSFCAG00000030382,ENSFCAG00000038521,ENSFCAG00000006154,ENSFCAG00000006626,ENSFCAG00000026091
GO:BP	limb morphogenesis	GO:0035108	0.0437532	1.35899	132	555	14	14276	ENSFCAG00000033553,ENSFCAG00000034933,ENSFCAG00000026867,ENSFCAG00000005027,ENSFCAG00000037811,ENSFCAG00000043446,ENSFCAG00000027039,ENSFCAG00000046410,ENSFCAG00000027896,ENSFCAG00000005782,ENSFCAG00000024654,ENSFCAG00000029706,ENSFCAG00000015482,ENSFCAG00000046271
GO:BP	anterior/posterior pattern specification	GO:0009952	0.0437532	1.35899	179	555	17	14276	ENSFCAG00000033553,ENSFCAG00000034933,ENSFCAG00000033190,ENSFCAG00000030557,ENSFCAG00000032832,ENSFCAG00000027039,ENSFCAG00000046410,ENSFCAG00000001230,ENSFCAG00000029941,ENSFCAG00000027896,ENSFCAG00000025483,ENSFCAG00000009609,ENSFCAG00000033649,ENSFCAG00000035168,ENSFCAG00000025180,ENSFCAG00000036315,ENSFCAG00000001707
GO:BP	response to organic cyclic compound	GO:0014070	0.0437532	1.35899	445	555	32	14276	ENSFCAG00000004893,ENSFCAG00000001719,ENSFCAG00000006965,ENSFCAG00000031113,ENSFCAG00000030557,ENSFCAG00000010910,ENSFCAG00000002156,ENSFCAG00000021980,ENSFCAG00000043959,ENSFCAG00000002133,ENSFCAG00000023857,ENSFCAG00000027039,ENSFCAG00000014905,ENSFCAG00000013821,ENSFCAG00000009998,ENSFCAG00000001230,ENSFCAG00000006092,ENSFCAG00000034642,ENSFCAG00000029941,ENSFCAG00000000268,ENSFCAG00000012604,…
GO:BP	cellular component organization	GO:0016043	0.0437532	1.35899	4461	555	209	14276	ENSFCAG00000042818,ENSFCAG00000023546,ENSFCAG00000000754,ENSFCAG00000006466,ENSFCAG00000012454,ENSFCAG00000012878,ENSFCAG00000030762,ENSFCAG00000030869,ENSFCAG00000004831,ENSFCAG00000012553,ENSFCAG00000001665,ENSFCAG00000011941,ENSFCAG00000031266,ENSFCAG00000012795,ENSFCAG00000004503,ENSFCAG00000000317,ENSFCAG00000002664,ENSFCAG00000001748,ENSFCAG00000025653,ENSFCAG00000041275,ENSFCAG00000000080,…
GO:BP	appendage morphogenesis	GO:0035107	0.0437532	1.35899	132	555	14	14276	ENSFCAG00000033553,ENSFCAG00000034933,ENSFCAG00000026867,ENSFCAG00000005027,ENSFCAG00000037811,ENSFCAG00000043446,ENSFCAG00000027039,ENSFCAG00000046410,ENSFCAG00000027896,ENSFCAG00000005782,ENSFCAG00000024654,ENSFCAG00000029706,ENSFCAG00000015482,ENSFCAG00000046271
GO:BP	female pregnancy	GO:0007565	0.0437532	1.35899	75	555	10	14276	ENSFCAG00000010530,ENSFCAG00000030923,ENSFCAG00000027537,ENSFCAG00000021980,ENSFCAG00000001230,ENSFCAG00000029941,ENSFCAG00000027896,ENSFCAG00000025234,ENSFCAG00000024594,ENSFCAG00000040613
GO:BP	signaling	GO:0023052	0.0439983	1.35656	4783	555	222	14276	ENSFCAG00000023546,ENSFCAG00000028685,ENSFCAG00000033553,ENSFCAG00000012878,ENSFCAG00000043283,ENSFCAG00000004831,ENSFCAG00000012553,ENSFCAG00000001665,ENSFCAG00000013482,ENSFCAG00000011941,ENSFCAG00000004503,ENSFCAG00000000317,ENSFCAG00000018843,ENSFCAG00000013500,ENSFCAG00000000080,ENSFCAG00000038541,ENSFCAG00000004893,ENSFCAG00000003923,ENSFCAG00000030382,ENSFCAG00000028536,ENSFCAG00000033714,…
GO:BP	animal organ development	GO:0048513	0.0439983	1.35656	2342	555	120	14276	ENSFCAG00000042818,ENSFCAG00000023546,ENSFCAG00000033553,ENSFCAG00000034933,ENSFCAG00000012878,ENSFCAG00000004245,ENSFCAG00000030762,ENSFCAG00000004831,ENSFCAG00000001665,ENSFCAG00000009839,ENSFCAG00000004503,ENSFCAG00000040814,ENSFCAG00000004893,ENSFCAG00000028536,ENSFCAG00000033714,ENSFCAG00000039949,ENSFCAG00000008546,ENSFCAG00000014103,ENSFCAG00000030466,ENSFCAG00000001831,ENSFCAG00000045824,…
GO:BP	negative regulation of cell differentiation	GO:0045596	0.045219	1.34468	485	555	34	14276	ENSFCAG00000040814,ENSFCAG00000009897,ENSFCAG00000002378,ENSFCAG00000001719,ENSFCAG00000014246,ENSFCAG00000006415,ENSFCAG00000000059,ENSFCAG00000009802,ENSFCAG00000031493,ENSFCAG00000007838,ENSFCAG00000006154,ENSFCAG00000037811,ENSFCAG00000002156,ENSFCAG00000021980,ENSFCAG00000011470,ENSFCAG00000024249,ENSFCAG00000036549,ENSFCAG00000046410,ENSFCAG00000001230,ENSFCAG00000015580,ENSFCAG00000025234,…
GO:BP	epithelium development	GO:0060429	0.0456883	1.3402	825	555	51	14276	ENSFCAG00000000754,ENSFCAG00000033553,ENSFCAG00000034933,ENSFCAG00000004831,ENSFCAG00000030382,ENSFCAG00000033190,ENSFCAG00000026867,ENSFCAG00000010530,ENSFCAG00000026503,ENSFCAG00000044465,ENSFCAG00000028518,ENSFCAG00000007627,ENSFCAG00000007788,ENSFCAG00000009268,ENSFCAG00000013445,ENSFCAG00000015148,ENSFCAG00000030557,ENSFCAG00000005027,ENSFCAG00000028979,ENSFCAG00000021980,ENSFCAG00000035477,…

## Sheet: PANTHER
miR-222 GO:MF
GO molecular function complete	Felis catus - REFLIST (20447)	upload_1 (335)	upload_1 (expected)	upload_1 (over/under)	upload_1 (fold Enrichment)	upload_1 (raw P-value)	upload_1 (FDR)
catalytic activity (GO:0003824)	4634	109	75.92	+	1.44	4.31e-05	0.0398
binding (GO:0005488)	8614	189	141.13	+	1.34	2.46e-07	0.000909
molecular_function (GO:0003674)	12415	247	203.41	+	1.21	7.96e-07	0.00147
Unclassified (UNCLASSIFIED)	8032	88	131.59	-	0.67	7.96e-07	0.00098
miR-222 GO:CC
GO cellular component complete	Felis catus - REFLIST (20447)	upload_1 (335)	upload_1 (expected)	upload_1 (over/under)	upload_1 (fold Enrichment)	upload_1 (raw P-value)	upload_1 (FDR)
cytoplasmic part (GO:0044444)	4836	114	79.23	+	1.44	2.38e-05	0.00365
cytoplasm (GO:0005737)	5934	136	97.22	+	1.4	8.76e-06	0.00212
membrane-bounded organelle (GO:0043227)	6397	144	104.81	+	1.37	8.02e-06	0.00226
intracellular (GO:0005622)	8397	189	137.57	+	1.37	2.43e-08	4.12e-05
intracellular part (GO:0044424)	8397	189	137.57	+	1.37	2.43e-08	2.06e-05
intracellular membrane-bounded organelle (GO:0043231)	6008	134	98.43	+	1.36	3.82e-05	0.00539
intracellular organelle (GO:0043229)	7269	162	119.09	+	1.36	2.16e-06	0.00122
organelle (GO:0043226)	7455	164	122.14	+	1.34	4.31e-06	0.00182
cell part (GO:0044464)	10174	208	166.69	+	1.25	7.51e-06	0.00254
cell (GO:0005623)	10313	210	168.97	+	1.24	9.57e-06	0.00202
cellular_component (GO:0005575)	12797	247	209.66	+	1.18	2.3e-05	0.00432
Unclassified (UNCLASSIFIED)	7650	88	125.34	-	0.7	2.3e-05	0.00389
miR-222 GO:BP
GO biological process complete	Felis catus - REFLIST (20447)	upload_1 (335)	upload_1 (expected)	upload_1 (over/under)	upload_1 (fold Enrichment)	upload_1 (raw P-value)	upload_1 (FDR)
Unclassified (UNCLASSIFIED)	7374	72	120.81	-	0.6	1.39e-08	9.23e-05
biological_process (GO:0008150)	13073	263	214.19	+	1.23	1.39e-08	0.000185
cellular process (GO:0009987)	9558	206	156.6	+	1.32	9.69e-08	0.000429
heterocycle metabolic process (GO:0046483)	1562	49	25.59	+	1.91	1.8e-05	0.0479
cellular aromatic compound metabolic process (GO:0006725)	1584	49	25.95	+	1.89	2.2e-05	0.0487
nucleobase-containing compound metabolic process (GO:0006139)	1469	47	24.07	+	1.95	1.66e-05	0.0552
miR-322 GO:MF
GO molecular function complete	Felis catus - REFLIST (20447)	upload_1 (931)	upload_1 (expected)	upload_1 (over/under)	upload_1 (fold Enrichment)	upload_1 (raw P-value)	upload_1 (FDR)
neurotransmitter receptor activity (GO:0030594)	83	14	3.78	+	3.7	7.73e-05	0.019
ubiquitin-protein transferase activity (GO:0004842)	220	24	10.02	+	2.4	0.000196	0.0329
phosphotransferase activity, alcohol group as acceptor (GO:0016773)	621	59	28.28	+	2.09	4.69e-07	0.000173
protein kinase activity (GO:0004672)	531	50	24.18	+	2.07	4.42e-06	0.00126
kinase activity (GO:0016301)	678	62	30.87	+	2.01	8.39e-07	0.000282
transferase activity, transferring phosphorus-containing groups (GO:0016772)	795	72	36.2	+	1.99	1.49e-07	6.88e-05
ion transmembrane transporter activity (GO:0015075)	659	54	30.01	+	1.8	7.74e-05	0.0179
inorganic molecular entity transmembrane transporter activity (GO:0015318)	624	50	28.41	+	1.76	0.000241	0.0387
enzyme binding (GO:0019899)	1242	98	56.55	+	1.73	3.73e-07	0.000153
transferase activity (GO:0016740)	1712	131	77.95	+	1.68	1.61e-08	9.93e-06
catalytic activity, acting on a protein (GO:0140096)	1702	130	77.5	+	1.68	2.08e-08	1.1e-05
drug binding (GO:0008144)	1338	101	60.92	+	1.66	1.76e-06	0.00054
transporter activity (GO:0005215)	955	72	43.48	+	1.66	7.91e-05	0.0172
transmembrane transporter activity (GO:0022857)	860	64	39.16	+	1.63	0.000262	0.0403
protein binding (GO:0005515)	4134	276	188.23	+	1.47	2.75e-11	2.03e-08
small molecule binding (GO:0036094)	1963	127	89.38	+	1.42	0.000118	0.0229
anion binding (GO:0043168)	2081	132	94.75	+	1.39	0.000176	0.0309
catalytic activity (GO:0003824)	4634	272	211	+	1.29	6.39e-06	0.00169
ion binding (GO:0043167)	4045	235	184.18	+	1.28	8.02e-05	0.0165
binding (GO:0005488)	8614	500	392.22	+	1.27	4.02e-12	1.49e-08
molecular_function (GO:0003674)	12415	668	565.28	+	1.18	6.46e-12	7.95e-09
Unclassified (UNCLASSIFIED)	8032	263	365.72	-	0.72	6.46e-12	5.96e-09
receptor ligand activity (GO:0048018)	299	2	13.61	-	0.15	0.000293	0.0432
structural constituent of ribosome (GO:0003735)	272	1	12.38	-	0.08	0.000132	0.0243
olfactory receptor activity (GO:0004984)	593	0	27	-	< 0.01	4.96e-12	9.16e-09
miR-322 GO:CC
GO cellular component complete	Felis catus - REFLIST (20447)	upload_1 (931)	upload_1 (expected)	upload_1 (over/under)	upload_1 (fold Enrichment)	upload_1 (raw P-value)	upload_1 (FDR)
receptor complex (GO:0043235)	191	25	8.7	+	2.87	8.69e-06	0.000668
transferase complex, transferring phosphorus-containing groups (GO:0061695)	135	16	6.15	+	2.6	0.000923	0.0446
nuclear envelope (GO:0005635)	212	22	9.65	+	2.28	0.000936	0.044
synapse (GO:0045202)	498	45	22.68	+	1.98	4.01e-05	0.00271
synapse part (GO:0044456)	364	32	16.57	+	1.93	0.00104	0.0477
transferase complex (GO:1990234)	442	38	20.13	+	1.89	0.000393	0.0229
integral component of plasma membrane (GO:0005887)	537	44	24.45	+	1.8	0.0004	0.0218
intrinsic component of plasma membrane (GO:0031226)	578	46	26.32	+	1.75	0.000632	0.0324
neuron part (GO:0097458)	637	50	29	+	1.72	0.000396	0.0223
plasma membrane part (GO:0044459)	1167	86	53.14	+	1.62	3.11e-05	0.00219
cytosol (GO:0005829)	1891	138	86.1	+	1.6	1.19e-07	1.44e-05
nucleoplasm (GO:0005654)	1779	126	81	+	1.56	1.72e-06	0.000162
organelle membrane (GO:0031090)	1203	85	54.78	+	1.55	0.000132	0.00796
cytoskeleton (GO:0005856)	1168	80	53.18	+	1.5	0.000566	0.0299
nuclear lumen (GO:0031981)	2316	158	105.45	+	1.5	5.81e-07	6.14e-05
nuclear part (GO:0044428)	2601	176	118.43	+	1.49	1.91e-07	2.16e-05
organelle lumen (GO:0043233)	2515	165	114.51	+	1.44	3e-06	0.000267
intracellular organelle lumen (GO:0070013)	2515	165	114.51	+	1.44	3e-06	0.000254
membrane-enclosed lumen (GO:0031974)	2515	165	114.51	+	1.44	3e-06	0.000242
nucleus (GO:0005634)	4073	262	185.45	+	1.41	4.67e-09	7.89e-07
endomembrane system (GO:0012505)	1901	119	86.56	+	1.37	0.0007	0.0348
organelle part (GO:0044422)	4766	297	217.01	+	1.37	6.06e-09	9.31e-07
intracellular organelle part (GO:0044446)	4592	284	209.08	+	1.36	3.21e-08	4.53e-06
membrane-bounded organelle (GO:0043227)	6397	387	291.27	+	1.33	1.26e-10	2.36e-08
protein-containing complex (GO:0032991)	3352	202	152.62	+	1.32	4.04e-05	0.00263
intracellular (GO:0005622)	8397	505	382.34	+	1.32	2.98e-15	1.68e-12
intracellular part (GO:0044424)	8397	505	382.34	+	1.32	2.98e-15	1.26e-12
organelle (GO:0043226)	7455	447	339.44	+	1.32	1.95e-12	4.71e-10
intracellular non-membrane-bounded organelle (GO:0043232)	2562	152	116.65	+	1.3	0.00104	0.0465
non-membrane-bounded organelle (GO:0043228)	2563	152	116.7	+	1.3	0.00105	0.0454
intracellular organelle (GO:0043229)	7269	429	330.97	+	1.3	1.17e-10	2.47e-08
intracellular membrane-bounded organelle (GO:0043231)	6008	354	273.56	+	1.29	3.54e-08	4.61e-06
cell periphery (GO:0071944)	2866	167	130.5	+	1.28	0.00108	0.0457
cell part (GO:0044464)	10174	592	463.25	+	1.28	1.14e-16	9.66e-14
cell (GO:0005623)	10313	599	469.58	+	1.28	6.51e-17	1.1e-13
cytoplasmic part (GO:0044444)	4836	280	220.19	+	1.27	1.25e-05	0.000921
cytoplasm (GO:0005737)	5934	342	270.19	+	1.27	7.75e-07	7.71e-05
membrane (GO:0016020)	6330	345	288.22	+	1.2	0.000108	0.00674
cellular_component (GO:0005575)	12797	697	582.68	+	1.2	7.07e-15	2.39e-12
Unclassified (UNCLASSIFIED)	7650	234	348.32	-	0.67	7.07e-15	1.99e-12
miR-322 GO:BP
GO biological process complete	Felis catus - REFLIST (20447)	upload_1 (931)	upload_1 (expected)	upload_1 (over/under)	upload_1 (fold Enrichment)	upload_1 (raw P-value)	upload_1 (FDR)
biological_process (GO:0008150)	13073	719	595.24	+	1.21	1.13e-17	7.5e-14
Unclassified (UNCLASSIFIED)	7374	212	335.76	-	0.63	1.13e-17	1.5e-13
cellular component organization or biogenesis (GO:0071840)	2996	227	136.41	+	1.66	2.86e-14	9.5e-11
cellular component organization (GO:0016043)	2919	223	132.91	+	1.68	2.22e-14	9.86e-11
protein modification process (GO:0036211)	1898	158	86.42	+	1.83	1e-12	1.91e-09
localization (GO:0051179)	3063	225	139.47	+	1.61	8.17e-13	2.17e-09
cellular protein modification process (GO:0006464)	1898	158	86.42	+	1.83	1e-12	2.22e-09
detection of chemical stimulus involved in sensory perception (GO:0050907)	607	0	27.64	-	< 0.01	2.12e-12	3.52e-09
detection of chemical stimulus involved in sensory perception of smell (GO:0050911)	593	0	27	-	< 0.01	4.96e-12	7.33e-09
macromolecule modification (GO:0043412)	2030	161	92.43	+	1.74	2.17e-11	2.88e-08
regulation of biological process (GO:0050789)	7598	447	345.95	+	1.29	4.3e-11	4.76e-08
detection of chemical stimulus (GO:0009593)	619	1	28.18	-	0.04	3.95e-11	4.78e-08
cellular process (GO:0009987)	9558	538	435.2	+	1.24	5.11e-11	5.23e-08
establishment of localization (GO:0051234)	2442	181	111.19	+	1.63	1.77e-10	1.57e-07
biological regulation (GO:0065007)	8062	466	367.08	+	1.27	1.7e-10	1.61e-07
detection of stimulus involved in sensory perception (GO:0050906)	635	2	28.91	-	0.07	3.15e-10	2.61e-07
negative regulation of cellular process (GO:0048523)	2571	185	117.06	+	1.58	8.58e-10	6.71e-07
regulation of cellular process (GO:0050794)	7143	416	325.24	+	1.28	2.28e-09	1.68e-06
transport (GO:0006810)	2346	171	106.82	+	1.6	2.41e-09	1.69e-06
detection of stimulus (GO:0051606)	685	4	31.19	-	0.13	3.14e-09	2.09e-06
negative regulation of biological process (GO:0048519)	2868	198	130.59	+	1.52	4.65e-09	2.95e-06
anatomical structure development (GO:0048856)	2607	183	118.7	+	1.54	6.74e-09	4.07e-06
cellular developmental process (GO:0048869)	1753	134	79.82	+	1.68	1.14e-08	6.58e-06
divalent inorganic cation transport (GO:0072511)	186	30	8.47	+	3.54	1.99e-08	9.82e-06
cellular protein metabolic process (GO:0044267)	2448	172	111.46	+	1.54	2.17e-08	9.97e-06
cellular localization (GO:0051641)	1155	98	52.59	+	1.86	1.8e-08	9.98e-06
system development (GO:0048731)	2131	155	97.03	+	1.6	1.89e-08	1e-05
developmental process (GO:0032502)	2720	187	123.85	+	1.51	2.14e-08	1.01e-05
divalent metal ion transport (GO:0070838)	186	30	8.47	+	3.54	1.99e-08	1.02e-05
sensory perception of smell (GO:0007608)	610	4	27.77	-	0.14	5.65e-08	2.5e-05
organelle organization (GO:0006996)	1801	134	82	+	1.63	6.26e-08	2.68e-05
regulation of localization (GO:0032879)	1481	115	67.43	+	1.71	6.94e-08	2.88e-05
sensory perception of chemical stimulus (GO:0007606)	644	5	29.32	-	0.17	7.98e-08	3.21e-05
cellular macromolecule metabolic process (GO:0044260)	3202	209	145.79	+	1.43	1.27e-07	4.96e-05
anatomical structure morphogenesis (GO:0009653)	1159	95	52.77	+	1.8	1.44e-07	5.49e-05
organonitrogen compound metabolic process (GO:1901564)	3519	225	160.23	+	1.4	1.77e-07	6.37e-05
protein metabolic process (GO:0019538)	2952	195	134.41	+	1.45	1.75e-07	6.47e-05
cellular component morphogenesis (GO:0032989)	390	44	17.76	+	2.48	2.59e-07	9.07e-05
cell differentiation (GO:0030154)	1690	125	76.95	+	1.62	2.67e-07	9.11e-05
regulation of response to stimulus (GO:0048583)	2296	158	104.54	+	1.51	3.94e-07	0.000131
animal organ development (GO:0048513)	1571	117	71.53	+	1.64	4.17e-07	0.000135
multicellular organism development (GO:0007275)	2371	162	107.96	+	1.5	4.33e-07	0.000137
protein modification by small protein conjugation or removal (GO:0070647)	495	50	22.54	+	2.22	6.7e-07	0.000207
regulation of metabolic process (GO:0019222)	3836	238	174.66	+	1.36	6.88e-07	0.000208
regulation of cell communication (GO:0010646)	2032	142	92.52	+	1.53	7.13e-07	0.000211
regulation of signaling (GO:0023051)	2047	143	93.2	+	1.53	7.63e-07	0.000221
positive regulation of biological process (GO:0048518)	3344	212	152.26	+	1.39	8.58e-07	0.000243
regulation of macromolecule metabolic process (GO:0060255)	3569	223	162.5	+	1.37	1.04e-06	0.000288
calcium ion transport (GO:0006816)	158	24	7.19	+	3.34	1.33e-06	0.00036
regulation of transcription, DNA-templated (GO:0006355)	2010	139	91.52	+	1.52	1.93e-06	0.000503
ion transmembrane transport (GO:0034220)	676	61	30.78	+	1.98	2e-06	0.000512
regulation of gene expression (GO:0010468)	2531	167	115.24	+	1.45	1.92e-06	0.000512
protein phosphorylation (GO:0006468)	634	58	28.87	+	2.01	2.46e-06	0.000617
macromolecule metabolic process (GO:0043170)	4069	246	185.27	+	1.33	2.76e-06	0.000667
regulation of cellular metabolic process (GO:0031323)	3603	222	164.05	+	1.35	2.76e-06	0.000679
nitrogen compound metabolic process (GO:0006807)	4530	269	206.26	+	1.3	3.01e-06	0.000703
negative regulation of macromolecule metabolic process (GO:0010605)	1407	104	64.06	+	1.62	3e-06	0.000713
nervous system development (GO:0007399)	1065	84	48.49	+	1.73	3.36e-06	0.00077
ion transport (GO:0006811)	970	78	44.17	+	1.77	3.82e-06	0.00086
regulation of nucleic acid-templated transcription (GO:1903506)	2067	140	94.12	+	1.49	4.45e-06	0.000985
regulation of RNA biosynthetic process (GO:2001141)	2070	140	94.25	+	1.49	4.56e-06	0.000995
phosphorylation (GO:0016310)	832	69	37.88	+	1.82	5.39e-06	0.00115
regulation of nitrogen compound metabolic process (GO:0051171)	3401	210	154.86	+	1.36	5.9e-06	0.00124
sensory perception (GO:0007600)	860	14	39.16	-	0.36	6.15e-06	0.00128
regulation of cellular component organization (GO:0051128)	1293	96	58.87	+	1.63	6.36e-06	0.0013
regulation of primary metabolic process (GO:0080090)	3482	213	158.54	+	1.34	8.84e-06	0.00178
protein modification by small protein conjugation (GO:0032446)	405	41	18.44	+	2.22	9.18e-06	0.00182
regulation of biological quality (GO:0065008)	2117	141	96.39	+	1.46	9.36e-06	0.00183
positive regulation of cellular process (GO:0048522)	2931	184	133.46	+	1.38	9.57e-06	0.00184
cell morphogenesis (GO:0000902)	342	36	15.57	+	2.31	1.08e-05	0.00201
regulation of transcription by RNA polymerase II (GO:0006357)	1114	85	50.72	+	1.68	1.07e-05	0.00202
ubiquitin-dependent protein catabolic process (GO:0006511)	259	30	11.79	+	2.54	1.27e-05	0.00235
cell surface receptor signaling pathway (GO:0007166)	1021	79	46.49	+	1.7	1.31e-05	0.00238
regulation of RNA metabolic process (GO:0051252)	2210	145	100.63	+	1.44	1.38e-05	0.00248
regulation of cellular response to growth factor stimulus (GO:0090287)	148	21	6.74	+	3.12	1.52e-05	0.0027
regulation of signal transduction (GO:0009966)	1840	125	83.78	+	1.49	1.62e-05	0.00283
modification-dependent protein catabolic process (GO:0019941)	265	30	12.07	+	2.49	1.73e-05	0.00299
negative regulation of gene expression (GO:0010629)	867	69	39.48	+	1.75	1.81e-05	0.00308
metal ion transport (GO:0030001)	435	42	19.81	+	2.12	1.87e-05	0.00315
regulation of biosynthetic process (GO:0009889)	2454	157	111.74	+	1.41	2.07e-05	0.00344
modification-dependent macromolecule catabolic process (GO:0043632)	269	30	12.25	+	2.45	2.16e-05	0.00354
nucleus organization (GO:0006997)	73	14	3.32	+	4.21	2.24e-05	0.00363
cell development (GO:0048468)	824	66	37.52	+	1.76	2.37e-05	0.00379
negative regulation of metabolic process (GO:0009892)	1546	108	70.39	+	1.53	2.4e-05	0.0038
negative regulation of nitrogen compound metabolic process (GO:0051172)	1265	92	57.6	+	1.6	2.46e-05	0.00384
phosphate-containing compound metabolic process (GO:0006796)	1361	97	61.97	+	1.57	2.61e-05	0.00404
regulation of cellular macromolecule biosynthetic process (GO:2000112)	2258	146	102.81	+	1.42	2.66e-05	0.00406
protein ubiquitination (GO:0016567)	382	38	17.39	+	2.18	2.73e-05	0.00413
regulation of nucleobase-containing compound metabolic process (GO:0019219)	2336	150	106.36	+	1.41	2.78e-05	0.00415
primary metabolic process (GO:0044238)	4932	282	224.57	+	1.26	2.88e-05	0.00426
regulation of macromolecule biosynthetic process (GO:0010556)	2355	151	107.23	+	1.41	2.93e-05	0.00428
macromolecule localization (GO:0033036)	1165	86	53.05	+	1.62	3.07e-05	0.00443
cellular protein localization (GO:0034613)	731	60	33.28	+	1.8	3.68e-05	0.00526
cellular macromolecule localization (GO:0070727)	734	60	33.42	+	1.8	3.81e-05	0.00528
neurogenesis (GO:0022008)	801	64	36.47	+	1.75	3.79e-05	0.00531
phosphorus metabolic process (GO:0006793)	1374	97	62.56	+	1.55	3.77e-05	0.00534
regulation of growth (GO:0040008)	332	34	15.12	+	2.25	4.09e-05	0.0056
proteolysis involved in cellular protein catabolic process (GO:0051603)	308	32	14.02	+	2.28	4.25e-05	0.0057
negative regulation of cellular metabolic process (GO:0031324)	1395	98	63.52	+	1.54	4.23e-05	0.00574
cellular metabolic process (GO:0044237)	4847	276	220.7	+	1.25	5.12e-05	0.00681
regulation of multicellular organismal process (GO:0051239)	1714	115	78.04	+	1.47	5.62e-05	0.00733
regulation of cellular biosynthetic process (GO:0031326)	2420	153	110.19	+	1.39	5.59e-05	0.00736
negative regulation of response to stimulus (GO:0048585)	880	68	40.07	+	1.7	5.8e-05	0.00748
regulation of multicellular organismal development (GO:2000026)	1089	80	49.58	+	1.61	6.2e-05	0.00793
transmembrane transport (GO:0055085)	969	73	44.12	+	1.65	6.41e-05	0.00812
inorganic ion transmembrane transport (GO:0098660)	474	43	21.58	+	1.99	6.66e-05	0.00836
proteasome-mediated ubiquitin-dependent protein catabolic process (GO:0043161)	117	17	5.33	+	3.19	7.4e-05	0.00919
organic substance metabolic process (GO:0071704)	5203	292	236.9	+	1.23	7.65e-05	0.00933
regulation of developmental process (GO:0050793)	1400	97	63.75	+	1.52	7.64e-05	0.0094
intracellular signal transduction (GO:0035556)	802	63	36.52	+	1.73	7.92e-05	0.00958
cellular component assembly (GO:0022607)	1220	87	55.55	+	1.57	8.18e-05	0.00979
generation of neurons (GO:0048699)	737	59	33.56	+	1.76	8.44e-05	0.01
establishment of localization in cell (GO:0051649)	809	63	36.84	+	1.71	8.57e-05	0.0101
peptidyl-amino acid modification (GO:0018193)	548	47	24.95	+	1.88	8.95e-05	0.0104
negative regulation of signal transduction (GO:0009968)	678	55	30.87	+	1.78	9.4e-05	0.0109
negative regulation of cell communication (GO:0010648)	714	57	32.51	+	1.75	9.8e-05	0.0112
cellular protein catabolic process (GO:0044257)	322	32	14.66	+	2.18	0.000102	0.0116
negative regulation of signaling (GO:0023057)	717	57	32.65	+	1.75	0.000104	0.0117
regulation of transport (GO:0051049)	924	69	42.07	+	1.64	0.000122	0.0136
regulation of Wnt signaling pathway (GO:0030111)	161	20	7.33	+	2.73	0.000128	0.0139
protein polyubiquitination (GO:0000209)	99	15	4.51	+	3.33	0.000128	0.014
protein localization (GO:0008104)	973	72	44.3	+	1.63	0.000126	0.014
regulation of neurotransmitter transport (GO:0051588)	66	12	3.01	+	3.99	0.000133	0.0144
cellular component biogenesis (GO:0044085)	1308	91	59.56	+	1.53	0.000137	0.0147
mitotic nuclear division (GO:0140014)	89	14	4.05	+	3.45	0.000149	0.0159
metabolic process (GO:0008152)	5763	316	262.4	+	1.2	0.000174	0.0183
proteasomal protein catabolic process (GO:0010498)	140	18	6.37	+	2.82	0.000186	0.0195
anatomical structure formation involved in morphogenesis (GO:0048646)	484	42	22.04	+	1.91	0.000193	0.02
positive regulation of molecular function (GO:0044093)	956	70	43.53	+	1.61	0.000209	0.0215
cation transport (GO:0006812)	620	50	28.23	+	1.77	0.000225	0.023
regulation of vesicle-mediated transport (GO:0060627)	251	26	11.43	+	2.27	0.000263	0.0265
cellular response to stimulus (GO:0051716)	3924	225	178.67	+	1.26	0.000263	0.0267
chromosome organization (GO:0051276)	571	47	26	+	1.81	0.000273	0.0273
calcium ion transmembrane transport (GO:0070588)	121	16	5.51	+	2.9	0.000314	0.0306
protein catabolic process (GO:0030163)	345	32	15.71	+	2.04	0.00031	0.0308
positive regulation of cell communication (GO:0010647)	883	65	40.21	+	1.62	0.000312	0.0308
positive regulation of signaling (GO:0023056)	887	65	40.39	+	1.61	0.000327	0.0317
somite development (GO:0061053)	53	10	2.41	+	4.14	0.000367	0.0353
heart development (GO:0007507)	288	28	13.11	+	2.14	0.000399	0.0381
establishment of protein localization (GO:0045184)	642	50	29.23	+	1.71	0.000432	0.0411
cytoskeleton organization (GO:0007010)	620	49	28.23	+	1.74	0.00047	0.0443
positive regulation of developmental process (GO:0051094)	739	56	33.65	+	1.66	0.000501	0.0469
positive regulation of growth (GO:0045927)	140	17	6.37	+	2.67	0.000505	0.047
organic substance transport (GO:0071702)	1001	71	45.58	+	1.56	0.000511	0.0472
positive regulation of multicellular organismal process (GO:0051240)	955	68	43.48	+	1.56	0.000519	0.0476
cell communication (GO:0007154)	3158	184	143.79	+	1.28	0.000533	0.0486
tissue development (GO:0009888)	870	63	39.61	+	1.59	0.00054	0.0488
negative regulation of proteasomal protein catabolic process (GO:1901799)	36	8	1.64	+	4.88	0.000551	0.0495
miR-361 GO:MF
GO molecular function complete	Felis catus - REFLIST (20447)	upload_1 (932)	upload_1 (expected)	upload_1 (over/under)	upload_1 (fold Enrichment)	upload_1 (raw P-value)	upload_1 (FDR)
histone acetyltransferase activity (GO:0004402)	37	10	1.69	+	5.93	2.81e-05	0.00865
peptide-lysine-N-acetyltransferase activity (GO:0061733)	39	10	1.78	+	5.63	4.13e-05	0.0109
peptide N-acetyltransferase activity (GO:0034212)	41	10	1.87	+	5.35	5.93e-05	0.0137
N-acyltransferase activity (GO:0016410)	63	12	2.87	+	4.18	9.1e-05	0.0187
transferase activity, transferring acyl groups (GO:0016746)	181	22	8.25	+	2.67	8.15e-05	0.0177
protein kinase activity (GO:0004672)	531	47	24.2	+	1.94	4.47e-05	0.011
phosphotransferase activity, alcohol group as acceptor (GO:0016773)	621	54	28.31	+	1.91	1.97e-05	0.00726
transferase activity, transferring phosphorus-containing groups (GO:0016772)	795	69	36.24	+	1.9	1.41e-06	0.00065
kinase activity (GO:0016301)	678	57	30.9	+	1.84	2.87e-05	0.00815
enzyme binding (GO:0019899)	1242	91	56.61	+	1.61	2.12e-05	0.00711
transferase activity (GO:0016740)	1712	124	78.04	+	1.59	8.22e-07	0.000434
catalytic activity, acting on a protein (GO:0140096)	1702	120	77.58	+	1.55	4.6e-06	0.00189
protein binding (GO:0005515)	4134	256	188.43	+	1.36	2.5e-07	0.000185
catalytic activity (GO:0003824)	4634	278	211.22	+	1.32	7.52e-07	0.000463
binding (GO:0005488)	8614	491	392.64	+	1.25	2.63e-10	2.43e-07
molecular_function (GO:0003674)	12415	673	565.89	+	1.19	7.08e-13	2.62e-09
Unclassified (UNCLASSIFIED)	8032	259	366.11	-	0.71	7.08e-13	1.31e-09
G protein-coupled receptor activity (GO:0004930)	943	20	42.98	-	0.47	0.000136	0.0264
olfactory receptor activity (GO:0004984)	593	0	27.03	-	< 0.01	5.02e-12	6.18e-09
miR-361 GO:CC
GO cellular component complete	Felis catus - REFLIST (20447)	upload_1 (932)	upload_1 (expected)	upload_1 (over/under)	upload_1 (fold Enrichment)	upload_1 (raw P-value)	upload_1 (FDR)
nucleoplasm (GO:0005654)	1779	124	81.09	+	1.53	5.33e-06	0.000644
nuclear lumen (GO:0031981)	2316	150	105.57	+	1.42	2.04e-05	0.00216
nuclear part (GO:0044428)	2601	167	118.56	+	1.41	1.06e-05	0.00119
nucleus (GO:0005634)	4073	259	185.65	+	1.4	1.68e-08	2.58e-06
organelle lumen (GO:0043233)	2515	159	114.64	+	1.39	3.9e-05	0.00388
intracellular organelle lumen (GO:0070013)	2515	159	114.64	+	1.39	3.9e-05	0.00367
membrane-enclosed lumen (GO:0031974)	2515	159	114.64	+	1.39	3.9e-05	0.00347
membrane-bounded organelle (GO:0043227)	6397	401	291.58	+	1.38	2.2e-13	1.24e-10
intracellular membrane-bounded organelle (GO:0043231)	6008	366	273.85	+	1.34	3.31e-10	5.59e-08
organelle (GO:0043226)	7455	444	339.81	+	1.31	1.1e-11	2.32e-09
intracellular organelle part (GO:0044446)	4592	273	209.31	+	1.3	2.3e-06	0.0003
organelle part (GO:0044422)	4766	283	217.24	+	1.3	1.42e-06	0.0002
intracellular organelle (GO:0043229)	7269	430	331.33	+	1.3	9.4e-11	1.77e-08
intracellular (GO:0005622)	8397	495	382.75	+	1.29	4.76e-13	2.01e-10
intracellular part (GO:0044424)	8397	495	382.75	+	1.29	4.76e-13	1.61e-10
cell part (GO:0044464)	10174	575	463.74	+	1.24	1e-12	2.42e-10
cell (GO:0005623)	10313	581	470.08	+	1.24	1e-12	2.83e-10
cytoplasm (GO:0005737)	5934	329	270.48	+	1.22	5.07e-05	0.00429
cellular_component (GO:0005575)	12797	702	583.3	+	1.2	5.69e-16	4.81e-13
membrane (GO:0016020)	6330	339	288.53	+	1.17	0.000588	0.0473
Unclassified (UNCLASSIFIED)	7650	230	348.7	-	0.66	5.69e-16	9.62e-13
miR-361 GO:BP
GO biological process complete	Felis catus - REFLIST (20447)	upload_1 (932)	upload_1 (expected)	upload_1 (over/under)	upload_1 (fold Enrichment)	upload_1 (raw P-value)	upload_1 (FDR)
biological_process (GO:0008150)	13073	731	595.88	+	1.23	6.48e-21	4.3e-17
Unclassified (UNCLASSIFIED)	7374	201	336.12	-	0.6	6.48e-21	8.61e-17
biological regulation (GO:0065007)	8062	491	367.48	+	1.34	1.55e-15	5.17e-12
regulation of biological process (GO:0050789)	7598	469	346.33	+	1.35	1.39e-15	6.17e-12
regulation of cellular process (GO:0050794)	7143	443	325.59	+	1.36	1.31e-14	3.49e-11
detection of chemical stimulus involved in sensory perception (GO:0050907)	607	0	27.67	-	< 0.01	2.13e-12	4.71e-09
detection of chemical stimulus involved in sensory perception of smell (GO:0050911)	593	0	27.03	-	< 0.01	5.02e-12	9.53e-09
sensory perception of smell (GO:0007608)	610	1	27.8	-	0.04	5.89e-11	9.79e-08
protein modification process (GO:0036211)	1898	149	86.51	+	1.72	2.73e-10	3.3e-07
developmental process (GO:0032502)	2720	196	123.98	+	1.58	2.37e-10	3.51e-07
cellular protein modification process (GO:0006464)	1898	149	86.51	+	1.72	2.73e-10	3.62e-07
system development (GO:0048731)	2131	162	97.13	+	1.67	3.61e-10	4e-07
regulation of metabolic process (GO:0019222)	3836	254	174.85	+	1.45	7.24e-10	6.87e-07
detection of chemical stimulus (GO:0009593)	619	2	28.21	-	0.07	7.1e-10	7.26e-07
positive regulation of biological process (GO:0048518)	3344	227	152.42	+	1.49	1.11e-09	9.84e-07
sensory perception of chemical stimulus (GO:0007606)	644	3	29.35	-	0.1	1.84e-09	1.53e-06
anatomical structure development (GO:0048856)	2607	185	118.83	+	1.56	2.74e-09	1.92e-06
multicellular organism development (GO:0007275)	2371	172	108.07	+	1.59	2.91e-09	1.94e-06
detection of stimulus involved in sensory perception (GO:0050906)	635	3	28.94	-	0.1	2.67e-09	1.97e-06
positive regulation of cellular process (GO:0048522)	2931	203	133.6	+	1.52	2.66e-09	2.08e-06
macromolecule modification (GO:0043412)	2030	152	92.53	+	1.64	4.85e-09	3.07e-06
regulation of cellular metabolic process (GO:0031323)	3603	236	164.23	+	1.44	9.51e-09	5.75e-06
regulation of macromolecule metabolic process (GO:0060255)	3569	234	162.68	+	1.44	1.08e-08	6.25e-06
regulation of primary metabolic process (GO:0080090)	3482	229	158.71	+	1.44	1.31e-08	7.28e-06
regulation of nitrogen compound metabolic process (GO:0051171)	3401	224	155.02	+	1.44	1.66e-08	8.49e-06
cellular process (GO:0009987)	9558	524	435.67	+	1.2	1.61e-08	8.55e-06
regulation of signaling (GO:0023051)	2047	150	93.3	+	1.61	2.07e-08	1.02e-05
negative regulation of cellular process (GO:0048523)	2571	179	117.19	+	1.53	2.36e-08	1.12e-05
regulation of cell communication (GO:0010646)	2032	149	92.62	+	1.61	2.53e-08	1.16e-05
regulation of response to stimulus (GO:0048583)	2296	163	104.65	+	1.56	3.06e-08	1.36e-05
regulation of signal transduction (GO:0009966)	1840	137	83.87	+	1.63	4.42e-08	1.84e-05
cellular developmental process (GO:0048869)	1753	132	79.9	+	1.65	4.39e-08	1.88e-05
negative regulation of biological process (GO:0048519)	2868	192	130.73	+	1.47	9.72e-08	3.91e-05
cell differentiation (GO:0030154)	1690	127	77.03	+	1.65	1.02e-07	3.97e-05
regulation of cellular biosynthetic process (GO:0031326)	2420	167	110.31	+	1.51	1.41e-07	5.34e-05
regulation of biosynthetic process (GO:0009889)	2454	168	111.86	+	1.5	2.19e-07	8.1e-05
animal organ development (GO:0048513)	1571	118	71.61	+	1.65	2.93e-07	0.000105
positive regulation of cellular metabolic process (GO:0031325)	1826	132	83.23	+	1.59	3.74e-07	0.000131
establishment of localization (GO:0051234)	2442	165	111.31	+	1.48	6.14e-07	0.000209
positive regulation of metabolic process (GO:0009893)	1991	140	90.75	+	1.54	7.54e-07	0.000251
regulation of gene expression (GO:0010468)	2531	169	115.37	+	1.46	9.03e-07	0.000293
regulation of macromolecule biosynthetic process (GO:0010556)	2355	159	107.34	+	1.48	1.19e-06	0.000377
positive regulation of nitrogen compound metabolic process (GO:0051173)	1754	125	79.95	+	1.56	1.49e-06	0.000452
transport (GO:0006810)	2346	158	106.93	+	1.48	1.49e-06	0.000459
protein metabolic process (GO:0019538)	2952	190	134.56	+	1.41	1.63e-06	0.000482
cellular macromolecule metabolic process (GO:0044260)	3202	203	145.95	+	1.39	1.79e-06	0.000517
regulation of nucleic acid-templated transcription (GO:1903506)	2067	142	94.22	+	1.51	1.99e-06	0.000563
regulation of RNA biosynthetic process (GO:2001141)	2070	142	94.35	+	1.5	2.04e-06	0.000565
localization (GO:0051179)	3063	195	139.62	+	1.4	2.33e-06	0.000632
organonitrogen compound metabolic process (GO:1901564)	3519	218	160.4	+	1.36	2.78e-06	0.000738
cellular protein metabolic process (GO:0044267)	2448	162	111.58	+	1.45	2.95e-06	0.000769
positive regulation of macromolecule metabolic process (GO:0010604)	1854	129	84.51	+	1.53	3.47e-06	0.000888
regulation of cellular macromolecule biosynthetic process (GO:2000112)	2258	151	102.92	+	1.47	3.71e-06	0.000931
regulation of transcription, DNA-templated (GO:0006355)	2010	137	91.62	+	1.5	4.47e-06	0.0011
generation of neurons (GO:0048699)	737	63	33.59	+	1.88	5.53e-06	0.00134
animal organ morphogenesis (GO:0009887)	548	51	24.98	+	2.04	5.71e-06	0.00135
regulation of nucleobase-containing compound metabolic process (GO:0019219)	2336	154	106.48	+	1.45	6.55e-06	0.00153
detection of stimulus (GO:0051606)	685	9	31.22	-	0.29	6.81e-06	0.00153
cell surface receptor signaling pathway (GO:0007166)	1021	80	46.54	+	1.72	6.73e-06	0.00154
anatomical structure morphogenesis (GO:0009653)	1159	88	52.83	+	1.67	8.07e-06	0.00179
positive regulation of cellular biosynthetic process (GO:0031328)	1113	85	50.73	+	1.68	1.07e-05	0.00233
metabolic process (GO:0008152)	5763	326	262.68	+	1.24	1.15e-05	0.00243
regulation of multicellular organismal process (GO:0051239)	1714	119	78.13	+	1.52	1.14e-05	0.00244
protein modification by small protein conjugation or removal (GO:0070647)	495	46	22.56	+	2.04	1.55e-05	0.00318
cellular metabolic process (GO:0044237)	4847	280	220.93	+	1.27	1.54e-05	0.0032
positive regulation of biosynthetic process (GO:0009891)	1132	85	51.6	+	1.65	1.75e-05	0.00337
cellular component organization (GO:0016043)	2919	182	133.05	+	1.37	1.78e-05	0.00338
regulation of RNA metabolic process (GO:0051252)	2210	145	100.73	+	1.44	1.74e-05	0.0034
organic substance metabolic process (GO:0071704)	5203	297	237.16	+	1.25	1.73e-05	0.00344
primary metabolic process (GO:0044238)	4932	284	224.81	+	1.26	1.73e-05	0.00348
neurogenesis (GO:0022008)	801	65	36.51	+	1.78	1.88e-05	0.00351
phosphate-containing compound metabolic process (GO:0006796)	1361	98	62.04	+	1.58	1.91e-05	0.00352
nervous system development (GO:0007399)	1065	81	48.54	+	1.67	1.95e-05	0.00355
phosphorus metabolic process (GO:0006793)	1374	98	62.63	+	1.56	2.78e-05	0.00499
regulation of transcription by RNA polymerase II (GO:0006357)	1114	83	50.78	+	1.63	2.91e-05	0.00515
internal protein amino acid acetylation (GO:0006475)	86	15	3.92	+	3.83	3.12e-05	0.00545
protein acylation (GO:0043543)	120	18	5.47	+	3.29	3.2e-05	0.00545
skeletal system development (GO:0001501)	261	29	11.9	+	2.44	3.2e-05	0.00552
bone development (GO:0060348)	98	16	4.47	+	3.58	3.51e-05	0.00591
response to organic substance (GO:0010033)	1278	92	58.25	+	1.58	3.67e-05	0.00609
regulation of neuron differentiation (GO:0045664)	293	31	13.36	+	2.32	4.54e-05	0.00745
positive regulation of nucleobase-containing compound metabolic process (GO:0045935)	1065	79	48.54	+	1.63	5.24e-05	0.00849
histone modification (GO:0016570)	241	27	10.99	+	2.46	5.46e-05	0.00875
cellular component organization or biogenesis (GO:0071840)	2996	183	136.56	+	1.34	6.04e-05	0.00955
covalent chromatin modification (GO:0016569)	244	27	11.12	+	2.43	6.42e-05	0.01
regulation of nervous system development (GO:0051960)	446	41	20.33	+	2.02	6.55e-05	0.0101
positive regulation of macromolecule biosynthetic process (GO:0010557)	1075	79	49	+	1.61	7.68e-05	0.0117
internal peptidyl-lysine acetylation (GO:0018393)	83	14	3.78	+	3.7	7.82e-05	0.0118
organelle organization (GO:0006996)	1801	119	82.09	+	1.45	8.2e-05	0.0121
chromatin organization (GO:0006325)	360	35	16.41	+	2.13	8.36e-05	0.0122
regulation of neurogenesis (GO:0050767)	378	36	17.23	+	2.09	8.15e-05	0.0122
macromolecule metabolic process (GO:0043170)	4069	236	185.47	+	1.27	8.43e-05	0.0122
regulation of cellular component organization (GO:0051128)	1293	91	58.94	+	1.54	9.59e-05	0.0137
peptidyl-lysine acetylation (GO:0018394)	85	14	3.87	+	3.61	9.8e-05	0.0139
response to organonitrogen compound (GO:0010243)	366	35	16.68	+	2.1	0.0001	0.014
neuron differentiation (GO:0030182)	473	42	21.56	+	1.95	0.000107	0.0145
negative regulation of gene expression (GO:0010629)	867	66	39.52	+	1.67	0.000106	0.0145
protein acetylation (GO:0006473)	97	15	4.42	+	3.39	0.000105	0.0146
positive regulation of multicellular organismal process (GO:0051240)	955	71	43.53	+	1.63	0.000114	0.0152
tube development (GO:0035295)	476	42	21.7	+	1.94	0.000115	0.0153
respiratory tube development (GO:0030323)	110	16	5.01	+	3.19	0.000119	0.0157
chromosome organization (GO:0051276)	571	48	26.03	+	1.84	0.000124	0.0162
cellular response to organic cyclic compound (GO:0071407)	213	24	9.71	+	2.47	0.00014	0.0181
regulation of localization (GO:0032879)	1481	100	67.51	+	1.48	0.000152	0.0194
nitrogen compound metabolic process (GO:0006807)	4530	257	206.48	+	1.24	0.000155	0.0197
positive regulation of nucleic acid-templated transcription (GO:1903508)	933	69	42.53	+	1.62	0.000178	0.0219
positive regulation of RNA biosynthetic process (GO:1902680)	933	69	42.53	+	1.62	0.000178	0.0221
negative regulation of macromolecule metabolic process (GO:0010605)	1407	96	64.13	+	1.5	0.000176	0.0221
protein phosphorylation (GO:0006468)	634	51	28.9	+	1.76	0.000189	0.0231
histone acetylation (GO:0016573)	81	13	3.69	+	3.52	0.000216	0.0252
phosphorylation (GO:0016310)	832	63	37.92	+	1.66	0.000209	0.0253
response to nitrogen compound (GO:1901698)	407	37	18.55	+	1.99	0.000216	0.0254
response to endogenous stimulus (GO:0009719)	585	48	26.67	+	1.8	0.00022	0.0255
positive regulation of MAPK cascade (GO:0043410)	263	27	11.99	+	2.25	0.000215	0.0256
positive regulation of transcription, DNA-templated (GO:0045893)	872	65	39.75	+	1.64	0.000214	0.0256
intracellular signal transduction (GO:0035556)	802	61	36.56	+	1.67	0.000227	0.026
positive regulation of signal transduction (GO:0009967)	808	61	36.83	+	1.66	0.000244	0.0275
positive regulation of RNA metabolic process (GO:0051254)	977	71	44.53	+	1.59	0.000244	0.0277
negative regulation of nitrogen compound metabolic process (GO:0051172)	1265	87	57.66	+	1.51	0.000251	0.0281
visual system development (GO:0150063)	210	23	9.57	+	2.4	0.000261	0.0287
sensory perception (GO:0007600)	860	18	39.2	-	0.46	0.000259	0.0287
sensory system development (GO:0048880)	211	23	9.62	+	2.39	0.000274	0.0299
regulation of developmental process (GO:0050793)	1400	94	63.81	+	1.47	0.000292	0.0316
lung development (GO:0030324)	108	15	4.92	+	3.05	0.000302	0.0324
negative regulation of cellular biosynthetic process (GO:0031327)	798	60	36.37	+	1.65	0.000311	0.0331
cell recognition (GO:0008037)	52	10	2.37	+	4.22	0.000323	0.0339
cellular response to organic substance (GO:0071310)	1019	73	46.45	+	1.57	0.000322	0.034
negative regulation of metabolic process (GO:0009892)	1546	102	70.47	+	1.45	0.000327	0.034
protein modification by small protein conjugation (GO:0032446)	405	36	18.46	+	1.95	0.000336	0.0347
negative regulation of macromolecule biosynthetic process (GO:0010558)	769	58	35.05	+	1.65	0.000347	0.0354
regulation of protein metabolic process (GO:0051246)	1570	103	71.56	+	1.44	0.000361	0.0363
regulation of intracellular signal transduction (GO:1902531)	942	68	42.94	+	1.58	0.000359	0.0365
regulation of biological quality (GO:0065008)	2117	132	96.5	+	1.37	0.000375	0.0374
peptidyl-lysine modification (GO:0018205)	186	21	8.48	+	2.48	0.000388	0.0385
G protein-coupled receptor signaling pathway (GO:0007186)	1109	27	50.55	-	0.53	0.00042	0.0413
replacement ossification (GO:0036075)	18	6	0.82	+	7.31	0.000462	0.0442
endochondral ossification (GO:0001958)	18	6	0.82	+	7.31	0.000462	0.0446
negative regulation of cellular metabolic process (GO:0031324)	1395	93	63.59	+	1.46	0.000461	0.0447
negative regulation of biosynthetic process (GO:0009890)	808	60	36.83	+	1.63	0.00046	0.0449
response to organic cyclic compound (GO:0014070)	293	28	13.36	+	2.1	0.00048	0.0455
regulation of multicellular organismal development (GO:2000026)	1089	76	49.64	+	1.53	0.00049	0.0462
eye development (GO:0001654)	208	22	9.48	+	2.32	0.000518	0.0485
cellular response to endogenous stimulus (GO:0071495)	527	43	24.02	+	1.79	0.000527	0.0486
regulation of carbohydrate metabolic process (GO:0006109)	78	12	3.56	+	3.38	0.000525	0.0488
camera-type eye development (GO:0043010)	177	20	8.07	+	2.48	0.000549	0.0504
protein ubiquitination (GO:0016567)	382	34	17.41	+	1.95	0.000566	0.0516
regulation of secretion by cell (GO:1903530)	355	32	16.18	+	1.98	0.000574	0.0519
positive regulation of cell communication (GO:0010647)	883	64	40.25	+	1.59	0.00058	0.0521
positive regulation of signaling (GO:0023056)	887	64	40.43	+	1.58	0.000599	0.0534
sensory organ development (GO:0007423)	329	30	15	+	2	0.000624	0.0553
peptidyl-amino acid modification (GO:0018193)	548	44	24.98	+	1.76	0.000667	0.0587
negative regulation of neuron differentiation (GO:0045665)	105	14	4.79	+	2.93	0.000683	0.0597
positive regulation of response to stimulus (GO:0048584)	1105	76	50.37	+	1.51	0.000703	0.0611
sensory organ morphogenesis (GO:0090596)	165	19	7.52	+	2.53	0.000714	0.0616
positive regulation of intracellular signal transduction (GO:1902533)	489	40	22.29	+	1.79	0.000743	0.0637
intracellular receptor signaling pathway (GO:0030522)	70	11	3.19	+	3.45	0.000758	0.0646
monosaccharide metabolic process (GO:0005996)	82	12	3.74	+	3.21	0.000781	0.0662
positive regulation of nervous system development (GO:0051962)	244	24	11.12	+	2.16	0.000794	0.0668
negative regulation of neurogenesis (GO:0050768)	133	16	6.06	+	2.64	0.000808	0.0675
regulation of phosphorus metabolic process (GO:0051174)	984	69	44.85	+	1.54	0.000819	0.0676
regulation of phosphate metabolic process (GO:0019220)	984	69	44.85	+	1.54	0.000819	0.0681
signal transduction by protein phosphorylation (GO:0023014)	95	13	4.33	+	3	0.000844	0.0693
regulation of protein modification process (GO:0031399)	1040	72	47.4	+	1.52	0.000851	0.0694
negative regulation of cellular macromolecule biosynthetic process (GO:2000113)	724	54	33	+	1.64	0.000857	0.0695
negative regulation of nucleic acid-templated transcription (GO:1903507)	647	49	29.49	+	1.66	0.000915	0.0733
negative regulation of RNA biosynthetic process (GO:1902679)	647	49	29.49	+	1.66	0.000915	0.0737
hexose metabolic process (GO:0019318)	72	11	3.28	+	3.35	0.000932	0.0742
lung alveolus development (GO:0048286)	30	7	1.37	+	5.12	0.000957	0.0753
respiratory system development (GO:0060541)	122	15	5.56	+	2.7	0.000951	0.0753
regulation of cell differentiation (GO:0045595)	919	65	41.89	+	1.55	0.000981	0.0767
embryonic organ morphogenesis (GO:0048562)	190	20	8.66	+	2.31	0.000987	0.0768
regulation of cell development (GO:0060284)	449	37	20.47	+	1.81	0.00101	0.0772
regulation of cellular protein metabolic process (GO:0032268)	1470	95	67	+	1.42	0.001	0.0772
response to drug (GO:0042493)	334	30	15.22	+	1.97	0.001	0.0774
negative regulation of RNA metabolic process (GO:0051253)	701	52	31.95	+	1.63	0.00102	0.0776
positive regulation of stress-activated MAPK cascade (GO:0032874)	85	12	3.87	+	3.1	0.00104	0.0782
histone H4-K5 acetylation (GO:0043981)	14	5	0.64	+	7.84	0.00109	0.0807
bone morphogenesis (GO:0060349)	51	9	2.32	+	3.87	0.0011	0.0809
positive regulation of transcription by RNA polymerase II (GO:0045944)	668	50	30.45	+	1.64	0.00108	0.0809
histone H4-K8 acetylation (GO:0043982)	14	5	0.64	+	7.84	0.00109	0.0811
steroid hormone mediated signaling pathway (GO:0043401)	74	11	3.37	+	3.26	0.00114	0.0832
positive regulation of stress-activated protein kinase signaling cascade (GO:0070304)	86	12	3.92	+	3.06	0.00113	0.0833
histone H4 acetylation (GO:0043967)	41	8	1.87	+	4.28	0.00117	0.0846
response to oxygen-containing compound (GO:1901700)	603	46	27.49	+	1.67	0.0012	0.0854
ossification (GO:0001503)	112	14	5.11	+	2.74	0.0012	0.0855
organic substance transport (GO:0071702)	1001	69	45.63	+	1.51	0.00119	0.0855
hormone-mediated signaling pathway (GO:0009755)	99	13	4.51	+	2.88	0.00119	0.0858
retina development in camera-type eye (GO:0060041)	87	12	3.97	+	3.03	0.00124	0.0873
endocytosis (GO:0006897)	179	19	8.16	+	2.33	0.00124	0.0877
positive regulation of growth (GO:0045927)	140	16	6.38	+	2.51	0.00132	0.0909
epithelium development (GO:0060429)	539	42	24.57	+	1.71	0.00132	0.0911
cellular response to chemical stimulus (GO:0070887)	1295	85	59.03	+	1.44	0.0013	0.0912
negative regulation of transcription, DNA-templated (GO:0045892)	617	47	28.12	+	1.67	0.00132	0.0916
regulation of secretion (GO:0051046)	379	32	17.28	+	1.85	0.00142	0.0975
cell communication (GO:0007154)	3158	181	143.95	+	1.26	0.00144	0.098
miR-365 GO:MF
GO molecular function complete	Felis catus - REFLIST (20447)	upload_1 (405)	upload_1 (expected)	upload_1 (over/under)	upload_1 (fold Enrichment)	upload_1 (raw P-value)	upload_1 (FDR)
binding (GO:0005488)	8614	217	170.62	+	1.27	4.57e-06	0.0169
molecular_function (GO:0003674)	12415	289	245.91	+	1.18	1.15e-05	0.0212
Unclassified (UNCLASSIFIED)	8032	116	159.09	-	0.73	1.15e-05	0.0141
olfactory receptor activity (GO:0004984)	593	0	11.75	-	< 0.01	1.32e-05	0.0122
miR-365 GO:CC
no results found
miR-365 GO:BP
GO biological process complete	Felis catus - REFLIST (20447)	upload_1 (405)	upload_1 (expected)	upload_1 (over/under)	upload_1 (fold Enrichment)	upload_1 (raw P-value)	upload_1 (FDR)
detection of chemical stimulus involved in sensory perception of smell (GO:0050911)	593	0	11.75	-	< 0.01	1.32e-05	0.035
Unclassified (UNCLASSIFIED)	7374	104	146.06	-	0.71	1.31e-05	0.0434
biological_process (GO:0008150)	13073	301	258.94	+	1.16	1.31e-05	0.0579
detection of chemical stimulus (GO:0009593)	619	0	12.26	-	< 0.01	9.1e-06	0.0605
detection of chemical stimulus involved in sensory perception (GO:0050907)	607	0	12.02	-	< 0.01	8.82e-06	0.117
miR-1247 GO:MF
GO molecular function complete	Felis catus - REFLIST (20447)	upload_1 (219)	upload_1 (expected)	upload_1 (over/under)	upload_1 (fold Enrichment)	upload_1 (raw P-value)	upload_1 (FDR)
protein binding (GO:0005515)	4134	75	44.28	+	1.69	1.72e-06	0.00159
binding (GO:0005488)	8614	137	92.26	+	1.48	2.06e-09	7.61e-06
molecular_function (GO:0003674)	12415	172	132.97	+	1.29	2.74e-08	3.37e-05
Unclassified (UNCLASSIFIED)	8032	47	86.03	-	0.55	2.74e-08	5.06e-05
miR-1247 GO:CC
GO cellular component complete	Felis catus - REFLIST (20447)	upload_1 (219)	upload_1 (expected)	upload_1 (over/under)	upload_1 (fold Enrichment)	upload_1 (raw P-value)	upload_1 (FDR)
nucleus (GO:0005634)	4073	67	43.62	+	1.54	0.000176	0.0424
intracellular (GO:0005622)	8397	123	89.94	+	1.37	8.77e-06	0.00297
intracellular part (GO:0044424)	8397	123	89.94	+	1.37	8.77e-06	0.00247
cell (GO:0005623)	10313	145	110.46	+	1.31	3.28e-06	0.00555
cell part (GO:0044464)	10174	143	108.97	+	1.31	4.62e-06	0.00391
cellular_component (GO:0005575)	12797	169	137.06	+	1.23	5.88e-06	0.00249
Unclassified (UNCLASSIFIED)	7650	50	81.94	-	0.61	5.88e-06	0.00332
miR-1247 GO:BP
GO biological process complete	Felis catus - REFLIST (20447)	upload_1 (219)	upload_1 (expected)	upload_1 (over/under)	upload_1 (fold Enrichment)	upload_1 (raw P-value)	upload_1 (FDR)
biological regulation (GO:0065007)	8062	128	86.35	+	1.48	1.92e-08	8.5e-05
biological_process (GO:0008150)	13073	179	140.02	+	1.28	1.46e-08	9.68e-05
regulation of biological process (GO:0050789)	7598	122	81.38	+	1.5	3.19e-08	0.000106
regulation of cellular process (GO:0050794)	7143	116	76.51	+	1.52	6.79e-08	0.00018
Unclassified (UNCLASSIFIED)	7374	40	78.98	-	0.51	1.46e-08	0.000194
cellular process (GO:0009987)	9558	138	102.37	+	1.35	1.63e-06	0.0036
negative regulation of cellular process (GO:0048523)	2571	53	27.54	+	1.92	2.98e-06	0.00565
lymphocyte activation (GO:0046649)	214	12	2.29	+	5.24	5.6e-06	0.0093
embryo development (GO:0009790)	600	20	6.43	+	3.11	1.07e-05	0.0158
chordate embryonic development (GO:0043009)	409	16	4.38	+	3.65	1.31e-05	0.0174
negative regulation of apoptotic process (GO:0043066)	467	17	5	+	3.4	1.72e-05	0.019
embryo development ending in birth or egg hatching (GO:0009792)	416	16	4.46	+	3.59	1.6e-05	0.0194
lymphocyte differentiation (GO:0030098)	135	9	1.45	+	6.22	2.36e-05	0.0224
cellular component organization (GO:0016043)	2919	55	31.26	+	1.76	2.54e-05	0.0225
negative regulation of programmed cell death (GO:0043069)	477	17	5.11	+	3.33	2.23e-05	0.0228
multicellular organism development (GO:0007275)	2371	47	25.39	+	1.85	3.12e-05	0.0259
leukocyte activation (GO:0045321)	260	12	2.78	+	4.31	3.56e-05	0.0263
regulation of response to stimulus (GO:0048583)	2296	46	24.59	+	1.87	3.54e-05	0.0277
negative regulation of signaling (GO:0023057)	717	21	7.68	+	2.73	4.1e-05	0.0287
cell activation (GO:0001775)	311	13	3.33	+	3.9	4.5e-05	0.0299
cellular component organization or biogenesis (GO:0071840)	2996	55	32.09	+	1.71	4.97e-05	0.03
system development (GO:0048731)	2131	43	22.82	+	1.88	5.3e-05	0.0306
spinal cord development (GO:0021510)	56	6	0.6	+	10	4.96e-05	0.0314
leukocyte differentiation (GO:0002521)	191	10	2.05	+	4.89	5.92e-05	0.0315
negative regulation of cell death (GO:0060548)	520	17	5.57	+	3.05	6.3e-05	0.0322
developmental process (GO:0032502)	2720	51	29.13	+	1.75	5.81e-05	0.0322
regulation of macromolecule metabolic process (GO:0060255)	3569	62	38.23	+	1.62	7.54e-05	0.0358
negative regulation of biological process (GO:0048519)	2868	53	30.72	+	1.73	7.93e-05	0.0364
immune system development (GO:0002520)	375	14	4.02	+	3.49	7.44e-05	0.0366
anatomical structure development (GO:0048856)	2607	49	27.92	+	1.75	9.46e-05	0.0406
marginal zone B cell differentiation (GO:0002315)	6	3	0.06	+	46.68	9.41e-05	0.0417
pattern specification process (GO:0007389)	249	11	2.67	+	4.12	0.000109	0.0454
negative regulation of cell communication (GO:0010648)	714	20	7.65	+	2.62	0.000113	0.0456
regulation of metabolic process (GO:0019222)	3836	65	41.09	+	1.58	0.000117	0.0456
regulation of nitrogen compound metabolic process (GO:0051171)	3401	59	36.43	+	1.62	0.000121	0.046
regulation of apoptotic process (GO:0042981)	781	21	8.36	+	2.51	0.000132	0.0489
neural precursor cell proliferation (GO:0061351)	42	5	0.45	+	11.11	0.000136	0.049
